# Supplementary material for: Comparative Transcriptome Analysis of Differentially Expressed Genes and Signaling Pathways between XY and YY Testis in Yellow Catfish
Source: PLoS One. 2015 Aug 4;10(8):e0134626. doi: 10.1371/journal.pone.0134626 (PMC4524600; doi:10.1371/journal.pone.0134626)
Supplement: S2 Table — (XLSX) [file pone.0134626.s003.xlsx]

## Sheet: enrichment-go-DESeq-Sample_2jia
iD	Term	category	ListHits	ListTotal	PopHits	PopTotal	p	FDR	Enrichment_score	GeneID
GO:0000055	ribosomal large subunit export from nucleus	P	1	605	1	14674	0	0	24.2545	CL51873Contig1
GO:0001696	gastric acid secretion	P	1	605	1	14674	0	0	24.2545	CL13483Contig1
GO:0001838	embryonic epithelial tube formation	P	1	605	1	14674	0	0	24.2545	CL13523Contig1
GO:0001872	(1->3)-beta-D-glucan binding	F	1	605	1	14674	0	0	24.2545	CL52583Contig1
GO:0001878	response to yeast	P	1	605	1	14674	0	0	24.2545	CL52583Contig1
GO:0002121	inter-male aggressive behavior	P	1	605	1	14674	0	0	24.2545	CL52119Contig1
GO:0002361	CD4-positive, CD25-positive, alpha-beta regulatory T cell differentiation	P	1	605	1	14674	0	0	24.2545	CL49344Contig1
GO:0002376	immune system process	P	1	605	1	14674	0	0	24.2545	CL51818Contig1
GO:0002446	neutrophil mediated immunity	P	2	605	2	14674	0	0	24.2545	CL20341Contig1;CL47336Contig1
GO:0002633	positive regulation of granuloma formation	P	1	605	1	14674	0	0	24.2545	CL55132Contig1
GO:0002690	positive regulation of leukocyte chemotaxis	P	1	605	1	14674	0	0	24.2545	CL19349Contig1
GO:0003829	beta-1,3-galactosyl-O-glycosyl-glycoprotein beta-1,6-N-acetylglucosaminyltransferase activity	F	1	605	1	14674	0	0	24.2545	CL52119Contig1
GO:0004038	allantoinase activity	F	1	605	1	14674	0	0	24.2545	comp99620_c0_seq2
GO:0004128	cytochrome-b5 reductase activity, acting on NAD(P)H	F	1	605	1	14674	0	0	24.2545	CL58052Contig1
GO:0004586	ornithine decarboxylase activity	F	2	605	2	14674	0	0	24.2545	CL35022Contig1;CL51095Contig1
GO:0004651	polynucleotide 5'-phosphatase activity	F	2	605	2	14674	0	0	24.2545	CL53834Contig1;CL56663Contig1
GO:0004687	myosin light chain kinase activity	F	1	605	1	14674	0	0	24.2545	CL57294Contig1
GO:0004947	bradykinin receptor activity	F	1	605	1	14674	0	0	24.2545	CL59086Contig1
GO:0004990	oxytocin receptor activity	F	1	605	1	14674	0	0	24.2545	CL53494Contig1
GO:0005000	vasopressin receptor activity	F	1	605	1	14674	0	0	24.2545	CL53494Contig1
GO:0005298	proline:sodium symporter activity	F	1	605	1	14674	0	0	24.2545	CL2744Contig1
GO:0006067	ethanol metabolic process	P	1	605	1	14674	0	0	24.2545	CL57904Contig1
GO:0006070	octanol metabolic process	P	1	605	1	14674	0	0	24.2545	CL57904Contig1
GO:0006090	pyruvate metabolic process	P	1	605	1	14674	0	0	24.2545	comp106679_c0_seq15
GO:0006531	aspartate metabolic process	P	1	605	1	14674	0	0	24.2545	CL51818Contig1
GO:0006567	threonine catabolic process	P	1	605	1	14674	0	0	24.2545	CL52300Contig1
GO:0006627	protein processing involved in protein targeting to mitochondrion	P	1	605	1	14674	0	0	24.2545	CL43817Contig1
GO:0007344	pronuclear fusion	P	1	605	1	14674	0	0	24.2545	CL51660Contig1
GO:0008228	opsonization	P	1	605	1	14674	0	0	24.2545	CL52583Contig1
GO:0008591	regulation of Wnt signaling pathway, calcium modulating pathway	P	1	605	1	14674	0	0	24.2545	CL57605Contig1
GO:0008743	L-threonine 3-dehydrogenase activity	F	1	605	1	14674	0	0	24.2545	CL52300Contig1
GO:0008745	N-acetylmuramoyl-L-alanine amidase activity	F	1	605	1	14674	0	0	24.2545	CL7753Contig1
GO:0008970	phosphatidylcholine 1-acylhydrolase activity	F	1	605	1	14674	0	0	24.2545	CL52281Contig1
GO:0008973	phosphopentomutase activity	F	1	605	1	14674	0	0	24.2545	CL53724Contig1
GO:0009584	detection of visible light	P	1	605	1	14674	0	0	24.2545	CL3169Contig1
GO:0010641	positive regulation of platelet-derived growth factor receptor signaling pathway	P	1	605	1	14674	0	0	24.2545	CL19349Contig1
GO:0010739	positive regulation of protein kinase A signaling	P	1	605	1	14674	0	0	24.2545	CL16373Contig1
GO:0010983	positive regulation of high-density lipoprotein particle clearance	P	1	605	1	14674	0	0	24.2545	CL52281Contig1
GO:0014074	response to purine-containing compound	P	1	605	1	14674	0	0	24.2545	CL51818Contig1
GO:0015184	L-cystine transmembrane transporter activity	F	1	605	1	14674	0	0	24.2545	CL54593Contig1
GO:0015195	L-threonine transmembrane transporter activity	F	1	605	1	14674	0	0	24.2545	CL54593Contig1
GO:0015811	L-cystine transport	P	1	605	1	14674	0	0	24.2545	CL54593Contig1
GO:0015820	leucine transport	P	1	605	1	14674	0	0	24.2545	CL2744Contig1
GO:0015826	threonine transport	P	1	605	1	14674	0	0	24.2545	CL54593Contig1
GO:0016028	rhabdomere	C	1	605	1	14674	0	0	24.2545	CL55089Contig1
GO:0016247	channel regulator activity	F	1	605	1	14674	0	0	24.2545	CL55688Contig1
GO:0016404	15-hydroxyprostaglandin dehydrogenase (NAD+) activity	F	1	605	1	14674	0	0	24.2545	CL58918Contig1
GO:0016717	oxidoreductase activity, acting on paired donors, with oxidation of a pair of donors resulting in the reduction of molecular oxygen to two molecules of water	F	3	605	3	14674	0	0	24.2545	CL49906Contig1;CL56613Contig1;CL42838Contig1
GO:0016866	intramolecular transferase activity	F	1	605	1	14674	0	0	24.2545	CL54824Contig1
GO:0017038	protein import	P	1	605	1	14674	0	0	24.2545	CL51794Contig1
GO:0018467	formaldehyde dehydrogenase activity	F	1	605	1	14674	0	0	24.2545	CL57904Contig1
GO:0019284	L-methionine biosynthetic process from S-adenosylmethionine	P	1	605	1	14674	0	0	24.2545	CL58386Contig1
GO:0019368	fatty acid elongation, unsaturated fatty acid	P	1	605	1	14674	0	0	24.2545	CL22615Contig1
GO:0019783	small conjugating protein-specific protease activity	F	2	605	2	14674	0	0	24.2545	comp110218_c0_seq22;CL8700Contig1
GO:0021528	commissural neuron differentiation in spinal cord	P	1	605	1	14674	0	0	24.2545	CL51682Contig1
GO:0030728	ovulation	P	1	605	1	14674	0	0	24.2545	CL43817Contig1
GO:0030729	acetoacetate-CoA ligase activity	F	1	605	1	14674	0	0	24.2545	CL52176Contig1
GO:0032376	positive regulation of cholesterol transport	P	1	605	1	14674	0	0	24.2545	CL52281Contig1
GO:0032431	activation of phospholipase A2 activity	P	1	605	1	14674	0	0	24.2545	CL20341Contig1
GO:0032612	interleukin-1 production	P	1	605	1	14674	0	0	24.2545	CL47336Contig1
GO:0032637	interleukin-8 production	P	2	605	2	14674	0	0	24.2545	CL20341Contig1;CL47336Contig1
GO:0033034	positive regulation of myeloid cell apoptotic process	P	1	605	1	14674	0	0	24.2545	CL16373Contig1
GO:0033387	putrescine biosynthetic process from ornithine	P	1	605	1	14674	0	0	24.2545	CL51095Contig1
GO:0034589	hydroxyproline transport	P	1	605	1	14674	0	0	24.2545	CL54593Contig1
GO:0034590	L-hydroxyproline transmembrane transporter activity	F	1	605	1	14674	0	0	24.2545	CL54593Contig1
GO:0036148	phosphatidylglycerol acyl-chain remodeling	P	1	605	1	14674	0	0	24.2545	CL20341Contig1
GO:0036149	phosphatidylinositol acyl-chain remodeling	P	1	605	1	14674	0	0	24.2545	CL20341Contig1
GO:0036150	phosphatidylserine acyl-chain remodeling	P	1	605	1	14674	0	0	24.2545	CL20341Contig1
GO:0036151	phosphatidylcholine acyl-chain remodeling	P	1	605	1	14674	0	0	24.2545	CL20341Contig1
GO:0036152	phosphatidylethanolamine acyl-chain remodeling	P	1	605	1	14674	0	0	24.2545	CL20341Contig1
GO:0036351	histone H2A-K13 ubiquitination	P	1	605	1	14674	0	0	24.2545	CL18595Contig1
GO:0036352	histone H2A-K15 ubiquitination	P	1	605	1	14674	0	0	24.2545	CL18595Contig1
GO:0042105	alpha-beta T cell receptor complex	C	1	605	1	14674	0	0	24.2545	CL50754Contig1
GO:0042585	germinal vesicle	C	1	605	1	14674	0	0	24.2545	CL52423Contig1
GO:0042720	mitochondrial inner membrane peptidase complex	C	1	605	1	14674	0	0	24.2545	CL43817Contig1
GO:0044240	multicellular organismal lipid catabolic process	P	2	605	2	14674	0	0	24.2545	CL20341Contig1;CL47336Contig1
GO:0045047	protein targeting to ER	P	1	605	1	14674	0	0	24.2545	CL15079Contig1
GO:0045163	clustering of voltage-gated potassium channels	P	1	605	1	14674	0	0	24.2545	CL55248Contig1
GO:0045923	positive regulation of fatty acid metabolic process	P	1	605	1	14674	0	0	24.2545	CL16373Contig1
GO:0046040	IMP metabolic process	P	1	605	1	14674	0	0	24.2545	CL51818Contig1
GO:0046292	formaldehyde metabolic process	P	1	605	1	14674	0	0	24.2545	CL57904Contig1
GO:0046386	deoxyribose phosphate catabolic process	P	1	605	1	14674	0	0	24.2545	CL53724Contig1
GO:0046470	phosphatidylcholine metabolic process	P	1	605	1	14674	0	0	24.2545	CL47336Contig1
GO:0046539	histamine N-methyltransferase activity	F	1	605	1	14674	0	0	24.2545	CL17Contig1
GO:0046570	methylthioribulose 1-phosphate dehydratase activity	F	1	605	1	14674	0	0	24.2545	CL58386Contig1
GO:0048170	positive regulation of long-term neuronal synaptic plasticity	P	1	605	1	14674	0	0	24.2545	CL13523Contig1
GO:0048848	neurohypophysis morphogenesis	P	1	605	1	14674	0	0	24.2545	CL53494Contig1
GO:0050746	regulation of lipoprotein metabolic process	P	1	605	1	14674	0	0	24.2545	CL52281Contig1
GO:0050833	pyruvate transmembrane transporter activity	F	1	605	1	14674	0	0	24.2545	comp106679_c0_seq15
GO:0060084	synaptic transmission involved in micturition	P	1	605	1	14674	0	0	24.2545	CL51524Contig1
GO:0060359	response to ammonium ion	P	1	605	1	14674	0	0	24.2545	CL51818Contig1
GO:0060385	axonogenesis involved in innervation	P	1	605	1	14674	0	0	24.2545	CL4674Contig1
GO:0061472	karyomere membrane fusion	P	1	605	1	14674	0	0	24.2545	CL51660Contig1
GO:0070228	regulation of lymphocyte apoptotic process	P	1	605	1	14674	0	0	24.2545	CL50754Contig1
GO:0070573	metallodipeptidase activity	F	2	605	2	14674	0	0	24.2545	comp96179_c1_seq3;CL49837Contig1
GO:0070702	inner mucus layer	C	1	605	1	14674	0	0	24.2545	CL26915Contig1
GO:0070703	outer mucus layer	C	1	605	1	14674	0	0	24.2545	CL26915Contig1
GO:0070994	detection of oxidative stress	P	1	605	1	14674	0	0	24.2545	CL16373Contig1
GO:0071567	UFM1 hydrolase activity	F	1	605	1	14674	0	0	24.2545	CL45406Contig1
GO:0086012	membrane depolarization during cardiac muscle cell action potential	P	1	605	1	14674	0	0	24.2545	CL15665Contig1
GO:0086070	SA node cell to atrial cardiac muscle cell communication	P	1	605	1	14674	0	0	24.2545	CL15665Contig1
GO:0090317	negative regulation of intracellular protein transport	P	1	605	1	14674	0	0	24.2545	CL16373Contig1
GO:0097117	guanylate kinase-associated protein clustering	P	1	605	1	14674	0	0	24.2545	CL13523Contig1
GO:1900271	regulation of long-term synaptic potentiation	P	1	605	1	14674	0	0	24.2545	CL13523Contig1
GO:1900451	positive regulation of glutamate receptor signaling pathway	P	1	605	1	14674	0	0	24.2545	CL13523Contig1
GO:1900452	regulation of long term synaptic depression	P	1	605	1	14674	0	0	24.2545	CL13523Contig1
GO:1901379	regulation of potassium ion transmembrane transport	P	1	605	1	14674	0	0	24.2545	CL13662Contig1
GO:1901475	pyruvate transmembrane transport	P	1	605	1	14674	0	0	24.2545	comp106679_c0_seq15
GO:2000297	negative regulation of synapse maturation	P	1	605	1	14674	0	0	24.2545	CL67747Contig1
GO:2000478	positive regulation of metanephric glomerular visceral epithelial cell development	P	1	605	1	14674	0	0	24.2545	CL16373Contig1
GO:2000534	positive regulation of renal albumin absorption	P	1	605	1	14674	0	0	24.2545	CL16373Contig1
GO:2000584	negative regulation of platelet-derived growth factor receptor-alpha signaling pathway	P	1	605	1	14674	0	0	24.2545	CL16373Contig1
GO:2000590	negative regulation of metanephric mesenchymal cell migration	P	1	605	1	14674	0	0	24.2545	CL16373Contig1
GO:2000822	regulation of behavioral fear response	P	1	605	1	14674	0	0	24.2545	CL13523Contig1
GO:2000835	negative regulation of androgen secretion	P	1	605	1	14674	0	0	24.2545	CL51317Contig1
GO:0006508	proteolysis	P	58	605	437	14674	5.41002e-16	7.48075e-15	3.21914	CL54720Contig1;comp96179_c1_seq3;CL43249Contig1;CL62558Contig1;CL56045Contig1;comp110218_c0_seq22;CL55588Contig1;CL7564Contig1;CL56795Contig1;CL2689Contig1;CL56572Contig1;CL74832Contig1;CL338Contig1;CL74807Contig1;CL42339Contig1;comp177559_c0_seq1;CL46105Contig1;CL27630Contig1;CL59000Contig1;CL56645Contig1;CL13846Contig1;CL49837Contig1;CL44963Contig1;CL54447Contig1;CL67573Contig1;CL12150Contig1;C…
GO:0006278	RNA-dependent DNA replication	P	38	605	243	14674	2.40547e-13	3.29775e-12	3.79289	CL58571Contig1;comp111663_c0_seq2;CL4774Contig1;CL13910Contig1;comp12324_c0_seq1;CL338Contig1;comp177559_c0_seq1;CL27630Contig1;CL75082Contig1;CL58289Contig1;CL12150Contig1;CL2195Contig1;CL54904Contig1;CL3167Contig1;CL1001Contig1;CL15679Contig1;CL67791Contig1;comp112590_c1_seq4;CL54653Contig1;CL14035Contig1;CL2394Contig1;CL15227Contig1;CL15972Contig1;CL72691Contig1;CL17768Contig1;CL52116Contig1;c…
GO:0003964	RNA-directed DNA polymerase activity	F	38	605	244	14674	2.75434e-13	3.74403e-12	3.77735	CL58571Contig1;comp111663_c0_seq2;CL4774Contig1;CL13910Contig1;comp12324_c0_seq1;CL338Contig1;comp177559_c0_seq1;CL27630Contig1;CL75082Contig1;CL58289Contig1;CL12150Contig1;CL2195Contig1;CL54904Contig1;CL3167Contig1;CL1001Contig1;CL15679Contig1;CL67791Contig1;comp112590_c1_seq4;CL54653Contig1;CL14035Contig1;CL2394Contig1;CL15227Contig1;CL15972Contig1;CL72691Contig1;CL17768Contig1;CL52116Contig1;c…
GO:0004252	serine-type endopeptidase activity	F	21	605	108	14674	4.09654e-10	5.52173e-09	4.71616	CL43249Contig1;CL62558Contig1;CL56045Contig1;CL55588Contig1;CL7564Contig1;CL56795Contig1;CL74807Contig1;CL46105Contig1;CL59000Contig1;CL56645Contig1;CL67573Contig1;CL46673Contig1;comp162224_c0_seq1;CL2166Contig1;CL19349Contig1;CL32123Contig1;CL45416Contig1;CL15743Contig1;CL55827Contig1;CL56094Contig1;CL48514Contig1
GO:0015074	DNA integration	P	33	605	257	14674	1.76304e-09	2.3566e-08	3.1144	comp111663_c0_seq2;CL13910Contig1;CL338Contig1;CL5261Contig1;comp177559_c0_seq1;CL27630Contig1;CL12583Contig1;CL58289Contig1;CL12150Contig1;CL2195Contig1;CL1001Contig1;CL15679Contig1;CL67791Contig1;comp112590_c1_seq4;CL15708Contig1;CL14738Contig1;CL45430Contig1;CL48106Contig1;CL542Contig1;comp99632_c0_seq3;CL15972Contig1;CL17768Contig1;CL11745Contig1;CL53826Contig1;CL21353Contig1;CL56559Contig1;c…
GO:0003723	RNA binding	F	46	605	544	14674	1.29864e-06	1.7215e-05	2.05094	CL58218Contig1;CL58571Contig1;comp111663_c0_seq2;CL54131Contig1;CL4774Contig1;CL13910Contig1;comp12324_c0_seq1;CL338Contig1;comp177559_c0_seq1;CL27630Contig1;CL75082Contig1;CL58289Contig1;CL12150Contig1;CL2195Contig1;CL54904Contig1;CL53930Contig1;CL3167Contig1;CL1001Contig1;CL15679Contig1;CL67791Contig1;comp112590_c1_seq4;comp62502_c0_seq1;CL54653Contig1;CL14035Contig1;CL1809Contig1;CL13727Contig…
GO:0002504	antigen processing and presentation of peptide or polysaccharide antigen via MHC class II	P	3	605	4	14674	2.86213e-06	3.64354e-05	18.1909	CL21873Contig1;comp99580_c0_seq1;comp90693_c0_seq1
GO:0008424	glycoprotein 6-alpha-L-fucosyltransferase activity	F	3	605	4	14674	2.86213e-06	3.64354e-05	18.1909	CL16085Contig1;CL44875Contig1;CL9299Contig1
GO:0033578	protein glycosylation in Golgi	P	3	605	4	14674	2.86213e-06	3.64354e-05	18.1909	CL16085Contig1;CL44875Contig1;CL9299Contig1
GO:0036071	N-glycan fucosylation	P	3	605	4	14674	2.86213e-06	3.64354e-05	18.1909	CL16085Contig1;CL44875Contig1;CL9299Contig1
GO:0042613	MHC class II protein complex	C	3	605	4	14674	2.86213e-06	3.64354e-05	18.1909	CL21873Contig1;comp99580_c0_seq1;comp90693_c0_seq1
GO:0030916	otic vesicle formation	P	4	605	8	14674	5.91809e-06	7.47451e-05	12.1273	CL66710Contig1;CL16855Contig1;CL52638Contig1;CL5365Contig1
GO:0005391	sodium:potassium-exchanging ATPase activity	F	5	605	14	14674	1.08382e-05	0.000135817	8.66234	CL66710Contig1;CL46776Contig1;CL16855Contig1;CL40433Contig1;CL5365Contig1
GO:0004190	aspartic-type endopeptidase activity	F	11	605	66	14674	1.38433e-05	0.000172129	4.04242	CL338Contig1;comp177559_c0_seq1;CL27630Contig1;CL12150Contig1;CL1001Contig1;CL15679Contig1;comp112590_c1_seq4;CL15972Contig1;CL17768Contig1;CL53826Contig1;CL21353Contig1
GO:0016790	thiolester hydrolase activity	F	3	605	6	14674	4.01658e-05	0.000491801	12.1273	comp110218_c0_seq22;CL8700Contig1;CL45406Contig1
GO:0042301	phosphate ion binding	F	3	605	6	14674	4.01658e-05	0.000491801	12.1273	CL51818Contig1;CL47151Contig1;CL71432Contig1
GO:0006754	ATP biosynthetic process	P	5	605	18	14674	5.81579e-05	0.000706707	6.73737	CL66710Contig1;CL46776Contig1;CL16855Contig1;CL40433Contig1;CL5365Contig1
GO:0004484	mRNA guanylyltransferase activity	F	2	605	3	14674	6.97514e-05	0.000793484	16.1697	CL53834Contig1;CL56663Contig1
GO:0007586	digestion	P	2	605	3	14674	6.97514e-05	0.000793484	16.1697	CL43249Contig1;CL46988Contig1
GO:0017171	serine hydrolase activity	F	2	605	3	14674	6.97514e-05	0.000793484	16.1697	CL47151Contig1;CL71432Contig1
GO:0031947	negative regulation of glucocorticoid biosynthetic process	P	2	605	3	14674	6.97514e-05	0.000793484	16.1697	CL16855Contig1;CL5365Contig1
GO:0032052	bile acid binding	F	2	605	3	14674	6.97514e-05	0.000793484	16.1697	CL20341Contig1;CL47336Contig1
GO:0043112	receptor metabolic process	P	2	605	3	14674	6.97514e-05	0.000793484	16.1697	CL44875Contig1;CL9299Contig1
GO:0045088	regulation of innate immune response	P	2	605	3	14674	6.97514e-05	0.000793484	16.1697	CL1809Contig1;CL13727Contig1
GO:0045989	positive regulation of striated muscle contraction	P	2	605	3	14674	6.97514e-05	0.000793484	16.1697	CL16855Contig1;CL5365Contig1
GO:0050778	positive regulation of immune response	P	2	605	3	14674	6.97514e-05	0.000793484	16.1697	CL20341Contig1;CL47336Contig1
GO:0003678	DNA helicase activity	F	4	605	12	14674	7.29021e-05	0.000823485	8.08485	CL59676Contig1;CL15875Contig1;CL64762Contig1;comp112356_c0_seq15
GO:0004181	metallocarboxypeptidase activity	F	5	605	19	14674	8.20506e-05	0.000920344	6.38278	CL74832Contig1;CL44963Contig1;CL58446Contig1;CL9169Contig1;CL35772Contig1
GO:0060974	cell migration involved in heart formation	P	3	605	7	14674	9.06569e-05	0.00100982	10.3948	CL66710Contig1;CL16855Contig1;CL5365Contig1
GO:0010172	embryonic body morphogenesis	P	4	605	14	14674	0.00017202	0.00187701	6.92987	CL66710Contig1;CL16855Contig1;CL57605Contig1;CL5365Contig1
GO:0030593	neutrophil chemotaxis	P	4	605	14	14674	0.00017202	0.00187701	6.92987	CL2033Contig1;CL20341Contig1;CL47336Contig1;CL53574Contig1
GO:0050766	positive regulation of phagocytosis	P	4	605	14	14674	0.00017202	0.00187701	6.92987	CL3169Contig1;CL52583Contig1;CL55089Contig1;CL38822Contig1
GO:0004180	carboxypeptidase activity	F	3	605	8	14674	0.000175396	0.00188815	9.09545	comp96179_c1_seq3;CL56572Contig1;CL49837Contig1
GO:0019370	leukotriene biosynthetic process	P	3	605	8	14674	0.000175396	0.00188815	9.09545	CL2033Contig1;CL20341Contig1;CL47336Contig1
GO:0035725	sodium ion transmembrane transport	P	11	605	86	14674	0.000202971	0.00215627	3.10233	CL54593Contig1;CL15665Contig1;CL2744Contig1;CL66710Contig1;CL14002Contig1;CL17264Contig1;CL49004Contig1;CL16855Contig1;CL51542Contig1;CL15039Contig1;CL5365Contig1
GO:0009617	response to bacterium	P	5	605	22	14674	0.000202991	0.00215627	5.5124	CL38931Contig1;comp162224_c0_seq1;CL3624Contig1;CL55132Contig1;CL48514Contig1
GO:0000723	telomere maintenance	P	4	605	15	14674	0.000249313	0.00263091	6.46788	CL59676Contig1;CL15875Contig1;CL64762Contig1;comp112356_c0_seq15
GO:0003064	regulation of heart rate by hormone	P	2	605	4	14674	0.000270419	0.00269411	12.1273	comp70295_c0_seq1;comp70300_c0_seq1
GO:0010524	positive regulation of calcium ion transport into cytosol	P	2	605	4	14674	0.000270419	0.00269411	12.1273	CL20341Contig1;CL47336Contig1
GO:0016286	small conductance calcium-activated potassium channel activity	F	2	605	4	14674	0.000270419	0.00269411	12.1273	CL13662Contig1;CL14560Contig1
GO:0030853	negative regulation of granulocyte differentiation	P	2	605	4	14674	0.000270419	0.00269411	12.1273	CL56004Contig1;CL16373Contig1
GO:0042612	MHC class I protein complex	C	2	605	4	14674	0.000270419	0.00269411	12.1273	CL25423Contig1;CL8796Contig1
GO:0045650	negative regulation of macrophage differentiation	P	2	605	4	14674	0.000270419	0.00269411	12.1273	CL56004Contig1;CL16373Contig1
GO:0051373	FATZ binding	F	2	605	4	14674	0.000270419	0.00269411	12.1273	CL68962Contig1;CL56933Contig1
GO:0070080	titin Z domain binding	F	2	605	4	14674	0.000270419	0.00269411	12.1273	CL68962Contig1;CL56933Contig1
GO:1902309	negative regulation of peptidyl-serine dephosphorylation	P	2	605	4	14674	0.000270419	0.00269411	12.1273	comp70295_c0_seq1;comp70300_c0_seq1
GO:0006956	complement activation	P	3	605	9	14674	0.000305422	0.00302405	8.08485	comp162224_c0_seq1;CL38822Contig1;CL48514Contig1
GO:0090305	nucleic acid phosphodiester bond hydrolysis	P	10	605	78	14674	0.000337242	0.00331863	3.10956	CL54131Contig1;CL59676Contig1;CL15875Contig1;CL64762Contig1;comp112590_c1_seq4;comp8250_c0_seq1;CL54204Contig1;CL17768Contig1;comp112356_c0_seq15;CL53826Contig1
GO:0004806	triglyceride lipase activity	F	3	605	10	14674	0.000492468	0.00478739	7.27636	CL42675Contig1;CL11851Contig1;CL57509Contig1
GO:0046718	viral entry into host cell	P	3	605	10	14674	0.000492468	0.00478739	7.27636	comp112590_c1_seq4;CL17768Contig1;CL53826Contig1
GO:0004970	ionotropic glutamate receptor activity	F	5	605	26	14674	0.000544182	0.00525824	4.66434	CL26807Contig1;CL2963Contig1;CL23639Contig1;CL72487Contig1;CL52554Contig1
GO:0006955	immune response	P	11	605	97	14674	0.000627332	0.00602539	2.75052	CL25423Contig1;CL74732Contig1;CL21873Contig1;comp99580_c0_seq1;comp90693_c0_seq1;CL56563Contig1;CL8796Contig1;CL59115Contig1;comp66281_c0_seq1;CL38853Contig1;CL72172Contig1
GO:0001916	positive regulation of T cell mediated cytotoxicity	P	2	605	5	14674	0.000655285	0.00607559	9.70182	CL25423Contig1;CL8796Contig1
GO:0039660	structural constituent of virion	F	2	605	5	14674	0.000655285	0.00607559	9.70182	comp112590_c1_seq4;CL17768Contig1
GO:0042273	ribosomal large subunit biogenesis	P	2	605	5	14674	0.000655285	0.00607559	9.70182	CL51873Contig1;CL69861Contig1
GO:0043171	peptide catabolic process	P	2	605	5	14674	0.000655285	0.00607559	9.70182	comp96179_c1_seq3;CL49837Contig1
GO:0043366	beta selection	P	2	605	5	14674	0.000655285	0.00607559	9.70182	CL2033Contig1;comp66281_c0_seq1
GO:0046638	positive regulation of alpha-beta T cell differentiation	P	2	605	5	14674	0.000655285	0.00607559	9.70182	CL2033Contig1;comp66281_c0_seq1
GO:0030315	T-tubule	C	5	605	27	14674	0.000675539	0.00622738	4.49158	CL18996Contig1;CL67774Contig1;CL33624Contig1;CL16855Contig1;CL5365Contig1
GO:0035051	cardiocyte differentiation	P	3	605	11	14674	0.000748725	0.0068626	6.61488	CL66710Contig1;CL16855Contig1;CL5365Contig1
GO:0004984	olfactory receptor activity	F	4	605	20	14674	0.00108452	0.00972235	4.85091	CL3908Contig1;CL33750Contig1;CL31250Contig1;CL670Contig1
GO:0050911	detection of chemical stimulus involved in sensory perception of smell	P	4	605	20	14674	0.00108452	0.00972235	4.85091	CL3908Contig1;CL33750Contig1;CL31250Contig1;CL670Contig1
GO:0005234	extracellular-glutamate-gated ion channel activity	F	6	605	40	14674	0.00111344	0.00972235	3.63818	CL26807Contig1;CL2963Contig1;CL23639Contig1;CL72487Contig1;CL1102Contig1;CL52554Contig1
GO:0005089	Rho guanyl-nucleotide exchange factor activity	F	12	605	119	14674	0.00124019	0.00972235	2.44584	CL16349Contig1;CL61982Contig1;CL10939Contig1;CL73978Contig1;CL67747Contig1;CL53704Contig1;CL47996Contig1;CL39499Contig1;CL51361Contig1;CL53944Contig1;comp191925_c0_seq1;CL12619Contig1
GO:0003810	protein-glutamine gamma-glutamyltransferase activity	F	2	605	6	14674	0.00127041	0.00972235	8.08485	CL52409Contig1;CL69343Contig1
GO:0004415	hyalurononglucosaminidase activity	F	2	605	6	14674	0.00127041	0.00972235	8.08485	CL2290Contig1;CL15787Contig1
GO:0004500	dopamine beta-monooxygenase activity	F	2	605	6	14674	0.00127041	0.00972235	8.08485	CL55476Contig1;CL71697Contig1
GO:0014850	response to muscle activity	P	2	605	6	14674	0.00127041	0.00972235	8.08485	CL56067Contig1;CL67774Contig1
GO:0020002	host cell plasma membrane	C	2	605	6	14674	0.00127041	0.00972235	8.08485	comp112590_c1_seq4;CL17768Contig1
GO:0030035	microspike assembly	P	2	605	6	14674	0.00127041	0.00972235	8.08485	CL68962Contig1;CL56933Contig1
GO:0036065	fucosylation	P	2	605	6	14674	0.00127041	0.00972235	8.08485	CL49344Contig1;CL1520Contig1
GO:0050482	arachidonic acid secretion	P	2	605	6	14674	0.00127041	0.00972235	8.08485	CL20341Contig1;CL47336Contig1
GO:0050715	positive regulation of cytokine secretion	P	2	605	6	14674	0.00127041	0.00972235	8.08485	CL60568Contig1;CL2033Contig1
GO:0050819	negative regulation of coagulation	P	2	605	6	14674	0.00127041	0.00972235	8.08485	CL68720Contig1;CL13776Contig1
GO:0050850	positive regulation of calcium-mediated signaling	P	2	605	6	14674	0.00127041	0.00972235	8.08485	CL2033Contig1;comp66281_c0_seq1
GO:0071205	protein localization to juxtaparanode region of axon	P	2	605	6	14674	0.00127041	0.00972235	8.08485	CL55248Contig1;CL9484Contig1
GO:0075713	establishment of integrated proviral latency	P	2	605	6	14674	0.00127041	0.00972235	8.08485	comp112590_c1_seq4;CL17768Contig1
GO:0086013	membrane repolarization during cardiac muscle cell action potential	P	2	605	6	14674	0.00127041	0.00972235	8.08485	comp70295_c0_seq1;comp70300_c0_seq1
GO:1901018	positive regulation of potassium ion transmembrane transporter activity	P	2	605	6	14674	0.00127041	0.00972235	8.08485	CL68962Contig1;CL56933Contig1
GO:0051607	defense response to virus	P	5	605	31	14674	0.0014607	0.00972235	3.91202	CL22031Contig1;CL24273Contig1;CL1809Contig1;CL13727Contig1;CL66Contig1
GO:0009410	response to xenobiotic stimulus	P	3	605	13	14674	0.00151872	0.00972235	5.5972	CL51548Contig1;CL73519Contig1;CL56728Contig1
GO:0000256	allantoin catabolic process	P	1	605	2	14674	0.00169717	0.00972235	12.1273	comp99620_c0_seq2
GO:0001971	negative regulation of activation of membrane attack complex	P	1	605	2	14674	0.00169717	0.00972235	12.1273	CL75012Contig1
GO:0002443	leukocyte mediated immunity	P	1	605	2	14674	0.00169717	0.00972235	12.1273	CL71697Contig1
GO:0002522	leukocyte migration involved in immune response	P	1	605	2	14674	0.00169717	0.00972235	12.1273	CL49344Contig1
GO:0003350	pulmonary myocardium development	P	1	605	2	14674	0.00169717	0.00972235	12.1273	CL5783Contig1
GO:0003720	telomerase activity	F	1	605	2	14674	0.00169717	0.00972235	12.1273	CL53930Contig1
GO:0003920	GMP reductase activity	F	1	605	2	14674	0.00169717	0.00972235	12.1273	CL3172Contig1
GO:0003955	NAD(P)H dehydrogenase (quinone) activity	F	1	605	2	14674	0.00169717	0.00972235	12.1273	CL58052Contig1
GO:0004053	arginase activity	F	1	605	2	14674	0.00169717	0.00972235	12.1273	CL15721Contig1
GO:0004104	cholinesterase activity	F	1	605	2	14674	0.00169717	0.00972235	12.1273	CL52510Contig1
GO:0004420	hydroxymethylglutaryl-CoA reductase (NADPH) activity	F	1	605	2	14674	0.00169717	0.00972235	12.1273	CL54823Contig1
GO:0004508	steroid 17-alpha-monooxygenase activity	F	1	605	2	14674	0.00169717	0.00972235	12.1273	CL15597Contig1
GO:0004540	ribonuclease activity	F	1	605	2	14674	0.00169717	0.00972235	12.1273	CL176Contig1
GO:0004854	xanthine dehydrogenase activity	F	1	605	2	14674	0.00169717	0.00972235	12.1273	CL67196Contig1
GO:0004855	xanthine oxidase activity	F	1	605	2	14674	0.00169717	0.00972235	12.1273	CL67196Contig1
GO:0005094	Rho GDP-dissociation inhibitor activity	F	1	605	2	14674	0.00169717	0.00972235	12.1273	CL13997Contig1
GO:0006525	arginine metabolic process	P	1	605	2	14674	0.00169717	0.00972235	12.1273	CL15721Contig1
GO:0006636	unsaturated fatty acid biosynthetic process	P	1	605	2	14674	0.00169717	0.00972235	12.1273	CL42838Contig1
GO:0006693	prostaglandin metabolic process	P	1	605	2	14674	0.00169717	0.00972235	12.1273	CL58918Contig1
GO:0006850	mitochondrial pyruvate transport	P	1	605	2	14674	0.00169717	0.00972235	12.1273	comp106679_c0_seq15
GO:0006940	regulation of smooth muscle contraction	P	1	605	2	14674	0.00169717	0.00972235	12.1273	CL51524Contig1
GO:0007567	parturition	P	1	605	2	14674	0.00169717	0.00972235	12.1273	CL58918Contig1
GO:0008038	neuron recognition	P	1	605	2	14674	0.00169717	0.00972235	12.1273	CL55248Contig1
GO:0008184	glycogen phosphorylase activity	F	1	605	2	14674	0.00169717	0.00972235	12.1273	CL1895Contig1
GO:0009007	site-specific DNA-methyltransferase (adenine-specific) activity	F	1	605	2	14674	0.00169717	0.00972235	12.1273	CL14035Contig1
GO:0009922	fatty acid elongase activity	F	1	605	2	14674	0.00169717	0.00972235	12.1273	CL22615Contig1
GO:0010310	regulation of hydrogen peroxide metabolic process	P	1	605	2	14674	0.00169717	0.00972235	12.1273	CL3624Contig1
GO:0010586	miRNA metabolic process	P	1	605	2	14674	0.00169717	0.00972235	12.1273	CL54131Contig1
GO:0015193	L-proline transmembrane transporter activity	F	1	605	2	14674	0.00169717	0.00972235	12.1273	CL54593Contig1
GO:0015194	L-serine transmembrane transporter activity	F	1	605	2	14674	0.00169717	0.00972235	12.1273	CL54593Contig1
GO:0015824	proline transport	P	1	605	2	14674	0.00169717	0.00972235	12.1273	CL2744Contig1
GO:0015825	L-serine transport	P	1	605	2	14674	0.00169717	0.00972235	12.1273	CL54593Contig1
GO:0015936	coenzyme A metabolic process	P	1	605	2	14674	0.00169717	0.00972235	12.1273	CL54823Contig1
GO:0019210	kinase inhibitor activity	F	1	605	2	14674	0.00169717	0.00972235	12.1273	CL327Contig1
GO:0019815	B cell receptor complex	C	1	605	2	14674	0.00169717	0.00972235	12.1273	CL2033Contig1
GO:0021773	striatal medium spiny neuron differentiation	P	1	605	2	14674	0.00169717	0.00972235	12.1273	CL13523Contig1
GO:0030704	vitelline membrane formation	P	1	605	2	14674	0.00169717	0.00972235	12.1273	CL44719Contig1
GO:0031021	interphase microtubule organizing center	C	1	605	2	14674	0.00169717	0.00972235	12.1273	CL44822Contig1
GO:0031536	positive regulation of exit from mitosis	P	1	605	2	14674	0.00169717	0.00972235	12.1273	CL44822Contig1
GO:0031715	C5L2 anaphylatoxin chemotactic receptor binding	F	1	605	2	14674	0.00169717	0.00972235	12.1273	CL38822Contig1
GO:0032009	early phagosome	C	1	605	2	14674	0.00169717	0.00972235	12.1273	CL2033Contig1
GO:0032775	DNA methylation on adenine	P	1	605	2	14674	0.00169717	0.00972235	12.1273	CL14035Contig1
GO:0032928	regulation of superoxide anion generation	P	1	605	2	14674	0.00169717	0.00972235	12.1273	CL2033Contig1
GO:0033010	paranodal junction	C	1	605	2	14674	0.00169717	0.00972235	12.1273	CL9484Contig1
GO:0033157	regulation of intracellular protein transport	P	1	605	2	14674	0.00169717	0.00972235	12.1273	CL56592Contig1
GO:0033961	cis-stilbene-oxide hydrolase activity	F	1	605	2	14674	0.00169717	0.00972235	12.1273	CL619Contig1
GO:0034115	negative regulation of heterotypic cell-cell adhesion	P	1	605	2	14674	0.00169717	0.00972235	12.1273	CL16373Contig1
GO:0035524	proline transmembrane transport	P	1	605	2	14674	0.00169717	0.00972235	12.1273	CL54593Contig1
GO:0042309	homoiothermy	P	1	605	2	14674	0.00169717	0.00972235	12.1273	CL71697Contig1
GO:0043313	regulation of neutrophil degranulation	P	1	605	2	14674	0.00169717	0.00972235	12.1273	CL2033Contig1
GO:0043691	reverse cholesterol transport	P	1	605	2	14674	0.00169717	0.00972235	12.1273	CL52281Contig1
GO:0044345	stromal-epithelial cell signaling involved in prostate gland development	P	1	605	2	14674	0.00169717	0.00972235	12.1273	CL52970Contig1
GO:0045085	negative regulation of interleukin-2 biosynthetic process	P	1	605	2	14674	0.00169717	0.00972235	12.1273	CL13993Contig1
GO:0045132	meiotic chromosome segregation	P	1	605	2	14674	0.00169717	0.00972235	12.1273	CL55109Contig1
GO:0045197	establishment or maintenance of epithelial cell apical/basal polarity	P	1	605	2	14674	0.00169717	0.00972235	12.1273	CL7671Contig1
GO:0045401	positive regulation of interleukin-3 biosynthetic process	P	1	605	2	14674	0.00169717	0.00972235	12.1273	CL2033Contig1
GO:0045425	positive regulation of granulocyte macrophage colony-stimulating factor biosynthetic process	P	1	605	2	14674	0.00169717	0.00972235	12.1273	CL2033Contig1
GO:0045794	negative regulation of cell volume	P	1	605	2	14674	0.00169717	0.00972235	12.1273	CL13523Contig1
GO:0046487	glyoxylate metabolic process	P	1	605	2	14674	0.00169717	0.00972235	12.1273	CL14199Contig1
GO:0046851	negative regulation of bone remodeling	P	1	605	2	14674	0.00169717	0.00972235	12.1273	CL52970Contig1
GO:0047442	17-alpha-hydroxyprogesterone aldolase activity	F	1	605	2	14674	0.00169717	0.00972235	12.1273	CL15597Contig1
GO:0047498	calcium-dependent phospholipase A2 activity	F	1	605	2	14674	0.00169717	0.00972235	12.1273	CL20341Contig1
GO:0048729	tissue morphogenesis	P	1	605	2	14674	0.00169717	0.00972235	12.1273	CL52119Contig1
GO:0048899	anterior lateral line development	P	1	605	2	14674	0.00169717	0.00972235	12.1273	CL55827Contig1
GO:0051668	localization within membrane	P	1	605	2	14674	0.00169717	0.00972235	12.1273	CL55688Contig1
GO:0060373	regulation of ventricular cardiac muscle cell membrane depolarization	P	1	605	2	14674	0.00169717	0.00972235	12.1273	CL15665Contig1
GO:0061501	cyclic-GMP-AMP synthase activity	F	1	605	2	14674	0.00169717	0.00972235	12.1273	CL66Contig1
GO:0070535	histone H2A K63-linked ubiquitination	P	1	605	2	14674	0.00169717	0.00972235	12.1273	CL18595Contig1
GO:0071226	cellular response to molecule of fungal origin	P	1	605	2	14674	0.00169717	0.00972235	12.1273	CL2033Contig1
GO:0071305	cellular response to vitamin D	P	1	605	2	14674	0.00169717	0.00972235	12.1273	CL52970Contig1
GO:0071360	cellular response to exogenous dsRNA	P	1	605	2	14674	0.00169717	0.00972235	12.1273	CL66Contig1
GO:0071504	cellular response to heparin	P	1	605	2	14674	0.00169717	0.00972235	12.1273	CL52970Contig1
GO:0071639	positive regulation of monocyte chemotactic protein-1 production	P	1	605	2	14674	0.00169717	0.00972235	12.1273	CL16373Contig1
GO:0086006	voltage-gated sodium channel activity involved in cardiac muscle cell action potential	F	1	605	2	14674	0.00169717	0.00972235	12.1273	CL15665Contig1
GO:0086080	protein binding involved in heterotypic cell-cell adhesion	F	1	605	2	14674	0.00169717	0.00972235	12.1273	CL9484Contig1
GO:0090237	regulation of arachidonic acid secretion	P	1	605	2	14674	0.00169717	0.00972235	12.1273	CL2033Contig1
GO:0090246	convergent extension involved in somitogenesis	P	1	605	2	14674	0.00169717	0.00972235	12.1273	CL52970Contig1
GO:0090336	positive regulation of brown fat cell differentiation	P	1	605	2	14674	0.00169717	0.00972235	12.1273	CL56067Contig1
GO:0097070	ductus arteriosus closure	P	1	605	2	14674	0.00169717	0.00972235	12.1273	CL58918Contig1
GO:0097113	alpha-amino-3-hydroxy-5-methyl-4-isoxazole propionate selective glutamate receptor clustering	P	1	605	2	14674	0.00169717	0.00972235	12.1273	CL13523Contig1
GO:0097454	Schwann cell microvillus	C	1	605	2	14674	0.00169717	0.00972235	12.1273	CL9484Contig1
GO:2000052	positive regulation of non-canonical Wnt signaling pathway	P	1	605	2	14674	0.00169717	0.00972235	12.1273	CL52970Contig1
GO:2000080	negative regulation of canonical Wnt signaling pathway involved in controlling type B pancreatic cell proliferation	P	1	605	2	14674	0.00169717	0.00972235	12.1273	CL52970Contig1
GO:2000117	negative regulation of cysteine-type endopeptidase activity	P	1	605	2	14674	0.00169717	0.00972235	12.1273	CL52970Contig1
GO:0032508	DNA duplex unwinding	P	4	605	22	14674	0.00172055	0.00982121	4.40992	CL59676Contig1;CL15875Contig1;CL64762Contig1;comp112356_c0_seq15
GO:0035235	ionotropic glutamate receptor signaling pathway	P	6	605	43	14674	0.00172967	0.00983828	3.38436	CL26807Contig1;CL2963Contig1;CL23639Contig1;CL72487Contig1;CL1102Contig1;CL52554Contig1
GO:0031432	titin binding	F	3	605	14	14674	0.0020574	0.011661	5.1974	CL68962Contig1;CL67774Contig1;CL56933Contig1
GO:0005030	neurotrophin receptor activity	F	2	605	7	14674	0.00215522	0.0117185	6.92987	CL29147Contig1;CL27176Contig1
GO:0017080	sodium channel regulator activity	F	2	605	7	14674	0.00215522	0.0117185	6.92987	CL15665Contig1;CL2166Contig1
GO:0030375	thyroid hormone receptor coactivator activity	F	2	605	7	14674	0.00215522	0.0117185	6.92987	CL68962Contig1;CL56933Contig1
GO:0045010	actin nucleation	P	2	605	7	14674	0.00215522	0.0117185	6.92987	CL53028Contig1;CL55088Contig1
GO:0045071	negative regulation of viral genome replication	P	2	605	7	14674	0.00215522	0.0117185	6.92987	CL22031Contig1;CL24273Contig1
GO:0045823	positive regulation of heart contraction	P	2	605	7	14674	0.00215522	0.0117185	6.92987	CL16855Contig1;CL5365Contig1
GO:0045907	positive regulation of vasoconstriction	P	2	605	7	14674	0.00215522	0.0117185	6.92987	CL13483Contig1;CL71697Contig1
GO:0046641	positive regulation of alpha-beta T cell proliferation	P	2	605	7	14674	0.00215522	0.0117185	6.92987	CL2033Contig1;comp66281_c0_seq1
GO:0060306	regulation of membrane repolarization	P	2	605	7	14674	0.00215522	0.0117185	6.92987	comp70295_c0_seq1;comp70300_c0_seq1
GO:0071625	vocalization behavior	P	2	605	7	14674	0.00215522	0.0117185	6.92987	CL55248Contig1;CL13523Contig1
GO:1901016	regulation of potassium ion transmembrane transporter activity	P	2	605	7	14674	0.00215522	0.0117185	6.92987	comp70295_c0_seq1;comp70300_c0_seq1
GO:1901017	negative regulation of potassium ion transmembrane transporter activity	P	2	605	7	14674	0.00215522	0.0117185	6.92987	CL68962Contig1;CL56933Contig1
GO:0008270	zinc ion binding	F	74	605	1317	14674	0.00243395	0.0131894	1.36282	CL59013Contig1;comp99620_c0_seq2;CL59612Contig1;comp111663_c0_seq2;CL4246Contig1;CL1798Contig1;CL13910Contig1;CL15898Contig1;CL53372Contig1;CL51548Contig1;CL7753Contig1;CL3289Contig1;CL74832Contig1;CL338Contig1;CL42339Contig1;CL58386Contig1;comp99216_c0_seq1;comp177559_c0_seq1;CL57904Contig1;CL27630Contig1;CL13846Contig1;CL58021Contig1;CL44963Contig1;CL60370Contig1;CL51801Contig1;CL12150Contig1;C…
GO:0005506	iron ion binding	F	10	605	100	14674	0.00271901	0.0146845	2.42545	CL52073Contig1;CL49906Contig1;CL18223Contig1;CL56613Contig1;CL45081Contig1;CL4969Contig1;CL67196Contig1;CL42838Contig1;CL2971Contig1;CL15597Contig1
GO:0032956	regulation of actin cytoskeleton organization	P	4	605	25	14674	0.00313434	0.0167583	3.88073	CL10939Contig1;CL73978Contig1;CL74442Contig1;CL51361Contig1
GO:0045214	sarcomere organization	P	4	605	25	14674	0.00313434	0.0167583	3.88073	CL68962Contig1;CL67774Contig1;CL56933Contig1;CL47996Contig1
GO:0048840	otolith development	P	4	605	25	14674	0.00313434	0.0167583	3.88073	CL66710Contig1;CL16855Contig1;CL57605Contig1;CL5365Contig1
GO:0055114	oxidation-reduction process	P	33	605	502	14674	0.00316006	0.0168397	1.59442	CL45726Contig1;CL59308Contig1;CL8209Contig1;CL52073Contig1;CL49906Contig1;CL58918Contig1;CL3289Contig1;CL30491Contig1;CL57904Contig1;CL58052Contig1;CL57692Contig1;CL52300Contig1;CL55935Contig1;CL18223Contig1;CL56613Contig1;CL3172Contig1;CL57908Contig1;CL45081Contig1;comp70295_c0_seq1;CL54823Contig1;comp70300_c0_seq1;CL54671Contig1;CL55476Contig1;CL67196Contig1;CL42838Contig1;CL71697Contig1;CL5493…
GO:0007339	binding of sperm to zona pellucida	P	2	605	8	14674	0.00334311	0.0172979	6.06364	CL68252Contig1;CL13592Contig1
GO:0038179	neurotrophin signaling pathway	P	2	605	8	14674	0.00334311	0.0172979	6.06364	CL29147Contig1;CL27176Contig1
GO:0043169	cation binding	F	2	605	8	14674	0.00334311	0.0172979	6.06364	CL58053Contig1;CL16711Contig1
GO:0048920	posterior lateral line neuromast primordium migration	P	2	605	8	14674	0.00334311	0.0172979	6.06364	CL51548Contig1;CL55941Contig1
GO:0050815	phosphoserine binding	F	2	605	8	14674	0.00334311	0.0172979	6.06364	comp70295_c0_seq1;comp70300_c0_seq1
GO:0050873	brown fat cell differentiation	P	2	605	8	14674	0.00334311	0.0172979	6.06364	CL16373Contig1;CL14671Contig1
GO:0051764	actin crosslink formation	P	2	605	8	14674	0.00334311	0.0172979	6.06364	CL68962Contig1;CL56933Contig1
GO:0070372	regulation of ERK1 and ERK2 cascade	P	2	605	8	14674	0.00334311	0.0172979	6.06364	CL2033Contig1;CL58386Contig1
GO:2000009	negative regulation of protein localization to cell surface	P	2	605	8	14674	0.00334311	0.0172979	6.06364	CL68962Contig1;CL56933Contig1
GO:0005576	extracellular region	C	27	605	401	14674	0.00467795	0.0188223	1.6331	CL74732Contig1;CL15735Contig1;CL42675Contig1;CL46988Contig1;CL56067Contig1;CL55754Contig1;CL75180Contig1;CL55978Contig1;CL53332Contig1;comp162224_c0_seq1;CL69664Contig1;CL52253Contig1;CL56004Contig1;CL61485Contig1;CL19349Contig1;CL32123Contig1;CL11851Contig1;CL4780Contig1;CL52281Contig1;CL51317Contig1;CL4549Contig1;CL69870Contig1;CL72172Contig1;CL48514Contig1;CL51682Contig1;CL43632Contig1;CL57509…
GO:0002089	lens morphogenesis in camera-type eye	P	2	605	9	14674	0.00486195	0.0188223	5.3899	CL51349Contig1;CL5149Contig1
GO:0002474	antigen processing and presentation of peptide antigen via MHC class I	P	2	605	9	14674	0.00486195	0.0188223	5.3899	CL25423Contig1;CL8796Contig1
GO:0004623	phospholipase A2 activity	F	2	605	9	14674	0.00486195	0.0188223	5.3899	CL47336Contig1;CL3125Contig1
GO:0015459	potassium channel regulator activity	F	2	605	9	14674	0.00486195	0.0188223	5.3899	comp70295_c0_seq1;comp70300_c0_seq1
GO:0016595	glutamate binding	F	2	605	9	14674	0.00486195	0.0188223	5.3899	CL1102Contig1;CL18310Contig1
GO:0042101	T cell receptor complex	C	2	605	9	14674	0.00486195	0.0188223	5.3899	CL2033Contig1;comp66281_c0_seq1
GO:0042605	peptide antigen binding	F	2	605	9	14674	0.00486195	0.0188223	5.3899	CL25423Contig1;CL8796Contig1
GO:0043268	positive regulation of potassium ion transport	P	2	605	9	14674	0.00486195	0.0188223	5.3899	CL68962Contig1;CL56933Contig1
GO:0043281	regulation of cysteine-type endopeptidase activity involved in apoptotic process	P	2	605	9	14674	0.00486195	0.0188223	5.3899	comp70295_c0_seq1;comp70300_c0_seq1
GO:0045822	negative regulation of heart contraction	P	2	605	9	14674	0.00486195	0.0188223	5.3899	CL16855Contig1;CL5365Contig1
GO:0001798	positive regulation of type IIa hypersensitivity	P	1	605	3	14674	0.004952	0.0188223	8.08485	CL38822Contig1
GO:0001896	autolysis	P	1	605	3	14674	0.004952	0.0188223	8.08485	CL67774Contig1
GO:0001970	positive regulation of activation of membrane attack complex	P	1	605	3	14674	0.004952	0.0188223	8.08485	CL38822Contig1
GO:0002283	neutrophil activation involved in immune response	P	1	605	3	14674	0.004952	0.0188223	8.08485	CL2033Contig1
GO:0002286	T cell activation involved in immune response	P	1	605	3	14674	0.004952	0.0188223	8.08485	CL56592Contig1
GO:0002554	serotonin secretion by platelet	P	1	605	3	14674	0.004952	0.0188223	8.08485	CL2033Contig1
GO:0003854	3-beta-hydroxy-delta5-steroid dehydrogenase activity	F	1	605	3	14674	0.004952	0.0188223	8.08485	CL54671Contig1
GO:0003870	5-aminolevulinate synthase activity	F	1	605	3	14674	0.004952	0.0188223	8.08485	CL51474Contig1
GO:0004019	adenylosuccinate synthase activity	F	1	605	3	14674	0.004952	0.0188223	8.08485	CL51818Contig1
GO:0004392	heme oxygenase (decyclizing) activity	F	1	605	3	14674	0.004952	0.0188223	8.08485	CL58979Contig1
GO:0004760	serine-pyruvate transaminase activity	F	1	605	3	14674	0.004952	0.0188223	8.08485	CL14199Contig1
GO:0004969	histamine receptor activity	F	1	605	3	14674	0.004952	0.0188223	8.08485	CL13483Contig1
GO:0005283	sodium:amino acid symporter activity	F	1	605	3	14674	0.004952	0.0188223	8.08485	CL17264Contig1
GO:0005697	telomerase holoenzyme complex	C	1	605	3	14674	0.004952	0.0188223	8.08485	CL53930Contig1
GO:0005943	phosphatidylinositol 3-kinase complex, class IA	C	1	605	3	14674	0.004952	0.0188223	8.08485	CL55052Contig1
GO:0006610	ribosomal protein import into nucleus	P	1	605	3	14674	0.004952	0.0188223	8.08485	CL53512Contig1
GO:0006625	protein targeting to peroxisome	P	1	605	3	14674	0.004952	0.0188223	8.08485	CL14199Contig1
GO:0006788	heme oxidation	P	1	605	3	14674	0.004952	0.0188223	8.08485	CL58979Contig1
GO:0006958	complement activation, classical pathway	P	1	605	3	14674	0.004952	0.0188223	8.08485	CL56004Contig1
GO:0007178	transmembrane receptor protein serine/threonine kinase signaling pathway	P	1	605	3	14674	0.004952	0.0188223	8.08485	CL74275Contig1
GO:0008020	G-protein coupled photoreceptor activity	F	1	605	3	14674	0.004952	0.0188223	8.08485	CL3169Contig1
GO:0008263	pyrimidine-specific mismatch base pair DNA N-glycosylase activity	F	1	605	3	14674	0.004952	0.0188223	8.08485	CL57901Contig1
GO:0008282	ATP-sensitive potassium channel complex	C	1	605	3	14674	0.004952	0.0188223	8.08485	CL33624Contig1
GO:0008453	alanine-glyoxylate transaminase activity	F	1	605	3	14674	0.004952	0.0188223	8.08485	CL14199Contig1
GO:0008508	bile acid:sodium symporter activity	F	1	605	3	14674	0.004952	0.0188223	8.08485	CL51542Contig1
GO:0009103	lipopolysaccharide biosynthetic process	P	1	605	3	14674	0.004952	0.0188223	8.08485	CL15524Contig1
GO:0009186	deoxyribonucleoside diphosphate metabolic process	P	1	605	3	14674	0.004952	0.0188223	8.08485	CL36394Contig1
GO:0010107	potassium ion import	P	1	605	3	14674	0.004952	0.0188223	8.08485	CL33624Contig1
GO:0010389	regulation of G2/M transition of mitotic cell cycle	P	1	605	3	14674	0.004952	0.0188223	8.08485	CL14322Contig1
GO:0010591	regulation of lamellipodium assembly	P	1	605	3	14674	0.004952	0.0188223	8.08485	CL74442Contig1
GO:0010804	negative regulation of tumor necrosis factor-mediated signaling pathway	P	1	605	3	14674	0.004952	0.0188223	8.08485	CL16373Contig1
GO:0010866	regulation of triglyceride biosynthetic process	P	1	605	3	14674	0.004952	0.0188223	8.08485	CL38822Contig1
GO:0014034	neural crest cell fate commitment	P	1	605	3	14674	0.004952	0.0188223	8.08485	CL52970Contig1
GO:0014718	positive regulation of satellite cell activation involved in skeletal muscle regeneration	P	1	605	3	14674	0.004952	0.0188223	8.08485	CL67774Contig1
GO:0014866	skeletal myofibril assembly	P	1	605	3	14674	0.004952	0.0188223	8.08485	CL47996Contig1
GO:0014912	negative regulation of smooth muscle cell migration	P	1	605	3	14674	0.004952	0.0188223	8.08485	CL16373Contig1
GO:0015180	L-alanine transmembrane transporter activity	F	1	605	3	14674	0.004952	0.0188223	8.08485	CL54593Contig1
GO:0016783	sulfurtransferase activity	F	1	605	3	14674	0.004952	0.0188223	8.08485	CL52133Contig1
GO:0021534	cell proliferation in hindbrain	P	1	605	3	14674	0.004952	0.0188223	8.08485	CL53372Contig1
GO:0021576	hindbrain formation	P	1	605	3	14674	0.004952	0.0188223	8.08485	CL5006Contig1
GO:0021761	limbic system development	P	1	605	3	14674	0.004952	0.0188223	8.08485	CL55248Contig1
GO:0021942	radial glia guided migration of Purkinje cell	P	1	605	3	14674	0.004952	0.0188223	8.08485	CL1267Contig1
GO:0022843	voltage-gated cation channel activity	F	1	605	3	14674	0.004952	0.0188223	8.08485	CL1102Contig1
GO:0030160	GKAP/Homer scaffold activity	F	1	605	3	14674	0.004952	0.0188223	8.08485	CL13523Contig1
GO:0030284	estrogen receptor activity	F	1	605	3	14674	0.004952	0.0188223	8.08485	CL51548Contig1
GO:0030595	leukocyte chemotaxis	P	1	605	3	14674	0.004952	0.0188223	8.08485	CL38931Contig1
GO:0031402	sodium ion binding	F	1	605	3	14674	0.004952	0.0188223	8.08485	CL67774Contig1
GO:0031503	protein complex localization	P	1	605	3	14674	0.004952	0.0188223	8.08485	CL44822Contig1
GO:0031577	spindle checkpoint	P	1	605	3	14674	0.004952	0.0188223	8.08485	CL44822Contig1
GO:0033188	sphingomyelin synthase activity	F	1	605	3	14674	0.004952	0.0188223	8.08485	CL2400Contig1
GO:0033691	sialic acid binding	F	1	605	3	14674	0.004952	0.0188223	8.08485	CL16373Contig1
GO:0034375	high-density lipoprotein particle remodeling	P	1	605	3	14674	0.004952	0.0188223	8.08485	CL52281Contig1
GO:0034673	inhibin-betaglycan-ActRII complex	C	1	605	3	14674	0.004952	0.0188223	8.08485	comp99963_c0_seq3
GO:0034711	inhibin binding	F	1	605	3	14674	0.004952	0.0188223	8.08485	comp99963_c0_seq3
GO:0042044	fluid transport	P	1	605	3	14674	0.004952	0.0188223	8.08485	CL14002Contig1
GO:0042165	neurotransmitter binding	F	1	605	3	14674	0.004952	0.0188223	8.08485	CL1102Contig1
GO:0042289	MHC class II protein binding	F	1	605	3	14674	0.004952	0.0188223	8.08485	CL13993Contig1
GO:0042421	norepinephrine biosynthetic process	P	1	605	3	14674	0.004952	0.0188223	8.08485	CL71697Contig1
GO:0042596	fear response	P	1	605	3	14674	0.004952	0.0188223	8.08485	CL71697Contig1
GO:0042773	ATP synthesis coupled electron transport	P	1	605	3	14674	0.004952	0.0188223	8.08485	CL15830Contig1
GO:0043084	penile erection	P	1	605	3	14674	0.004952	0.0188223	8.08485	comp99963_c0_seq3
GO:0044029	hypomethylation of CpG island	P	1	605	3	14674	0.004952	0.0188223	8.08485	CL55052Contig1
GO:0044208	'de novo' AMP biosynthetic process	P	1	605	3	14674	0.004952	0.0188223	8.08485	CL51818Contig1
GO:0044309	neuron spine	C	1	605	3	14674	0.004952	0.0188223	8.08485	CL13523Contig1
GO:0045578	negative regulation of B cell differentiation	P	1	605	3	14674	0.004952	0.0188223	8.08485	CL52970Contig1
GO:0045661	regulation of myoblast differentiation	P	1	605	3	14674	0.004952	0.0188223	8.08485	CL67774Contig1
GO:0045721	negative regulation of gluconeogenesis	P	1	605	3	14674	0.004952	0.0188223	8.08485	CL16373Contig1
GO:0045745	positive regulation of G-protein coupled receptor protein signaling pathway	P	1	605	3	14674	0.004952	0.0188223	8.08485	CL38822Contig1
GO:0045776	negative regulation of blood pressure	P	1	605	3	14674	0.004952	0.0188223	8.08485	CL16373Contig1
GO:0045806	negative regulation of endocytosis	P	1	605	3	14674	0.004952	0.0188223	8.08485	CL60568Contig1
GO:0045954	positive regulation of natural killer cell mediated cytotoxicity	P	1	605	3	14674	0.004952	0.0188223	8.08485	CL13993Contig1
GO:0046822	regulation of nucleocytoplasmic transport	P	1	605	3	14674	0.004952	0.0188223	8.08485	CL24273Contig1
GO:0046920	alpha-(1->3)-fucosyltransferase activity	F	1	605	3	14674	0.004952	0.0188223	8.08485	CL1520Contig1
GO:0047372	acylglycerol lipase activity	F	1	605	3	14674	0.004952	0.0188223	8.08485	CL52510Contig1
GO:0050765	negative regulation of phagocytosis	P	1	605	3	14674	0.004952	0.0188223	8.08485	CL16373Contig1
GO:0050805	negative regulation of synaptic transmission	P	1	605	3	14674	0.004952	0.0188223	8.08485	CL16373Contig1
GO:0050877	neurological system process	P	1	605	3	14674	0.004952	0.0188223	8.08485	CL33624Contig1
GO:0050897	cobalt ion binding	F	1	605	3	14674	0.004952	0.0188223	8.08485	comp99620_c0_seq2
GO:0051250	negative regulation of lymphocyte activation	P	1	605	3	14674	0.004952	0.0188223	8.08485	CL55089Contig1
GO:0051303	establishment of chromosome localization	P	1	605	3	14674	0.004952	0.0188223	8.08485	CL44822Contig1
GO:0051549	positive regulation of keratinocyte migration	P	1	605	3	14674	0.004952	0.0188223	8.08485	CL56191Contig1
GO:0051930	regulation of sensory perception of pain	P	1	605	3	14674	0.004952	0.0188223	8.08485	CL1102Contig1
GO:0055103	ligase regulator activity	F	1	605	3	14674	0.004952	0.0188223	8.08485	CL67774Contig1
GO:0060032	notochord regression	P	1	605	3	14674	0.004952	0.0188223	8.08485	CL53372Contig1
GO:0060092	regulation of synaptic transmission, glycinergic	P	1	605	3	14674	0.004952	0.0188223	8.08485	CL17264Contig1
GO:0060142	regulation of syncytium formation by plasma membrane fusion	P	1	605	3	14674	0.004952	0.0188223	8.08485	CL16711Contig1
GO:0060371	regulation of atrial cardiac muscle cell membrane depolarization	P	1	605	3	14674	0.004952	0.0188223	8.08485	CL15665Contig1
GO:0060513	prostatic bud formation	P	1	605	3	14674	0.004952	0.0188223	8.08485	CL53372Contig1
GO:0060527	prostate epithelial cord arborization involved in prostate glandular acinus morphogenesis	P	1	605	3	14674	0.004952	0.0188223	8.08485	CL52970Contig1
GO:0060999	positive regulation of dendritic spine development	P	1	605	3	14674	0.004952	0.0188223	8.08485	CL13523Contig1
GO:0070290	N-acylphosphatidylethanolamine-specific phospholipase D activity	F	1	605	3	14674	0.004952	0.0188223	8.08485	CL58979Contig1
GO:0070315	G1 to G0 transition involved in cell differentiation	P	1	605	3	14674	0.004952	0.0188223	8.08485	CL67774Contig1
GO:0071472	cellular response to salt stress	P	1	605	3	14674	0.004952	0.0188223	8.08485	CL67774Contig1
GO:0097264	self proteolysis	P	1	605	3	14674	0.004952	0.0188223	8.08485	CL67774Contig1
GO:1900103	positive regulation of endoplasmic reticulum unfolded protein response	P	1	605	3	14674	0.004952	0.0188223	8.08485	CL54204Contig1
GO:2000041	negative regulation of planar cell polarity pathway involved in axis elongation	P	1	605	3	14674	0.004952	0.0188223	8.08485	CL52970Contig1
GO:2000270	negative regulation of fibroblast apoptotic process	P	1	605	3	14674	0.004952	0.0188223	8.08485	CL52970Contig1
GO:2000481	positive regulation of cAMP-dependent protein kinase activity	P	1	605	3	14674	0.004952	0.0188223	8.08485	CL16373Contig1
GO:2000649	regulation of sodium ion transmembrane transporter activity	P	1	605	3	14674	0.004952	0.0188223	8.08485	CL15665Contig1
GO:2000653	regulation of genetic imprinting	P	1	605	3	14674	0.004952	0.0188223	8.08485	CL55052Contig1
GO:2000821	regulation of grooming behavior	P	1	605	3	14674	0.004952	0.0188223	8.08485	CL13523Contig1
GO:0009408	response to heat	P	3	605	18	14674	0.00551661	0.0208203	4.04242	CL73519Contig1;CL56728Contig1;CL51618Contig1
GO:0050808	synapse organization	P	3	605	18	14674	0.00551661	0.0208203	4.04242	CL16242Contig1;CL56296Contig1;CL9484Contig1
GO:0086091	regulation of heart rate by cardiac conduction	P	3	605	18	14674	0.00551661	0.0208203	4.04242	CL15665Contig1;comp70295_c0_seq1;comp70300_c0_seq1
GO:0032580	Golgi cisterna membrane	C	5	605	40	14674	0.00556655	0.0209595	3.03182	CL49344Contig1;CL1520Contig1;CL16085Contig1;CL44875Contig1;CL9299Contig1
GO:0007368	determination of left/right symmetry	P	6	605	53	14674	0.00580651	0.0218118	2.7458	CL66710Contig1;comp99963_c0_seq3;CL16855Contig1;CL52047Contig1;comp12586_c0_seq1;CL5365Contig1
GO:0002026	regulation of the force of heart contraction	P	2	605	10	14674	0.00673459	0.0247113	4.85091	CL16855Contig1;CL5365Contig1
GO:0007159	leukocyte cell-cell adhesion	P	2	605	10	14674	0.00673459	0.0247113	4.85091	CL2033Contig1;CL53574Contig1
GO:0007612	learning	P	2	605	10	14674	0.00673459	0.0247113	4.85091	CL13523Contig1;CL43506Contig1
GO:0008081	phosphoric diester hydrolase activity	F	2	605	10	14674	0.00673459	0.0247113	4.85091	CL1809Contig1;CL13727Contig1
GO:0009190	cyclic nucleotide biosynthetic process	P	2	605	10	14674	0.00673459	0.0247113	4.85091	CL47996Contig1;CL66Contig1
GO:0016494	C-X-C chemokine receptor activity	F	2	605	10	14674	0.00673459	0.0247113	4.85091	CL55941Contig1;CL58279Contig1
GO:0019226	transmission of nerve impulse	P	2	605	10	14674	0.00673459	0.0247113	4.85091	CL55248Contig1;CL9484Contig1
GO:0030274	LIM domain binding	F	2	605	10	14674	0.00673459	0.0247113	4.85091	CL68962Contig1;CL56933Contig1
GO:0043124	negative regulation of I-kappaB kinase/NF-kappaB signaling	P	2	605	10	14674	0.00673459	0.0247113	4.85091	CL327Contig1;CL16373Contig1
GO:0060030	dorsal convergence	P	2	605	10	14674	0.00673459	0.0247113	4.85091	CL75180Contig1;CL57605Contig1
GO:0007166	cell surface receptor signaling pathway	P	3	605	19	14674	0.00676326	0.0247113	3.82967	CL13993Contig1;CL8377Contig1;CL50754Contig1
GO:0030917	midbrain-hindbrain boundary development	P	3	605	19	14674	0.00676326	0.0247113	3.82967	CL66710Contig1;CL16855Contig1;CL5365Contig1
GO:0001654	eye development	P	4	605	30	14674	0.00709691	0.0258715	3.23394	CL15504Contig1;CL68962Contig1;CL56933Contig1;CL52970Contig1
GO:0004930	G-protein coupled receptor activity	F	14	605	179	14674	0.00726195	0.0264131	1.897	comp42969_c0_seq1;CL56578Contig1;CL3908Contig1;CL16165Contig1;CL4157Contig1;CL54756Contig1;CL33750Contig1;CL42148Contig1;CL43506Contig1;CL31250Contig1;CL56559Contig1;CL34343Contig1;CL670Contig1;CL18310Contig1
GO:0003143	embryonic heart tube morphogenesis	P	3	605	20	14674	0.00818294	0.0296285	3.63818	CL66710Contig1;CL16855Contig1;CL5365Contig1
GO:0032321	positive regulation of Rho GTPase activity	P	3	605	20	14674	0.00818294	0.0296285	3.63818	CL10939Contig1;CL73978Contig1;CL51361Contig1
GO:0017124	SH3 domain binding	F	6	605	57	14674	0.0086504	0.0297159	2.55311	CL14095Contig1;CL39382Contig1;CL13523Contig1;CL16085Contig1;CL53499Contig1;CL44198Contig1
GO:0021545	cranial nerve development	P	2	605	11	14674	0.00897929	0.0297159	4.40992	CL55688Contig1;CL56191Contig1
GO:0034976	response to endoplasmic reticulum stress	P	2	605	11	14674	0.00897929	0.0297159	4.40992	CL60568Contig1;CL59308Contig1
GO:0042119	neutrophil activation	P	2	605	11	14674	0.00897929	0.0297159	4.40992	CL55941Contig1;CL58279Contig1
GO:0043267	negative regulation of potassium ion transport	P	2	605	11	14674	0.00897929	0.0297159	4.40992	CL68962Contig1;CL56933Contig1
GO:0048041	focal adhesion assembly	P	2	605	11	14674	0.00897929	0.0297159	4.40992	CL68962Contig1;CL56933Contig1
GO:0003887	DNA-directed DNA polymerase activity	F	4	605	32	14674	0.00937427	0.0297159	3.03182	CL51600Contig1;comp112590_c1_seq4;comp8250_c0_seq1;CL17768Contig1
GO:0000003	reproduction	P	1	605	4	14674	0.00963358	0.0297159	6.06364	CL16071Contig1
GO:0000138	Golgi trans cisterna	C	1	605	4	14674	0.00963358	0.0297159	6.06364	CL2400Contig1
GO:0000439	core TFIIH complex	C	1	605	4	14674	0.00963358	0.0297159	6.06364	CL57241Contig1
GO:0001573	ganglioside metabolic process	P	1	605	4	14674	0.00963358	0.0297159	6.06364	CL890Contig1
GO:0002098	tRNA wobble uridine modification	P	1	605	4	14674	0.00963358	0.0297159	6.06364	CL52133Contig1
GO:0002175	protein localization to paranode region of axon	P	1	605	4	14674	0.00963358	0.0297159	6.06364	CL9484Contig1
GO:0002574	thrombocyte differentiation	P	1	605	4	14674	0.00963358	0.0297159	6.06364	CL57605Contig1
GO:0003417	growth plate cartilage development	P	1	605	4	14674	0.00963358	0.0297159	6.06364	CL13429Contig1
GO:0004022	alcohol dehydrogenase (NAD) activity	F	1	605	4	14674	0.00963358	0.0297159	6.06364	CL57904Contig1
GO:0004465	lipoprotein lipase activity	F	1	605	4	14674	0.00963358	0.0297159	6.06364	CL52281Contig1
GO:0004630	phospholipase D activity	F	1	605	4	14674	0.00963358	0.0297159	6.06364	CL58979Contig1
GO:0004829	threonine-tRNA ligase activity	F	1	605	4	14674	0.00963358	0.0297159	6.06364	CL17196Contig1
GO:0004994	somatostatin receptor activity	F	1	605	4	14674	0.00963358	0.0297159	6.06364	CL287Contig1
GO:0005173	stem cell factor receptor binding	F	1	605	4	14674	0.00963358	0.0297159	6.06364	CL43632Contig1
GO:0005861	troponin complex	C	1	605	4	14674	0.00963358	0.0297159	6.06364	CL9566Contig1
GO:0006435	threonyl-tRNA aminoacylation	P	1	605	4	14674	0.00963358	0.0297159	6.06364	CL17196Contig1
GO:0006883	cellular sodium ion homeostasis	P	1	605	4	14674	0.00963358	0.0297159	6.06364	CL2166Contig1
GO:0007167	enzyme linked receptor protein signaling pathway	P	1	605	4	14674	0.00963358	0.0297159	6.06364	CL2033Contig1
GO:0007442	hindgut morphogenesis	P	1	605	4	14674	0.00963358	0.0297159	6.06364	CL53372Contig1
GO:0008188	neuropeptide receptor activity	F	1	605	4	14674	0.00963358	0.0297159	6.06364	CL184Contig1
GO:0008241	peptidyl-dipeptidase activity	F	1	605	4	14674	0.00963358	0.0297159	6.06364	CL56572Contig1
GO:0008417	fucosyltransferase activity	F	1	605	4	14674	0.00963358	0.0297159	6.06364	CL49344Contig1
GO:0009913	epidermal cell differentiation	P	1	605	4	14674	0.00963358	0.0297159	6.06364	CL53372Contig1
GO:0010564	regulation of cell cycle process	P	1	605	4	14674	0.00963358	0.0297159	6.06364	CL52970Contig1
GO:0010828	positive regulation of glucose transport	P	1	605	4	14674	0.00963358	0.0297159	6.06364	CL38822Contig1
GO:0010875	positive regulation of cholesterol efflux	P	1	605	4	14674	0.00963358	0.0297159	6.06364	CL16373Contig1
GO:0010884	positive regulation of lipid storage	P	1	605	4	14674	0.00963358	0.0297159	6.06364	CL38822Contig1
GO:0015111	iodide transmembrane transporter activity	F	1	605	4	14674	0.00963358	0.0297159	6.06364	CL50111Contig1
GO:0015272	ATP-activated inward rectifier potassium channel activity	F	1	605	4	14674	0.00963358	0.0297159	6.06364	CL33624Contig1
GO:0015297	antiporter activity	F	1	605	4	14674	0.00963358	0.0297159	6.06364	CL1152Contig1
GO:0015321	sodium-dependent phosphate transmembrane transporter activity	F	1	605	4	14674	0.00963358	0.0297159	6.06364	CL69045Contig1
GO:0015721	bile acid and bile salt transport	P	1	605	4	14674	0.00963358	0.0297159	6.06364	CL51542Contig1
GO:0015808	L-alanine transport	P	1	605	4	14674	0.00963358	0.0297159	6.06364	CL54593Contig1
GO:0016052	carbohydrate catabolic process	P	1	605	4	14674	0.00963358	0.0297159	6.06364	CL55476Contig1
GO:0016075	rRNA catabolic process	P	1	605	4	14674	0.00963358	0.0297159	6.06364	CL54131Contig1
GO:0016901	oxidoreductase activity, acting on the CH-OH group of donors, quinone or similar compound as acceptor	F	1	605	4	14674	0.00963358	0.0297159	6.06364	CL69870Contig1
GO:0019388	galactose catabolic process	P	1	605	4	14674	0.00963358	0.0297159	6.06364	CL53724Contig1
GO:0021775	smoothened signaling pathway involved in ventral spinal cord interneuron specification	P	1	605	4	14674	0.00963358	0.0297159	6.06364	CL53372Contig1
GO:0021776	smoothened signaling pathway involved in spinal cord motor neuron cell fate specification	P	1	605	4	14674	0.00963358	0.0297159	6.06364	CL53372Contig1
GO:0022601	menstrual cycle phase	P	1	605	4	14674	0.00963358	0.0297159	6.06364	CL52970Contig1
GO:0031095	platelet dense tubular network membrane	C	1	605	4	14674	0.00963358	0.0297159	6.06364	CL74442Contig1
GO:0031995	insulin-like growth factor II binding	F	1	605	4	14674	0.00963358	0.0297159	6.06364	CL52253Contig1
GO:0032232	negative regulation of actin filament bundle assembly	P	1	605	4	14674	0.00963358	0.0297159	6.06364	CL13523Contig1
GO:0032940	secretion by cell	P	1	605	4	14674	0.00963358	0.0297159	6.06364	CL55089Contig1
GO:0034227	tRNA thio-modification	P	1	605	4	14674	0.00963358	0.0297159	6.06364	CL52133Contig1
GO:0038170	somatostatin signaling pathway	P	1	605	4	14674	0.00963358	0.0297159	6.06364	CL287Contig1
GO:0042578	phosphoric ester hydrolase activity	F	1	605	4	14674	0.00963358	0.0297159	6.06364	CL56578Contig1
GO:0042713	sperm ejaculation	P	1	605	4	14674	0.00963358	0.0297159	6.06364	comp99963_c0_seq3
GO:0043141	ATP-dependent 5'-3' DNA helicase activity	F	1	605	4	14674	0.00963358	0.0297159	6.06364	CL176Contig1
GO:0043546	molybdopterin cofactor binding	F	1	605	4	14674	0.00963358	0.0297159	6.06364	CL67196Contig1
GO:0044341	sodium-dependent phosphate transport	P	1	605	4	14674	0.00963358	0.0297159	6.06364	CL69045Contig1
GO:0045095	keratin filament	C	1	605	4	14674	0.00963358	0.0297159	6.06364	CL15204Contig1
GO:0045162	clustering of voltage-gated sodium channels	P	1	605	4	14674	0.00963358	0.0297159	6.06364	CL9484Contig1
GO:0045715	negative regulation of low-density lipoprotein particle receptor biosynthetic process	P	1	605	4	14674	0.00963358	0.0297159	6.06364	CL16373Contig1
GO:0045900	negative regulation of translational elongation	P	1	605	4	14674	0.00963358	0.0297159	6.06364	CL18595Contig1
GO:0047493	ceramide cholinephosphotransferase activity	F	1	605	4	14674	0.00963358	0.0297159	6.06364	CL2400Contig1
GO:0048488	synaptic vesicle endocytosis	P	1	605	4	14674	0.00963358	0.0297159	6.06364	CL52094Contig1
GO:0050764	regulation of phagocytosis	P	1	605	4	14674	0.00963358	0.0297159	6.06364	CL2033Contig1
GO:0050966	detection of mechanical stimulus involved in sensory perception of pain	P	1	605	4	14674	0.00963358	0.0297159	6.06364	CL1102Contig1
GO:0055091	phospholipid homeostasis	P	1	605	4	14674	0.00963358	0.0297159	6.06364	CL52281Contig1
GO:0060011	Sertoli cell proliferation	P	1	605	4	14674	0.00963358	0.0297159	6.06364	comp99963_c0_seq3
GO:0060666	dichotomous subdivision of terminal units involved in salivary gland branching	P	1	605	4	14674	0.00963358	0.0297159	6.06364	CL5783Contig1
GO:0070208	protein heterotrimerization	P	1	605	4	14674	0.00963358	0.0297159	6.06364	CL16373Contig1
GO:0071481	cellular response to X-ray	P	1	605	4	14674	0.00963358	0.0297159	6.06364	CL52970Contig1
GO:0072657	protein localization to membrane	P	1	605	4	14674	0.00963358	0.0297159	6.06364	CL67774Contig1
GO:0097107	postsynaptic density assembly	P	1	605	4	14674	0.00963358	0.0297159	6.06364	CL13523Contig1
GO:0097481	neuronal postsynaptic density	C	1	605	4	14674	0.00963358	0.0297159	6.06364	CL13523Contig1
GO:1902043	positive regulation of extrinsic apoptotic signaling pathway via death domain receptors	P	1	605	4	14674	0.00963358	0.0297159	6.06364	CL52970Contig1
GO:2000054	negative regulation of Wnt signaling pathway involved in dorsal/ventral axis specification	P	1	605	4	14674	0.00963358	0.0297159	6.06364	CL52970Contig1
GO:2000279	negative regulation of DNA biosynthetic process	P	1	605	4	14674	0.00963358	0.0297159	6.06364	CL16373Contig1
GO:0004198	calcium-dependent cysteine-type endopeptidase activity	F	3	605	21	14674	0.00978465	0.030124	3.46494	CL54447Contig1;CL50774Contig1;CL67774Contig1
GO:0004523	RNA-DNA hybrid ribonuclease activity	F	3	605	22	14674	0.0115767	0.0351372	3.30744	comp112590_c1_seq4;CL17768Contig1;CL53826Contig1
GO:0051017	actin filament bundle assembly	P	3	605	22	14674	0.0115767	0.0351372	3.30744	CL68962Contig1;CL56933Contig1;CL74442Contig1
GO:0006694	steroid biosynthetic process	P	2	605	12	14674	0.0116102	0.0351372	4.04242	CL54671Contig1;CL15597Contig1
GO:0006695	cholesterol biosynthetic process	P	2	605	12	14674	0.0116102	0.0351372	4.04242	CL54823Contig1;CL54824Contig1
GO:0006805	xenobiotic metabolic process	P	2	605	12	14674	0.0116102	0.0351372	4.04242	CL47151Contig1;CL71432Contig1
GO:0018149	peptide cross-linking	P	2	605	12	14674	0.0116102	0.0351372	4.04242	CL52409Contig1;CL69343Contig1
GO:0032835	glomerulus development	P	2	605	12	14674	0.0116102	0.0351372	4.04242	CL53372Contig1;CL7671Contig1
GO:0035095	behavioral response to nicotine	P	2	605	12	14674	0.0116102	0.0351372	4.04242	CL51524Contig1;CL52723Contig1
GO:0050890	cognition	P	2	605	12	14674	0.0116102	0.0351372	4.04242	CL54593Contig1;CL1890Contig1
GO:0020037	heme binding	F	8	605	90	14674	0.0117744	0.0355672	2.15596	CL52073Contig1;CL49906Contig1;CL56613Contig1;CL4969Contig1;CL42838Contig1;CL2971Contig1;CL15597Contig1;CL3624Contig1
GO:0009615	response to virus	P	4	605	34	14674	0.0121098	0.0364431	2.85348	CL35022Contig1;CL15924Contig1;CL13592Contig1;CL51095Contig1
GO:0016042	lipid catabolic process	P	4	605	34	14674	0.0121098	0.0364431	2.85348	CL46988Contig1;CL47151Contig1;CL71432Contig1;CL3125Contig1
GO:0044325	ion channel binding	F	6	605	61	14674	0.0124038	0.0372577	2.38569	CL15665Contig1;CL68962Contig1;CL33624Contig1;comp70295_c0_seq1;comp70300_c0_seq1;CL56933Contig1
GO:0005328	neurotransmitter:sodium symporter activity	F	3	605	23	14674	0.0135665	0.0405984	3.16364	CL2744Contig1;CL17264Contig1;CL15039Contig1
GO:0045740	positive regulation of DNA replication	P	3	605	23	14674	0.0135665	0.0405984	3.16364	CL20341Contig1;CL47336Contig1;CL53372Contig1
GO:0008080	N-acetyltransferase activity	F	4	605	35	14674	0.0136614	0.0407302	2.77195	comp111663_c0_seq2;CL67791Contig1;CL229Contig1;comp218086_c0_seq1
GO:0048741	skeletal muscle fiber development	P	4	605	35	14674	0.0136614	0.0407302	2.77195	CL13263Contig1;CL68962Contig1;comp62502_c0_seq1;CL56933Contig1
GO:0005975	carbohydrate metabolic process	P	7	605	77	14674	0.0137854	0.0408696	2.20496	CL58053Contig1;CL55754Contig1;CL2290Contig1;CL16711Contig1;CL1895Contig1;CL69870Contig1;CL15787Contig1
GO:0035023	regulation of Rho protein signal transduction	P	9	605	109	14674	0.0144861	0.0408696	2.00267	CL16349Contig1;CL61982Contig1;CL67747Contig1;CL53704Contig1;CL47996Contig1;CL39499Contig1;CL53944Contig1;comp191925_c0_seq1;CL12619Contig1
GO:0001669	acrosomal vesicle	C	2	605	13	14674	0.0146376	0.0408696	3.73147	CL14095Contig1;CL58447Contig1
GO:0004601	peroxidase activity	F	2	605	13	14674	0.0146376	0.0408696	3.73147	CL3624Contig1;CL1038Contig1
GO:0005024	transforming growth factor beta-activated receptor activity	F	2	605	13	14674	0.0146376	0.0408696	3.73147	CL74275Contig1;comp99963_c0_seq3
GO:0005606	laminin-1 complex	C	2	605	13	14674	0.0146376	0.0408696	3.73147	CL53522Contig1;CL14671Contig1
GO:0007585	respiratory gaseous exchange	P	2	605	13	14674	0.0146376	0.0408696	3.73147	CL44875Contig1;CL9299Contig1
GO:0015758	glucose transport	P	2	605	13	14674	0.0146376	0.0408696	3.73147	CL20341Contig1;CL47336Contig1
GO:0016203	muscle attachment	P	2	605	13	14674	0.0146376	0.0408696	3.73147	CL53522Contig1;CL14671Contig1
GO:0031514	motile cilium	C	2	605	13	14674	0.0146376	0.0408696	3.73147	CL68252Contig1;CL58447Contig1
GO:0045995	regulation of embryonic development	P	2	605	13	14674	0.0146376	0.0408696	3.73147	CL53522Contig1;CL14671Contig1
GO:0046676	negative regulation of insulin secretion	P	2	605	13	14674	0.0146376	0.0408696	3.73147	CL33624Contig1;CL52970Contig1
GO:0048593	camera-type eye morphogenesis	P	2	605	13	14674	0.0146376	0.0408696	3.73147	CL73519Contig1;CL56728Contig1
GO:0048884	neuromast development	P	2	605	13	14674	0.0146376	0.0408696	3.73147	CL57605Contig1;CL55827Contig1
GO:0002250	adaptive immune response	P	1	605	5	14674	0.0156191	0.0408696	4.85091	CL2033Contig1
GO:0002281	macrophage activation involved in immune response	P	1	605	5	14674	0.0156191	0.0408696	4.85091	CL2033Contig1
GO:0002934	desmosome organization	P	1	605	5	14674	0.0156191	0.0408696	4.85091	CL5149Contig1
GO:0004308	exo-alpha-sialidase activity	F	1	605	5	14674	0.0156191	0.0408696	4.85091	CL890Contig1
GO:0004614	phosphoglucomutase activity	F	1	605	5	14674	0.0156191	0.0408696	4.85091	CL53724Contig1
GO:0004972	N-methyl-D-aspartate selective glutamate receptor activity	F	1	605	5	14674	0.0156191	0.0408696	4.85091	CL1102Contig1
GO:0005095	GTPase inhibitor activity	F	1	605	5	14674	0.0156191	0.0408696	4.85091	CL327Contig1
GO:0005432	calcium:sodium antiporter activity	F	1	605	5	14674	0.0156191	0.0408696	4.85091	CL14002Contig1
GO:0005740	mitochondrial envelope	C	1	605	5	14674	0.0156191	0.0408696	4.85091	CL51660Contig1
GO:0006782	protoporphyrinogen IX biosynthetic process	P	1	605	5	14674	0.0156191	0.0408696	4.85091	CL51474Contig1
GO:0007095	mitotic G2 DNA damage checkpoint	P	1	605	5	14674	0.0156191	0.0408696	4.85091	CL57901Contig1
GO:0009253	peptidoglycan catabolic process	P	1	605	5	14674	0.0156191	0.0408696	4.85091	CL7753Contig1
GO:0010159	specification of organ position	P	1	605	5	14674	0.0156191	0.0408696	4.85091	CL75180Contig1
GO:0010745	negative regulation of macrophage derived foam cell differentiation	P	1	605	5	14674	0.0156191	0.0408696	4.85091	CL16373Contig1
GO:0014059	regulation of dopamine secretion	P	1	605	5	14674	0.0156191	0.0408696	4.85091	CL56296Contig1
GO:0014731	spectrin-associated cytoskeleton	C	1	605	5	14674	0.0156191	0.0408696	4.85091	CL74442Contig1
GO:0015057	thrombin receptor activity	F	1	605	5	14674	0.0156191	0.0408696	4.85091	CL2689Contig1
GO:0015705	iodide transport	P	1	605	5	14674	0.0156191	0.0408696	4.85091	CL50111Contig1
GO:0016702	oxidoreductase activity, acting on single donors with incorporation of molecular oxygen, incorporation of two atoms of oxygen	F	1	605	5	14674	0.0156191	0.0408696	4.85091	CL18223Contig1
GO:0021516	dorsal spinal cord development	P	1	605	5	14674	0.0156191	0.0408696	4.85091	CL51682Contig1
GO:0021756	striatum development	P	1	605	5	14674	0.0156191	0.0408696	4.85091	CL55248Contig1
GO:0030215	semaphorin receptor binding	F	1	605	5	14674	0.0156191	0.0408696	4.85091	CL5783Contig1
GO:0031466	Cul5-RING ubiquitin ligase complex	C	1	605	5	14674	0.0156191	0.0408696	4.85091	CL3483Contig1
GO:0031953	negative regulation of protein autophosphorylation	P	1	605	5	14674	0.0156191	0.0408696	4.85091	CL16373Contig1
GO:0032133	chromosome passenger complex	C	1	605	5	14674	0.0156191	0.0408696	4.85091	CL44822Contig1
GO:0033270	paranode region of axon	C	1	605	5	14674	0.0156191	0.0408696	4.85091	CL9484Contig1
GO:0034383	low-density lipoprotein particle clearance	P	1	605	5	14674	0.0156191	0.0408696	4.85091	CL16373Contig1
GO:0035257	nuclear hormone receptor binding	F	1	605	5	14674	0.0156191	0.0408696	4.85091	CL55298Contig1
GO:0042221	response to chemical	P	1	605	5	14674	0.0156191	0.0408696	4.85091	CL58979Contig1
GO:0042403	thyroid hormone metabolic process	P	1	605	5	14674	0.0156191	0.0408696	4.85091	CL52119Contig1
GO:0042562	hormone binding	F	1	605	5	14674	0.0156191	0.0408696	4.85091	CL51548Contig1
GO:0042761	very long-chain fatty acid biosynthetic process	P	1	605	5	14674	0.0156191	0.0408696	4.85091	CL22615Contig1
GO:0042866	pyruvate biosynthetic process	P	1	605	5	14674	0.0156191	0.0408696	4.85091	CL14199Contig1
GO:0043306	positive regulation of mast cell degranulation	P	1	605	5	14674	0.0156191	0.0408696	4.85091	CL2033Contig1
GO:0045576	mast cell activation	P	1	605	5	14674	0.0156191	0.0408696	4.85091	CL327Contig1
GO:0045579	positive regulation of B cell differentiation	P	1	605	5	14674	0.0156191	0.0408696	4.85091	CL2033Contig1
GO:0045588	positive regulation of gamma-delta T cell differentiation	P	1	605	5	14674	0.0156191	0.0408696	4.85091	CL2033Contig1
GO:0045780	positive regulation of bone resorption	P	1	605	5	14674	0.0156191	0.0408696	4.85091	CL2033Contig1
GO:0045956	positive regulation of calcium ion-dependent exocytosis	P	1	605	5	14674	0.0156191	0.0408696	4.85091	CL60568Contig1
GO:0046928	regulation of neurotransmitter secretion	P	1	605	5	14674	0.0156191	0.0408696	4.85091	CL56296Contig1
GO:0048246	macrophage chemotaxis	P	1	605	5	14674	0.0156191	0.0408696	4.85091	CL44463Contig1
GO:0048513	organ development	P	1	605	5	14674	0.0156191	0.0408696	4.85091	comp97737_c0_seq1
GO:0048618	post-embryonic foregut morphogenesis	P	1	605	5	14674	0.0156191	0.0408696	4.85091	CL53372Contig1
GO:0048872	homeostasis of number of cells	P	1	605	5	14674	0.0156191	0.0408696	4.85091	CL52119Contig1
GO:0050927	positive regulation of positive chemotaxis	P	1	605	5	14674	0.0156191	0.0408696	4.85091	CL19349Contig1
GO:0051823	regulation of synapse structural plasticity	P	1	605	5	14674	0.0156191	0.0408696	4.85091	CL1267Contig1
GO:0051835	positive regulation of synapse structural plasticity	P	1	605	5	14674	0.0156191	0.0408696	4.85091	CL13523Contig1
GO:0055005	ventricular cardiac myofibril assembly	P	1	605	5	14674	0.0156191	0.0408696	4.85091	CL57294Contig1
GO:0055081	anion homeostasis	P	1	605	5	14674	0.0156191	0.0408696	4.85091	CL55371Contig1
GO:0060068	vagina development	P	1	605	5	14674	0.0156191	0.0408696	4.85091	CL55089Contig1
GO:0060603	mammary gland duct morphogenesis	P	1	605	5	14674	0.0156191	0.0408696	4.85091	CL53372Contig1
GO:0060687	regulation of branching involved in prostate gland morphogenesis	P	1	605	5	14674	0.0156191	0.0408696	4.85091	CL52970Contig1
GO:0070306	lens fiber cell differentiation	P	1	605	5	14674	0.0156191	0.0408696	4.85091	CL51349Contig1
GO:0070530	K63-linked polyubiquitin binding	F	1	605	5	14674	0.0156191	0.0408696	4.85091	CL18595Contig1
GO:0071109	superior temporal gyrus development	P	1	605	5	14674	0.0156191	0.0408696	4.85091	CL55248Contig1
GO:0071257	cellular response to electrical stimulus	P	1	605	5	14674	0.0156191	0.0408696	4.85091	CL51818Contig1
GO:0071380	cellular response to prostaglandin E stimulus	P	1	605	5	14674	0.0156191	0.0408696	4.85091	CL52970Contig1
GO:0086014	atrial cardiac muscle cell action potential	P	1	605	5	14674	0.0156191	0.0408696	4.85091	CL15665Contig1
GO:0090050	positive regulation of cell migration involved in sprouting angiogenesis	P	1	605	5	14674	0.0156191	0.0408696	4.85091	CL2033Contig1
GO:0090330	regulation of platelet aggregation	P	1	605	5	14674	0.0156191	0.0408696	4.85091	CL2033Contig1
GO:2000601	positive regulation of Arp2/3 complex-mediated actin nucleation	P	1	605	5	14674	0.0156191	0.0408696	4.85091	CL38931Contig1
GO:0048854	brain morphogenesis	P	3	605	24	14674	0.015761	0.0411737	3.03182	CL1267Contig1;CL56835Contig1;CL13523Contig1
GO:0005216	ion channel activity	F	2	605	14	14674	0.0180686	0.0469724	3.46494	CL15990Contig1;CL14364Contig1
GO:0005811	lipid particle	C	2	605	14	14674	0.0180686	0.0469724	3.46494	CL54671Contig1;CL54824Contig1
GO:0071542	dopaminergic neuron differentiation	P	2	605	14	14674	0.0180686	0.0469724	3.46494	CL51349Contig1;CL56296Contig1
GO:0006887	exocytosis	P	4	605	38	14674	0.0191026	0.0495001	2.55311	CL60568Contig1;CL43342Contig1;CL3289Contig1;CL1367Contig1
GO:0042462	eye photoreceptor cell development	P	4	605	38	14674	0.0191026	0.0495001	2.55311	CL35022Contig1;CL3169Contig1;CL7671Contig1;CL51095Contig1
GO:0004222	metalloendopeptidase activity	F	9	605	115	14674	0.0203888	0.0527477	1.89818	CL13846Contig1;CL45178Contig1;CL53260Contig1;CL16071Contig1;CL22723Contig1;CL46101Contig1;CL46057Contig1;CL55132Contig1;CL1038Contig1
GO:0001772	immunological synapse	C	2	605	15	14674	0.021907	0.0536081	3.23394	comp66281_c0_seq1;CL327Contig1
GO:0008009	chemokine activity	F	2	605	15	14674	0.021907	0.0536081	3.23394	CL74732Contig1;CL72172Contig1
GO:0004521	endoribonuclease activity	F	1	605	6	14674	0.0227935	0.0536081	4.04242	CL54204Contig1
GO:0004622	lysophospholipase activity	F	1	605	6	14674	0.0227935	0.0536081	4.04242	CL3125Contig1
GO:0004656	procollagen-proline 4-dioxygenase activity	F	1	605	6	14674	0.0227935	0.0536081	4.04242	CL18223Contig1
GO:0005579	membrane attack complex	C	1	605	6	14674	0.0227935	0.0536081	4.04242	CL56563Contig1
GO:0005641	nuclear envelope lumen	C	1	605	6	14674	0.0227935	0.0536081	4.04242	CL69045Contig1
GO:0006596	polyamine biosynthetic process	P	1	605	6	14674	0.0227935	0.0536081	4.04242	CL35022Contig1
GO:0006654	phosphatidic acid biosynthetic process	P	1	605	6	14674	0.0227935	0.0536081	4.04242	CL20341Contig1
GO:0006665	sphingolipid metabolic process	P	1	605	6	14674	0.0227935	0.0536081	4.04242	CL20059Contig1
GO:0006686	sphingomyelin biosynthetic process	P	1	605	6	14674	0.0227935	0.0536081	4.04242	CL2400Contig1
GO:0006855	drug transmembrane transport	P	1	605	6	14674	0.0227935	0.0536081	4.04242	CL1152Contig1
GO:0008762	UDP-N-acetylmuramate dehydrogenase activity	F	1	605	6	14674	0.0227935	0.0536081	4.04242	CL67196Contig1
GO:0009826	unidimensional cell growth	P	1	605	6	14674	0.0227935	0.0536081	4.04242	CL57605Contig1
GO:0015026	coreceptor activity	F	1	605	6	14674	0.0227935	0.0536081	4.04242	comp99963_c0_seq3
GO:0015187	glycine transmembrane transporter activity	F	1	605	6	14674	0.0227935	0.0536081	4.04242	CL17264Contig1
GO:0015238	drug transmembrane transporter activity	F	1	605	6	14674	0.0227935	0.0536081	4.04242	CL1152Contig1
GO:0015816	glycine transport	P	1	605	6	14674	0.0227935	0.0536081	4.04242	CL17264Contig1
GO:0016811	hydrolase activity, acting on carbon-nitrogen (but not peptide) bonds, in linear amides	F	1	605	6	14674	0.0227935	0.0536081	4.04242	CL37903Contig1
GO:0017146	N-methyl-D-aspartate selective glutamate receptor complex	C	1	605	6	14674	0.0227935	0.0536081	4.04242	CL1102Contig1
GO:0019031	viral envelope	C	1	605	6	14674	0.0227935	0.0536081	4.04242	CL55978Contig1
GO:0019509	L-methionine biosynthetic process from methylthioadenosine	P	1	605	6	14674	0.0227935	0.0536081	4.04242	CL58386Contig1
GO:0019882	antigen processing and presentation	P	1	605	6	14674	0.0227935	0.0536081	4.04242	CL38853Contig1
GO:0021938	smoothened signaling pathway involved in regulation of cerebellar granule cell precursor cell proliferation	P	1	605	6	14674	0.0227935	0.0536081	4.04242	CL53372Contig1
GO:0021965	spinal cord ventral commissure morphogenesis	P	1	605	6	14674	0.0227935	0.0536081	4.04242	CL53372Contig1
GO:0030285	integral component of synaptic vesicle membrane	C	1	605	6	14674	0.0227935	0.0536081	4.04242	CL52094Contig1
GO:0030478	actin cap	C	1	605	6	14674	0.0227935	0.0536081	4.04242	CL38931Contig1
GO:0030510	regulation of BMP signaling pathway	P	1	605	6	14674	0.0227935	0.0536081	4.04242	comp99963_c0_seq3
GO:0030516	regulation of axon extension	P	1	605	6	14674	0.0227935	0.0536081	4.04242	CL55941Contig1
GO:0030667	secretory granule membrane	C	1	605	6	14674	0.0227935	0.0536081	4.04242	CL43342Contig1
GO:0030913	paranodal junction assembly	P	1	605	6	14674	0.0227935	0.0536081	4.04242	CL9484Contig1
GO:0031201	SNARE complex	C	1	605	6	14674	0.0227935	0.0536081	4.04242	CL60568Contig1
GO:0032801	receptor catabolic process	P	1	605	6	14674	0.0227935	0.0536081	4.04242	CL54447Contig1
GO:0032927	positive regulation of activin receptor signaling pathway	P	1	605	6	14674	0.0227935	0.0536081	4.04242	comp99963_c0_seq3
GO:0033198	response to ATP	P	1	605	6	14674	0.0227935	0.0536081	4.04242	CL33624Contig1
GO:0033234	negative regulation of protein sumoylation	P	1	605	6	14674	0.0227935	0.0536081	4.04242	CL67774Contig1
GO:0035005	1-phosphatidylinositol-4-phosphate 3-kinase activity	F	1	605	6	14674	0.0227935	0.0536081	4.04242	CL55052Contig1
GO:0035143	caudal fin morphogenesis	P	1	605	6	14674	0.0227935	0.0536081	4.04242	CL75180Contig1
GO:0035255	ionotropic glutamate receptor binding	F	1	605	6	14674	0.0227935	0.0536081	4.04242	CL13523Contig1
GO:0035313	wound healing, spreading of epidermal cells	P	1	605	6	14674	0.0227935	0.0536081	4.04242	CL56191Contig1
GO:0036035	osteoclast development	P	1	605	6	14674	0.0227935	0.0536081	4.04242	CL44463Contig1
GO:0042326	negative regulation of phosphorylation	P	1	605	6	14674	0.0227935	0.0536081	4.04242	CL327Contig1
GO:0042420	dopamine catabolic process	P	1	605	6	14674	0.0227935	0.0536081	4.04242	CL71697Contig1
GO:0043122	regulation of I-kappaB kinase/NF-kappaB signaling	P	1	605	6	14674	0.0227935	0.0536081	4.04242	CL67774Contig1
GO:0044224	juxtaparanode region of axon	C	1	605	6	14674	0.0227935	0.0536081	4.04242	CL55248Contig1
GO:0045298	tubulin complex	C	1	605	6	14674	0.0227935	0.0536081	4.04242	CL69045Contig1
GO:0046934	phosphatidylinositol-4,5-bisphosphate 3-kinase activity	F	1	605	6	14674	0.0227935	0.0536081	4.04242	CL55052Contig1
GO:0048149	behavioral response to ethanol	P	1	605	6	14674	0.0227935	0.0536081	4.04242	CL71697Contig1
GO:0050508	glucuronosyl-N-acetylglucosaminyl-proteoglycan 4-alpha-N-acetylglucosaminyltransferase activity	F	1	605	6	14674	0.0227935	0.0536081	4.04242	CL15376Contig1
GO:0050936	xanthophore differentiation	P	1	605	6	14674	0.0227935	0.0536081	4.04242	CL44463Contig1
GO:0051393	alpha-actinin binding	F	1	605	6	14674	0.0227935	0.0536081	4.04242	CL13662Contig1
GO:0060831	smoothened signaling pathway involved in dorsal/ventral neural tube patterning	P	1	605	6	14674	0.0227935	0.0536081	4.04242	CL53372Contig1
GO:0061299	retina vasculature morphogenesis in camera-type eye	P	1	605	6	14674	0.0227935	0.0536081	4.04242	CL67747Contig1
GO:0070166	enamel mineralization	P	1	605	6	14674	0.0227935	0.0536081	4.04242	CL5149Contig1
GO:0070493	thrombin receptor signaling pathway	P	1	605	6	14674	0.0227935	0.0536081	4.04242	CL2689Contig1
GO:0070654	sensory epithelium regeneration	P	1	605	6	14674	0.0227935	0.0536081	4.04242	CL56191Contig1
GO:0071392	cellular response to estradiol stimulus	P	1	605	6	14674	0.0227935	0.0536081	4.04242	CL52970Contig1
GO:0071949	FAD binding	F	1	605	6	14674	0.0227935	0.0536081	4.04242	CL3289Contig1
GO:0072498	embryonic skeletal joint development	P	1	605	6	14674	0.0227935	0.0536081	4.04242	CL15376Contig1
GO:0090024	negative regulation of neutrophil chemotaxis	P	1	605	6	14674	0.0227935	0.0536081	4.04242	CL55941Contig1
GO:2000271	positive regulation of fibroblast apoptotic process	P	1	605	6	14674	0.0227935	0.0536081	4.04242	CL52970Contig1
GO:2000969	positive regulation of alpha-amino-3-hydroxy-5-methyl-4-isoxazole propionate selective glutamate receptor activity	P	1	605	6	14674	0.0227935	0.0536081	4.04242	CL13523Contig1
GO:0000226	microtubule cytoskeleton organization	P	4	605	40	14674	0.0234235	0.0550093	2.42545	CL3868Contig1;CL841Contig1;CL26834Contig1;CL44822Contig1
GO:0007186	G-protein coupled receptor signaling pathway	P	17	605	263	14674	0.024746	0.0580301	1.56778	comp42969_c0_seq1;CL56578Contig1;CL13483Contig1;CL3908Contig1;CL53494Contig1;CL4157Contig1;CL54756Contig1;CL33750Contig1;CL55941Contig1;CL43506Contig1;CL31250Contig1;CL56559Contig1;CL34343Contig1;CL59086Contig1;CL670Contig1;CL58279Contig1;CL18310Contig1
GO:0031012	extracellular matrix	C	6	605	70	14674	0.0248895	0.0582814	2.07896	CL13846Contig1;CL16071Contig1;CL9169Contig1;CL13429Contig1;CL55132Contig1;CL1038Contig1
GO:0009986	cell surface	C	10	605	136	14674	0.0250352	0.0585372	1.78342	CL20341Contig1;CL47336Contig1;comp99963_c0_seq3;CL55248Contig1;CL41294Contig1;CL52970Contig1;CL57605Contig1;CL16373Contig1;CL56191Contig1;CL18310Contig1
GO:0014823	response to activity	P	2	605	16	14674	0.0261541	0.0610642	3.03182	CL4969Contig1;CL51036Contig1
GO:0005615	extracellular space	C	18	605	284	14674	0.0264043	0.0615588	1.53726	CL57952Contig1;CL5783Contig1;CL43249Contig1;CL20341Contig1;CL47336Contig1;CL9169Contig1;CL57172Contig1;CL55089Contig1;CL52638Contig1;CL52510Contig1;CL52970Contig1;CL57605Contig1;CL13429Contig1;CL16373Contig1;CL35772Contig1;CL55827Contig1;CL38822Contig1;CL56191Contig1
GO:0006605	protein targeting	P	3	605	28	14674	0.0266934	0.0618732	2.5987	comp70295_c0_seq1;comp70300_c0_seq1;CL51794Contig1
GO:0042060	wound healing	P	3	605	28	14674	0.0266934	0.0618732	2.5987	CL10939Contig1;CL73978Contig1;CL51361Contig1
GO:0071391	cellular response to estrogen stimulus	P	3	605	28	14674	0.0266934	0.0618732	2.5987	CL51548Contig1;CL58053Contig1;CL14199Contig1
GO:0071466	cellular response to xenobiotic stimulus	P	3	605	28	14674	0.0266934	0.0618732	2.5987	CL57904Contig1;CL58052Contig1;CL58446Contig1
GO:0030170	pyridoxal phosphate binding	F	5	605	56	14674	0.0271535	0.0628487	2.16558	CL13143Contig1;CL33878Contig1;CL51474Contig1;CL1895Contig1;CL14199Contig1
GO:0005871	kinesin complex	C	5	605	57	14674	0.0293303	0.0670286	2.12759	comp70295_c0_seq1;comp70300_c0_seq1;CL108Contig1;comp112602_c0_seq7;CL68159Contig1
GO:0016791	phosphatase activity	F	2	605	17	14674	0.0308085	0.0670286	2.85348	CL16855Contig1;CL5365Contig1
GO:0019752	carboxylic acid metabolic process	P	2	605	17	14674	0.0308085	0.0670286	2.85348	CL13143Contig1;CL33878Contig1
GO:0021952	central nervous system projection neuron axonogenesis	P	2	605	17	14674	0.0308085	0.0670286	2.85348	CL15504Contig1;CL15924Contig1
GO:0031018	endocrine pancreas development	P	2	605	17	14674	0.0308085	0.0670286	2.85348	CL53372Contig1;CL57605Contig1
GO:0046686	response to cadmium ion	P	2	605	17	14674	0.0308085	0.0670286	2.85348	CL73519Contig1;CL56728Contig1
GO:1900740	positive regulation of protein insertion into mitochondrial membrane involved in apoptotic signaling pathway	P	2	605	17	14674	0.0308085	0.0670286	2.85348	comp70295_c0_seq1;comp70300_c0_seq1
GO:0001779	natural killer cell differentiation	P	1	605	7	14674	0.0310488	0.0670286	3.46494	CL55089Contig1
GO:0002199	zona pellucida receptor complex	C	1	605	7	14674	0.0310488	0.0670286	3.46494	CL13592Contig1
GO:0002230	positive regulation of defense response to virus by host	P	1	605	7	14674	0.0310488	0.0670286	3.46494	CL66Contig1
GO:0004525	ribonuclease III activity	F	1	605	7	14674	0.0310488	0.0670286	3.46494	CL54131Contig1
GO:0004692	cGMP-dependent protein kinase activity	F	1	605	7	14674	0.0310488	0.0670286	3.46494	CL842Contig1
GO:0005832	chaperonin-containing T-complex	C	1	605	7	14674	0.0310488	0.0670286	3.46494	CL13592Contig1
GO:0006144	purine nucleobase metabolic process	P	1	605	7	14674	0.0310488	0.0670286	3.46494	CL51818Contig1
GO:0006584	catecholamine metabolic process	P	1	605	7	14674	0.0310488	0.0670286	3.46494	CL55476Contig1
GO:0006835	dicarboxylic acid transport	P	1	605	7	14674	0.0310488	0.0670286	3.46494	CL54593Contig1
GO:0007602	phototransduction	P	1	605	7	14674	0.0310488	0.0670286	3.46494	CL3169Contig1
GO:0008585	female gonad development	P	1	605	7	14674	0.0310488	0.0670286	3.46494	CL52970Contig1
GO:0010719	negative regulation of epithelial to mesenchymal transition	P	1	605	7	14674	0.0310488	0.0670286	3.46494	CL52970Contig1
GO:0015095	magnesium ion transmembrane transporter activity	F	1	605	7	14674	0.0310488	0.0670286	3.46494	CL3482Contig1
GO:0016798	hydrolase activity, acting on glycosyl bonds	F	1	605	7	14674	0.0310488	0.0670286	3.46494	CL58053Contig1
GO:0016849	phosphorus-oxygen lyase activity	F	1	605	7	14674	0.0310488	0.0670286	3.46494	CL47996Contig1
GO:0019068	virion assembly	P	1	605	7	14674	0.0310488	0.0670286	3.46494	CL17768Contig1
GO:0030507	spectrin binding	F	1	605	7	14674	0.0310488	0.0670286	3.46494	CL74442Contig1
GO:0030705	cytoskeleton-dependent intracellular transport	P	1	605	7	14674	0.0310488	0.0670286	3.46494	CL69045Contig1
GO:0031994	insulin-like growth factor I binding	F	1	605	7	14674	0.0310488	0.0670286	3.46494	CL52253Contig1
GO:0032757	positive regulation of interleukin-8 production	P	1	605	7	14674	0.0310488	0.0670286	3.46494	CL16373Contig1
GO:0032981	mitochondrial respiratory chain complex I assembly	P	1	605	7	14674	0.0310488	0.0670286	3.46494	CL14489Contig1
GO:0042267	natural killer cell mediated cytotoxicity	P	1	605	7	14674	0.0310488	0.0670286	3.46494	CL69045Contig1
GO:0042759	long-chain fatty acid biosynthetic process	P	1	605	7	14674	0.0310488	0.0670286	3.46494	CL22615Contig1
GO:0043087	regulation of GTPase activity	P	1	605	7	14674	0.0310488	0.0670286	3.46494	CL842Contig1
GO:0043194	axon initial segment	C	1	605	7	14674	0.0310488	0.0670286	3.46494	CL9484Contig1
GO:0045059	positive thymic T cell selection	P	1	605	7	14674	0.0310488	0.0670286	3.46494	comp66281_c0_seq1
GO:0045060	negative thymic T cell selection	P	1	605	7	14674	0.0310488	0.0670286	3.46494	comp66281_c0_seq1
GO:0045739	positive regulation of DNA repair	P	1	605	7	14674	0.0310488	0.0670286	3.46494	CL18595Contig1
GO:0048332	mesoderm morphogenesis	P	1	605	7	14674	0.0310488	0.0670286	3.46494	CL39499Contig1
GO:0048739	cardiac muscle fiber development	P	1	605	7	14674	0.0310488	0.0670286	3.46494	comp62502_c0_seq1
GO:0048769	sarcomerogenesis	P	1	605	7	14674	0.0310488	0.0670286	3.46494	CL57294Contig1
GO:0048855	adenohypophysis morphogenesis	P	1	605	7	14674	0.0310488	0.0670286	3.46494	CL53372Contig1
GO:0050509	N-acetylglucosaminyl-proteoglycan 4-beta-glucuronosyltransferase activity	F	1	605	7	14674	0.0310488	0.0670286	3.46494	CL15376Contig1
GO:0050930	induction of positive chemotaxis	P	1	605	7	14674	0.0310488	0.0670286	3.46494	CL55941Contig1
GO:0051653	spindle localization	P	1	605	7	14674	0.0310488	0.0670286	3.46494	CL38931Contig1
GO:0055002	striated muscle cell development	P	1	605	7	14674	0.0310488	0.0670286	3.46494	CL53372Contig1
GO:0060173	limb development	P	1	605	7	14674	0.0310488	0.0670286	3.46494	CL13429Contig1
GO:0060997	dendritic spine morphogenesis	P	1	605	7	14674	0.0310488	0.0670286	3.46494	CL13523Contig1
GO:0070402	NADPH binding	F	1	605	7	14674	0.0310488	0.0670286	3.46494	CL54823Contig1
GO:0071371	cellular response to gonadotropin stimulus	P	1	605	7	14674	0.0310488	0.0670286	3.46494	CL50111Contig1
GO:0071564	npBAF complex	C	1	605	7	14674	0.0310488	0.0670286	3.46494	CL34434Contig1
GO:0071565	nBAF complex	C	1	605	7	14674	0.0310488	0.0670286	3.46494	CL34434Contig1
GO:0097114	N-methyl-D-aspartate receptor clustering	P	1	605	7	14674	0.0310488	0.0670286	3.46494	CL13523Contig1
GO:0042391	regulation of membrane potential	P	5	605	58	14674	0.0316187	0.0681671	2.09091	CL68962Contig1;CL55688Contig1;CL33624Contig1;CL5006Contig1;CL56933Contig1
GO:0004197	cysteine-type endopeptidase activity	F	3	605	30	14674	0.0335069	0.071948	2.42545	CL54720Contig1;CL14095Contig1;CL52970Contig1
GO:0004497	monooxygenase activity	F	3	605	30	14674	0.0335069	0.071948	2.42545	comp70295_c0_seq1;comp70300_c0_seq1;CL2971Contig1
GO:0051289	protein homotetramerization	P	3	605	30	14674	0.0335069	0.071948	2.42545	CL68962Contig1;CL39382Contig1;CL56933Contig1
GO:0070062	extracellular vesicular exosome	C	5	605	59	14674	0.0340203	0.0729526	2.05547	CL69045Contig1;comp70295_c0_seq1;comp70300_c0_seq1;CL14671Contig1;CL38822Contig1
GO:0005544	calcium-dependent phospholipid binding	F	2	605	18	14674	0.0358669	0.0765033	2.69495	CL68720Contig1;CL13776Contig1
GO:0006370	7-methylguanosine mRNA capping	P	2	605	18	14674	0.0358669	0.0765033	2.69495	CL53834Contig1;CL56663Contig1
GO:0048146	positive regulation of fibroblast proliferation	P	2	605	18	14674	0.0358669	0.0765033	2.69495	CL20341Contig1;CL47336Contig1
GO:0071320	cellular response to cAMP	P	2	605	18	14674	0.0358669	0.0765033	2.69495	CL74442Contig1;CL50111Contig1
GO:0030900	forebrain development	P	4	605	45	14674	0.0368293	0.0784517	2.15596	CL842Contig1;CL15924Contig1;CL55941Contig1;CL51682Contig1
GO:0042593	glucose homeostasis	P	3	605	31	14674	0.037259	0.0792618	2.34721	CL16373Contig1;CL71697Contig1;CL287Contig1
GO:0000086	G2/M transition of mitotic cell cycle	P	4	605	46	14674	0.0399744	0.0810734	2.10909	CL69045Contig1;comp70295_c0_seq1;comp70300_c0_seq1;CL44822Contig1
GO:0000722	telomere maintenance via recombination	P	1	605	8	14674	0.040284	0.0810734	3.03182	CL53930Contig1
GO:0001508	action potential	P	1	605	8	14674	0.040284	0.0810734	3.03182	CL51524Contig1
GO:0001816	cytokine production	P	1	605	8	14674	0.040284	0.0810734	3.03182	CL71697Contig1
GO:0002218	activation of innate immune response	P	1	605	8	14674	0.040284	0.0810734	3.03182	CL66Contig1
GO:0003094	glomerular filtration	P	1	605	8	14674	0.040284	0.0810734	3.03182	CL7671Contig1
GO:0003993	acid phosphatase activity	F	1	605	8	14674	0.040284	0.0810734	3.03182	CL49811Contig1
GO:0004568	chitinase activity	F	1	605	8	14674	0.040284	0.0810734	3.03182	CL55754Contig1
GO:0004957	prostaglandin E receptor activity	F	1	605	8	14674	0.040284	0.0810734	3.03182	CL58918Contig1
GO:0005344	oxygen transporter activity	F	1	605	8	14674	0.040284	0.0810734	3.03182	CL4969Contig1
GO:0006032	chitin catabolic process	P	1	605	8	14674	0.040284	0.0810734	3.03182	CL55754Contig1
GO:0008091	spectrin	C	1	605	8	14674	0.040284	0.0810734	3.03182	CL14086Contig1
GO:0008154	actin polymerization or depolymerization	P	1	605	8	14674	0.040284	0.0810734	3.03182	CL39382Contig1
GO:0008299	isoprenoid biosynthetic process	P	1	605	8	14674	0.040284	0.0810734	3.03182	CL54823Contig1
GO:0008589	regulation of smoothened signaling pathway	P	1	605	8	14674	0.040284	0.0810734	3.03182	CL53372Contig1
GO:0015014	heparan sulfate proteoglycan biosynthetic process, polysaccharide chain biosynthetic process	P	1	605	8	14674	0.040284	0.0810734	3.03182	CL15376Contig1
GO:0015671	oxygen transport	P	1	605	8	14674	0.040284	0.0810734	3.03182	CL4969Contig1
GO:0016709	oxidoreductase activity, acting on paired donors, with incorporation or reduction of molecular oxygen, NAD(P)H as one donor, and incorporation of one atom of oxygen	F	1	605	8	14674	0.040284	0.0810734	3.03182	CL3289Contig1
GO:0017002	activin-activated receptor activity	F	1	605	8	14674	0.040284	0.0810734	3.03182	comp99963_c0_seq3
GO:0022891	substrate-specific transmembrane transporter activity	F	1	605	8	14674	0.040284	0.0810734	3.03182	CL40036Contig1
GO:0030042	actin filament depolymerization	P	1	605	8	14674	0.040284	0.0810734	3.03182	CL3289Contig1
GO:0031054	pre-miRNA processing	P	1	605	8	14674	0.040284	0.0810734	3.03182	CL54131Contig1
GO:0031512	motile primary cilium	C	1	605	8	14674	0.040284	0.0810734	3.03182	CL53372Contig1
GO:0033268	node of Ranvier	C	1	605	8	14674	0.040284	0.0810734	3.03182	CL9484Contig1
GO:0033630	positive regulation of cell adhesion mediated by integrin	P	1	605	8	14674	0.040284	0.0810734	3.03182	CL2033Contig1
GO:0034629	cellular protein complex localization	P	1	605	8	14674	0.040284	0.0810734	3.03182	CL38931Contig1
GO:0034660	ncRNA metabolic process	P	1	605	8	14674	0.040284	0.0810734	3.03182	CL50686Contig1
GO:0035518	histone H2A monoubiquitination	P	1	605	8	14674	0.040284	0.0810734	3.03182	CL18595Contig1
GO:0035641	locomotory exploration behavior	P	1	605	8	14674	0.040284	0.0810734	3.03182	CL13523Contig1
GO:0035861	site of double-strand break	C	1	605	8	14674	0.040284	0.0810734	3.03182	CL18595Contig1
GO:0042277	peptide binding	F	1	605	8	14674	0.040284	0.0810734	3.03182	CL59086Contig1
GO:0042325	regulation of phosphorylation	P	1	605	8	14674	0.040284	0.0810734	3.03182	CL52571Contig1
GO:0043508	negative regulation of JUN kinase activity	P	1	605	8	14674	0.040284	0.0810734	3.03182	CL52970Contig1
GO:0044344	cellular response to fibroblast growth factor stimulus	P	1	605	8	14674	0.040284	0.0810734	3.03182	CL52970Contig1
GO:0046914	transition metal ion binding	F	1	605	8	14674	0.040284	0.0810734	3.03182	CL55064Contig1
GO:0048185	activin binding	F	1	605	8	14674	0.040284	0.0810734	3.03182	comp99963_c0_seq3
GO:0048662	negative regulation of smooth muscle cell proliferation	P	1	605	8	14674	0.040284	0.0810734	3.03182	CL16373Contig1
GO:0050868	negative regulation of T cell activation	P	1	605	8	14674	0.040284	0.0810734	3.03182	CL13993Contig1
GO:0051149	positive regulation of muscle cell differentiation	P	1	605	8	14674	0.040284	0.0810734	3.03182	CL1267Contig1
GO:0060076	excitatory synapse	C	1	605	8	14674	0.040284	0.0810734	3.03182	CL13523Contig1
GO:0061053	somite development	P	1	605	8	14674	0.040284	0.0810734	3.03182	CL57605Contig1
GO:0071347	cellular response to interleukin-1	P	1	605	8	14674	0.040284	0.0810734	3.03182	CL52970Contig1
GO:2000311	regulation of alpha-amino-3-hydroxy-5-methyl-4-isoxazole propionate selective glutamate receptor activity	P	1	605	8	14674	0.040284	0.0810734	3.03182	CL55688Contig1
GO:0000981	sequence-specific DNA binding RNA polymerase II transcription factor activity	F	3	605	32	14674	0.0412425	0.0822375	2.27386	CL54999Contig1;comp94537_c0_seq6;CL51327Contig1
GO:0006006	glucose metabolic process	P	3	605	32	14674	0.0412425	0.0822375	2.27386	CL53724Contig1;CL33624Contig1;CL16373Contig1
GO:0008016	regulation of heart contraction	P	3	605	32	14674	0.0412425	0.0822375	2.27386	CL49004Contig1;comp97737_c0_seq1;CL56191Contig1
GO:0001518	voltage-gated sodium channel complex	C	2	605	19	14674	0.0413238	0.0822375	2.55311	CL15665Contig1;CL49004Contig1
GO:0005254	chloride channel activity	F	2	605	19	14674	0.0413238	0.0822375	2.55311	CL54593Contig1;CL37666Contig1
GO:0005913	cell-cell adherens junction	C	2	605	19	14674	0.0413238	0.0822375	2.55311	CL1267Contig1;CL5149Contig1
GO:0008344	adult locomotory behavior	P	2	605	19	14674	0.0413238	0.0822375	2.55311	CL1102Contig1;CL56296Contig1
GO:0035329	hippo signaling	P	2	605	19	14674	0.0413238	0.0822375	2.55311	comp70295_c0_seq1;comp70300_c0_seq1
GO:0052689	carboxylic ester hydrolase activity	F	2	605	19	14674	0.0413238	0.0822375	2.55311	CL47151Contig1;CL71432Contig1
GO:0007626	locomotory behavior	P	6	605	78	14674	0.0415662	0.0826173	1.86573	CL51524Contig1;CL17264Contig1;CL51349Contig1;CL43506Contig1;CL71697Contig1;CL49087Contig1
GO:0005525	GTP binding	F	25	605	440	14674	0.0419984	0.083373	1.3781	CL69045Contig1;CL51818Contig1;CL29866Contig1;CL44305Contig1;CL56196Contig1;CL57763Contig1;CL14542Contig1;CL13494Contig1;CL49773Contig1;CL53834Contig1;CL63395Contig1;CL11091Contig1;CL22031Contig1;CL16242Contig1;CL52641Contig1;CL24273Contig1;CL56663Contig1;CL327Contig1;CL16379Contig1;CL66Contig1;CL15028Contig1;CL59976Contig1;CL1862Contig1;CL10260Contig1;CL72452Contig1
GO:0006629	lipid metabolic process	P	5	605	63	14674	0.0447884	0.0886921	1.92496	CL42675Contig1;CL15504Contig1;CL11851Contig1;CL52281Contig1;CL57509Contig1
GO:0031101	fin regeneration	P	5	605	63	14674	0.0447884	0.0886921	1.92496	CL54720Contig1;CL15204Contig1;CL55941Contig1;CL57605Contig1;CL52865Contig1
GO:0006936	muscle contraction	P	3	605	33	14674	0.0454577	0.0899065	2.20496	CL18996Contig1;CL68962Contig1;CL56933Contig1
GO:0005778	peroxisomal membrane	C	2	605	20	14674	0.0471722	0.0927258	2.42545	CL56067Contig1;CL54823Contig1
GO:0008536	Ran GTPase binding	F	2	605	20	14674	0.0471722	0.0927258	2.42545	CL4879Contig1;CL53512Contig1
GO:0016831	carboxy-lyase activity	F	2	605	20	14674	0.0471722	0.0927258	2.42545	CL13143Contig1;CL33878Contig1
GO:0071456	cellular response to hypoxia	P	2	605	20	14674	0.0471722	0.0927258	2.42545	CL59308Contig1;CL52970Contig1
GO:0072659	protein localization to plasma membrane	P	2	605	20	14674	0.0471722	0.0927258	2.42545	CL15665Contig1;CL16373Contig1
GO:0008201	heparin binding	F	5	605	64	14674	0.0477768	0.0936845	1.89489	CL75180Contig1;CL52970Contig1;CL13429Contig1;CL55064Contig1;CL56191Contig1
GO:0051082	unfolded protein binding	F	5	605	64	14674	0.0477768	0.0936845	1.89489	CL73602Contig1;CL13592Contig1;CL52723Contig1;CL51618Contig1;CL44770Contig1
GO:0005884	actin filament	C	3	605	34	14674	0.0499041	0.0947819	2.14011	CL53028Contig1;CL74442Contig1;CL55088Contig1
GO:0032869	cellular response to insulin stimulus	P	3	605	34	14674	0.0499041	0.0947819	2.14011	CL20341Contig1;CL47336Contig1;CL16373Contig1
GO:0000281	mitotic cytokinesis	P	1	605	9	14674	0.0504046	0.0947819	2.69495	CL14095Contig1
GO:0004602	glutathione peroxidase activity	F	1	605	9	14674	0.0504046	0.0947819	2.69495	CL57692Contig1
GO:0005154	epidermal growth factor receptor binding	F	1	605	9	14674	0.0504046	0.0947819	2.69495	CL56191Contig1
GO:0005160	transforming growth factor beta receptor binding	F	1	605	9	14674	0.0504046	0.0947819	2.69495	CL57172Contig1
GO:0006337	nucleosome disassembly	P	1	605	9	14674	0.0504046	0.0947819	2.69495	CL34434Contig1
GO:0006987	activation of signaling protein activity involved in unfolded protein response	P	1	605	9	14674	0.0504046	0.0947819	2.69495	CL54204Contig1
GO:0007193	adenylate cyclase-inhibiting G-protein coupled receptor signaling pathway	P	1	605	9	14674	0.0504046	0.0947819	2.69495	CL287Contig1
GO:0008061	chitin binding	F	1	605	9	14674	0.0504046	0.0947819	2.69495	CL55754Contig1
GO:0008331	high voltage-gated calcium channel activity	F	1	605	9	14674	0.0504046	0.0947819	2.69495	CL18996Contig1
GO:0008440	inositol-1,4,5-trisphosphate 3-kinase activity	F	1	605	9	14674	0.0504046	0.0947819	2.69495	CL38797Contig1
GO:0009117	nucleotide metabolic process	P	1	605	9	14674	0.0504046	0.0947819	2.69495	CL3172Contig1
GO:0016514	SWI/SNF complex	C	1	605	9	14674	0.0504046	0.0947819	2.69495	CL34434Contig1
GO:0016712	oxidoreductase activity, acting on paired donors, with incorporation or reduction of molecular oxygen, reduced flavin or flavoprotein as one donor, and incorporation of one atom of oxygen	F	1	605	9	14674	0.0504046	0.0947819	2.69495	CL52073Contig1
GO:0017153	sodium:dicarboxylate symporter activity	F	1	605	9	14674	0.0504046	0.0947819	2.69495	CL54593Contig1
GO:0019897	extrinsic component of plasma membrane	C	1	605	9	14674	0.0504046	0.0947819	2.69495	CL14095Contig1
GO:0021696	cerebellar cortex morphogenesis	P	1	605	9	14674	0.0504046	0.0947819	2.69495	CL53372Contig1
GO:0030914	STAGA complex	C	1	605	9	14674	0.0504046	0.0947819	2.69495	CL31700Contig1
GO:0032331	negative regulation of chondrocyte differentiation	P	1	605	9	14674	0.0504046	0.0947819	2.69495	CL53372Contig1
GO:0032474	otolith morphogenesis	P	1	605	9	14674	0.0504046	0.0947819	2.69495	CL52638Contig1
GO:0033689	negative regulation of osteoblast proliferation	P	1	605	9	14674	0.0504046	0.0947819	2.69495	CL52970Contig1
GO:0035102	PRC1 complex	C	1	605	9	14674	0.0504046	0.0947819	2.69495	CL13634Contig1
GO:0042694	muscle cell fate specification	P	1	605	9	14674	0.0504046	0.0947819	2.69495	CL53372Contig1
GO:0042711	maternal behavior	P	1	605	9	14674	0.0504046	0.0947819	2.69495	CL71697Contig1
GO:0045190	isotype switching	P	1	605	9	14674	0.0504046	0.0947819	2.69495	CL18595Contig1
GO:0046326	positive regulation of glucose import	P	1	605	9	14674	0.0504046	0.0947819	2.69495	CL16373Contig1
GO:0050714	positive regulation of protein secretion	P	1	605	9	14674	0.0504046	0.0947819	2.69495	CL20341Contig1
GO:0060285	cilium-dependent cell motility	P	1	605	9	14674	0.0504046	0.0947819	2.69495	CL25719Contig1
GO:0060346	bone trabecula formation	P	1	605	9	14674	0.0504046	0.0947819	2.69495	CL52970Contig1
GO:0070286	axonemal dynein complex assembly	P	1	605	9	14674	0.0504046	0.0947819	2.69495	CL25719Contig1
GO:0070403	NAD+ binding	F	1	605	9	14674	0.0504046	0.0947819	2.69495	CL58918Contig1
GO:0070469	respiratory chain	C	1	605	9	14674	0.0504046	0.0947819	2.69495	CL15830Contig1
GO:0090331	negative regulation of platelet aggregation	P	1	605	9	14674	0.0504046	0.0947819	2.69495	CL842Contig1
GO:2000223	regulation of BMP signaling pathway involved in heart jogging	P	1	605	9	14674	0.0504046	0.0947819	2.69495	CL75180Contig1
GO:0001539	cilium or flagellum-dependent cell motility	P	2	605	21	14674	0.0534035	0.0998358	2.30996	CL68252Contig1;comp12586_c0_seq1
GO:0007613	memory	P	2	605	21	14674	0.0534035	0.0998358	2.30996	CL13523Contig1;CL71697Contig1
GO:0008137	NADH dehydrogenase (ubiquinone) activity	F	2	605	21	14674	0.0534035	0.0998358	2.30996	CL30491Contig1;CL15830Contig1
GO:0035249	synaptic transmission, glutamatergic	P	2	605	21	14674	0.0534035	0.0998358	2.30996	CL1102Contig1;CL55688Contig1
GO:0060218	hematopoietic stem cell differentiation	P	2	605	21	14674	0.0534035	0.0998358	2.30996	CL2517Contig1;CL52970Contig1
GO:0003676	nucleic acid binding	F	31	605	581	14674	0.0586067	0.109436	1.29413	CL15015Contig1;CL45937Contig1;CL8209Contig1;CL14501Contig1;CL67300Contig1;CL1798Contig1;comp112051_c2_seq4;CL15504Contig1;CL52332Contig1;CL53834Contig1;CL4659Contig1;CL35357Contig1;CL1958Contig1;CL45430Contig1;CL18361Contig1;comp94537_c0_seq6;CL54389Contig1;CL72349Contig1;CL542Contig1;comp99632_c0_seq3;CL51567Contig1;CL53773Contig1;CL5971Contig1;CL74680Contig1;CL14587Contig1;CL11745Contig1;CL5288…
GO:0005044	scavenger receptor activity	F	3	605	36	14674	0.0594855	0.109655	2.02121	CL52163Contig1;CL2166Contig1;CL69870Contig1
GO:0006814	sodium ion transport	P	3	605	36	14674	0.0594855	0.109655	2.02121	CL46776Contig1;CL40433Contig1;CL45141Contig1
GO:0043621	protein self-association	F	3	605	36	14674	0.0594855	0.109655	2.02121	comp99963_c0_seq3;CL13523Contig1;CL74442Contig1
GO:0001948	glycoprotein binding	F	2	605	22	14674	0.0600077	0.109655	2.20496	CL53574Contig1;CL19349Contig1
GO:0001974	blood vessel remodeling	P	2	605	22	14674	0.0600077	0.109655	2.20496	CL5783Contig1;CL71697Contig1
GO:0005262	calcium channel activity	F	2	605	22	14674	0.0600077	0.109655	2.20496	CL52094Contig1;CL68808Contig1
GO:0048514	blood vessel morphogenesis	P	2	605	22	14674	0.0600077	0.109655	2.20496	CL2033Contig1;CL14671Contig1
GO:0001741	XY body	C	1	605	10	14674	0.0613221	0.109655	2.42545	CL34434Contig1
GO:0001750	photoreceptor outer segment	C	1	605	10	14674	0.0613221	0.109655	2.42545	CL3169Contig1
GO:0005246	calcium channel regulator activity	F	1	605	10	14674	0.0613221	0.109655	2.42545	CL842Contig1
GO:0005980	glycogen catabolic process	P	1	605	10	14674	0.0613221	0.109655	2.42545	CL53724Contig1
GO:0007223	Wnt signaling pathway, calcium modulating pathway	P	1	605	10	14674	0.0613221	0.109655	2.42545	CL57605Contig1
GO:0008047	enzyme activator activity	F	1	605	10	14674	0.0613221	0.109655	2.42545	CL46988Contig1
GO:0008271	secondary active sulfate transmembrane transporter activity	F	1	605	10	14674	0.0613221	0.109655	2.42545	CL55371Contig1
GO:0010460	positive regulation of heart rate	P	1	605	10	14674	0.0613221	0.109655	2.42545	CL15665Contig1
GO:0010765	positive regulation of sodium ion transport	P	1	605	10	14674	0.0613221	0.109655	2.42545	CL15665Contig1
GO:0015693	magnesium ion transport	P	1	605	10	14674	0.0613221	0.109655	2.42545	CL3482Contig1
GO:0016303	1-phosphatidylinositol-3-kinase activity	F	1	605	10	14674	0.0613221	0.109655	2.42545	CL55052Contig1
GO:0016706	oxidoreductase activity, acting on paired donors, with incorporation or reduction of molecular oxygen, 2-oxoglutarate as one donor, and incorporation of one atom each of oxygen into both donors	F	1	605	10	14674	0.0613221	0.109655	2.42545	CL45081Contig1
GO:0019825	oxygen binding	F	1	605	10	14674	0.0613221	0.109655	2.42545	CL4969Contig1
GO:0030532	small nuclear ribonucleoprotein complex	C	1	605	10	14674	0.0613221	0.109655	2.42545	CL50686Contig1
GO:0033333	fin development	P	1	605	10	14674	0.0613221	0.109655	2.42545	CL53699Contig1
GO:0042157	lipoprotein metabolic process	P	1	605	10	14674	0.0613221	0.109655	2.42545	CL15735Contig1
GO:0043200	response to amino acid	P	1	605	10	14674	0.0613221	0.109655	2.42545	CL18310Contig1
GO:0045198	establishment of epithelial cell apical/basal polarity	P	1	605	10	14674	0.0613221	0.109655	2.42545	CL53332Contig1
GO:0045445	myoblast differentiation	P	1	605	10	14674	0.0613221	0.109655	2.42545	CL3483Contig1
GO:0045545	syndecan binding	F	1	605	10	14674	0.0613221	0.109655	2.42545	CL75180Contig1
GO:0048037	cofactor binding	F	1	605	10	14674	0.0613221	0.109655	2.42545	CL44822Contig1
GO:0050767	regulation of neurogenesis	P	1	605	10	14674	0.0613221	0.109655	2.42545	CL44781Contig1
GO:0051489	regulation of filopodium assembly	P	1	605	10	14674	0.0613221	0.109655	2.42545	CL74442Contig1
GO:0051968	positive regulation of synaptic transmission, glutamatergic	P	1	605	10	14674	0.0613221	0.109655	2.42545	CL13523Contig1
GO:0060322	head development	P	1	605	10	14674	0.0613221	0.109655	2.42545	CL53372Contig1
GO:0060766	negative regulation of androgen receptor signaling pathway	P	1	605	10	14674	0.0613221	0.109655	2.42545	CL52970Contig1
GO:0060993	kidney morphogenesis	P	1	605	10	14674	0.0613221	0.109655	2.42545	CL52119Contig1
GO:0061001	regulation of dendritic spine morphogenesis	P	1	605	10	14674	0.0613221	0.109655	2.42545	CL13523Contig1
GO:0070536	protein K63-linked deubiquitination	P	1	605	10	14674	0.0613221	0.109655	2.42545	CL14095Contig1
GO:0070935	3'-UTR-mediated mRNA stabilization	P	1	605	10	14674	0.0613221	0.109655	2.42545	CL53372Contig1
GO:2001237	negative regulation of extrinsic apoptotic signaling pathway	P	1	605	10	14674	0.0613221	0.109655	2.42545	CL2400Contig1
GO:0008307	structural constituent of muscle	F	2	605	23	14674	0.0669739	0.119495	2.10909	CL67774Contig1;CL47996Contig1
GO:0048666	neuron development	P	2	605	23	14674	0.0669739	0.119495	2.10909	CL51349Contig1;CL14945Contig1
GO:0006486	protein glycosylation	P	5	605	70	14674	0.0682506	0.121638	1.73247	CL49344Contig1;CL52119Contig1;CL1520Contig1;CL15376Contig1;CL60989Contig1
GO:0060047	heart contraction	P	3	605	38	14674	0.0699712	0.124566	1.91483	CL47996Contig1;CL56191Contig1;CL52865Contig1
GO:0003215	cardiac right ventricle morphogenesis	P	1	605	11	14674	0.0729538	0.125421	2.20496	CL5783Contig1
GO:0004702	receptor signaling protein serine/threonine kinase activity	F	1	605	11	14674	0.0729538	0.125421	2.20496	comp99963_c0_seq3
GO:0005041	low-density lipoprotein receptor activity	F	1	605	11	14674	0.0729538	0.125421	2.20496	CL1618Contig1
GO:0006289	nucleotide-excision repair	P	1	605	11	14674	0.0729538	0.125421	2.20496	CL57241Contig1
GO:0006309	apoptotic DNA fragmentation	P	1	605	11	14674	0.0729538	0.125421	2.20496	CL52970Contig1
GO:0006487	protein N-linked glycosylation	P	1	605	11	14674	0.0729538	0.125421	2.20496	CL14945Contig1
GO:0008354	germ cell migration	P	1	605	11	14674	0.0729538	0.125421	2.20496	CL55941Contig1
GO:0008643	carbohydrate transport	P	1	605	11	14674	0.0729538	0.125421	2.20496	CL40036Contig1
GO:0009651	response to salt stress	P	1	605	11	14674	0.0729538	0.125421	2.20496	CL55371Contig1
GO:0015464	acetylcholine receptor activity	F	1	605	11	14674	0.0729538	0.125421	2.20496	CL51524Contig1
GO:0016529	sarcoplasmic reticulum	C	1	605	11	14674	0.0729538	0.125421	2.20496	CL13429Contig1
GO:0016853	isomerase activity	F	1	605	11	14674	0.0729538	0.125421	2.20496	CL59308Contig1
GO:0030239	myofibril assembly	P	1	605	11	14674	0.0729538	0.125421	2.20496	CL55941Contig1
GO:0030673	axolemma	C	1	605	11	14674	0.0729538	0.125421	2.20496	CL55248Contig1
GO:0031513	nonmotile primary cilium	C	1	605	11	14674	0.0729538	0.125421	2.20496	CL53372Contig1
GO:0032588	trans-Golgi network membrane	C	1	605	11	14674	0.0729538	0.125421	2.20496	CL60568Contig1
GO:0032794	GTPase activating protein binding	F	1	605	11	14674	0.0729538	0.125421	2.20496	CL69045Contig1
GO:0034612	response to tumor necrosis factor	P	1	605	11	14674	0.0729538	0.125421	2.20496	CL16373Contig1
GO:0042288	MHC class I protein binding	F	1	605	11	14674	0.0729538	0.125421	2.20496	CL69045Contig1
GO:0043277	apoptotic cell clearance	P	1	605	11	14674	0.0729538	0.125421	2.20496	CL55089Contig1
GO:0043484	regulation of RNA splicing	P	1	605	11	14674	0.0729538	0.125421	2.20496	comp62502_c0_seq1
GO:0045671	negative regulation of osteoclast differentiation	P	1	605	11	14674	0.0729538	0.125421	2.20496	CL52970Contig1
GO:0048038	quinone binding	F	1	605	11	14674	0.0729538	0.125421	2.20496	CL69870Contig1
GO:0050730	regulation of peptidyl-tyrosine phosphorylation	P	1	605	11	14674	0.0729538	0.125421	2.20496	CL53574Contig1
GO:0051281	positive regulation of release of sequestered calcium ion into cytosol	P	1	605	11	14674	0.0729538	0.125421	2.20496	CL67774Contig1
GO:0051480	cytosolic calcium ion homeostasis	P	1	605	11	14674	0.0729538	0.125421	2.20496	CL14002Contig1
GO:0060080	regulation of inhibitory postsynaptic membrane potential	P	1	605	11	14674	0.0729538	0.125421	2.20496	CL17264Contig1
GO:0060134	prepulse inhibition	P	1	605	11	14674	0.0729538	0.125421	2.20496	CL1267Contig1
GO:0071108	protein K48-linked deubiquitination	P	1	605	11	14674	0.0729538	0.125421	2.20496	CL14095Contig1
GO:0090244	Wnt signaling pathway involved in somitogenesis	P	1	605	11	14674	0.0729538	0.125421	2.20496	CL52970Contig1
GO:0097194	execution phase of apoptosis	P	1	605	11	14674	0.0729538	0.125421	2.20496	CL59308Contig1
GO:2000463	positive regulation of excitatory postsynaptic membrane potential	P	1	605	11	14674	0.0729538	0.125421	2.20496	CL13523Contig1
GO:0005109	frizzled binding	F	2	605	24	14674	0.07429	0.127445	2.02121	CL52970Contig1;CL57605Contig1
GO:0097193	intrinsic apoptotic signaling pathway	P	2	605	24	14674	0.07429	0.127445	2.02121	comp70295_c0_seq1;comp70300_c0_seq1
GO:0006813	potassium ion transport	P	3	605	39	14674	0.075546	0.129461	1.86573	CL46776Contig1;CL40433Contig1;CL14560Contig1
GO:0007229	integrin-mediated signaling pathway	P	5	605	73	14674	0.0801296	0.137124	1.66127	CL2033Contig1;CL53574Contig1;CL52047Contig1;CL44875Contig1;CL9299Contig1
GO:0006310	DNA recombination	P	4	605	56	14674	0.0801884	0.137124	1.73247	comp112590_c1_seq4;CL15708Contig1;CL14738Contig1;CL17768Contig1
GO:0000786	nucleosome	C	3	605	40	14674	0.0813374	0.138793	1.81909	CL52165Contig1;CL4383Contig1;CL47996Contig1
GO:0006898	receptor-mediated endocytosis	P	3	605	40	14674	0.0813374	0.138793	1.81909	CL1618Contig1;CL2166Contig1;CL69870Contig1
GO:0004866	endopeptidase inhibitor activity	F	2	605	25	14674	0.0819432	0.139087	1.94036	CL57952Contig1;CL38822Contig1
GO:0007015	actin filament organization	P	2	605	25	14674	0.0819432	0.139087	1.94036	CL20341Contig1;CL38931Contig1
GO:0007498	mesoderm development	P	2	605	25	14674	0.0819432	0.139087	1.94036	comp99963_c0_seq3;CL15376Contig1
GO:0016757	transferase activity, transferring glycosyl groups	F	2	605	25	14674	0.0819432	0.139087	1.94036	CL60989Contig1;CL4780Contig1
GO:0048813	dendrite morphogenesis	P	2	605	25	14674	0.0819432	0.139087	1.94036	CL1267Contig1;CL15924Contig1
GO:0034220	ion transmembrane transport	P	12	605	205	14674	0.0821642	0.139314	1.41978	CL26807Contig1;CL37666Contig1;CL55371Contig1;CL2963Contig1;CL23639Contig1;CL72487Contig1;CL1102Contig1;CL14364Contig1;CL3482Contig1;CL46776Contig1;CL15982Contig1;CL40433Contig1
GO:0016020	membrane	C	26	605	494	14674	0.0830585	0.140682	1.27656	CL4287Contig1;CL54593Contig1;CL5783Contig1;CL1152Contig1;CL74275Contig1;CL53372Contig1;CL890Contig1;CL68252Contig1;CL8377Contig1;CL52163Contig1;CL3482Contig1;CL15702Contig1;comp112590_c1_seq4;CL56004Contig1;CL38853Contig1;CL4780Contig1;CL17768Contig1;CL7702Contig1;CL51794Contig1;CL14086Contig1;CL15597Contig1;CL69870Contig1;CL52423Contig1;CL72452Contig1;CL43632Contig1;CL3295Contig1
GO:0000387	spliceosomal snRNP assembly	P	1	605	12	14674	0.0852225	0.141362	2.02121	CL50686Contig1
GO:0005978	glycogen biosynthetic process	P	1	605	12	14674	0.0852225	0.141362	2.02121	CL53724Contig1
GO:0006284	base-excision repair	P	1	605	12	14674	0.0852225	0.141362	2.02121	CL57901Contig1
GO:0006298	mismatch repair	P	1	605	12	14674	0.0852225	0.141362	2.02121	comp8250_c0_seq1
GO:0006826	iron ion transport	P	1	605	12	14674	0.0852225	0.141362	2.02121	CL5149Contig1
GO:0009314	response to radiation	P	1	605	12	14674	0.0852225	0.141362	2.02121	CL57901Contig1
GO:0021634	optic nerve formation	P	1	605	12	14674	0.0852225	0.141362	2.02121	CL53372Contig1
GO:0021772	olfactory bulb development	P	1	605	12	14674	0.0852225	0.141362	2.02121	CL15376Contig1
GO:0035589	G-protein coupled purinergic nucleotide receptor signaling pathway	P	1	605	12	14674	0.0852225	0.141362	2.02121	CL58893Contig1
GO:0043330	response to exogenous dsRNA	P	1	605	12	14674	0.0852225	0.141362	2.02121	CL22031Contig1
GO:0048704	embryonic skeletal system morphogenesis	P	1	605	12	14674	0.0852225	0.141362	2.02121	CL75351Contig1
GO:0050662	coenzyme binding	F	1	605	12	14674	0.0852225	0.141362	2.02121	CL52300Contig1
GO:0050839	cell adhesion molecule binding	F	1	605	12	14674	0.0852225	0.141362	2.02121	CL5149Contig1
GO:0050999	regulation of nitric-oxide synthase activity	P	1	605	12	14674	0.0852225	0.141362	2.02121	comp99963_c0_seq3
GO:0051262	protein tetramerization	P	1	605	12	14674	0.0852225	0.141362	2.02121	CL54823Contig1
GO:0060079	regulation of excitatory postsynaptic membrane potential	P	1	605	12	14674	0.0852225	0.141362	2.02121	CL1102Contig1
GO:0060170	ciliary membrane	C	1	605	12	14674	0.0852225	0.141362	2.02121	CL13523Contig1
GO:0071356	cellular response to tumor necrosis factor	P	1	605	12	14674	0.0852225	0.141362	2.02121	CL52970Contig1
GO:0090179	planar cell polarity pathway involved in neural tube closure	P	1	605	12	14674	0.0852225	0.141362	2.02121	CL52970Contig1
GO:2000811	negative regulation of anoikis	P	1	605	12	14674	0.0852225	0.141362	2.02121	CL55052Contig1
GO:0006836	neurotransmitter transport	P	3	605	41	14674	0.0873412	0.144727	1.77472	CL2744Contig1;CL17264Contig1;CL15039Contig1
GO:0071805	potassium ion transmembrane transport	P	7	605	111	14674	0.0878352	0.145395	1.52957	CL66710Contig1;CL15142Contig1;CL13662Contig1;CL16855Contig1;CL5006Contig1;CL49864Contig1;CL5365Contig1
GO:0016301	kinase activity	F	6	605	93	14674	0.0891093	0.147352	1.56481	CL67300Contig1;CL38354Contig1;CL2400Contig1;CL73602Contig1;CL5971Contig1;CL52423Contig1
GO:0021766	hippocampus development	P	2	605	26	14674	0.0899201	0.148082	1.86573	comp70295_c0_seq1;comp70300_c0_seq1
GO:0030672	synaptic vesicle membrane	C	2	605	26	14674	0.0899201	0.148082	1.86573	CL60568Contig1;CL755Contig1
GO:0032880	regulation of protein localization	P	2	605	26	14674	0.0899201	0.148082	1.86573	CL55371Contig1;CL38931Contig1
GO:0043407	negative regulation of MAP kinase activity	P	2	605	26	14674	0.0899201	0.148082	1.86573	CL54823Contig1;CL16373Contig1
GO:0007169	transmembrane receptor protein tyrosine kinase signaling pathway	P	4	605	58	14674	0.0901219	0.148262	1.67273	CL29147Contig1;CL59115Contig1;CL14945Contig1;CL27176Contig1
GO:0000187	activation of MAPK activity	P	3	605	42	14674	0.093553	0.153435	1.73247	CL20341Contig1;CL47336Contig1;CL14945Contig1
GO:0004888	transmembrane signaling receptor activity	F	3	605	42	14674	0.093553	0.153435	1.73247	CL13993Contig1;CL8377Contig1;CL50754Contig1
GO:0007417	central nervous system development	P	3	605	42	14674	0.093553	0.153435	1.73247	CL29147Contig1;CL27176Contig1;CL55064Contig1
GO:0004803	transposase activity	F	4	605	59	14674	0.0953165	0.154435	1.64438	CL5261Contig1;CL12583Contig1;CL48106Contig1;comp103949_c0_seq2
GO:0006313	transposition, DNA-mediated	P	4	605	59	14674	0.0953165	0.154435	1.64438	CL5261Contig1;CL12583Contig1;CL48106Contig1;comp103949_c0_seq2
GO:0060041	retina development in camera-type eye	P	4	605	59	14674	0.0953165	0.154435	1.64438	CL3169Contig1;CL5149Contig1;CL55089Contig1;CL56191Contig1
GO:0046983	protein dimerization activity	F	10	605	171	14674	0.0963592	0.154435	1.41839	CL67300Contig1;comp112051_c2_seq4;CL68962Contig1;CL1958Contig1;comp88868_c0_seq1;CL56933Contig1;CL5971Contig1;CL51860Contig1;CL11804Contig1;CL18985Contig1
GO:0005874	microtubule	C	11	605	191	14674	0.0971594	0.154435	1.39686	CL69045Contig1;CL3868Contig1;CL57984Contig1;CL59252Contig1;CL13592Contig1;CL841Contig1;CL108Contig1;comp112602_c0_seq7;CL68159Contig1;CL26834Contig1;CL10260Contig1
GO:0000245	spliceosomal complex assembly	P	1	605	13	14674	0.0980562	0.154435	1.86573	CL50686Contig1
GO:0000792	heterochromatin	C	1	605	13	14674	0.0980562	0.154435	1.86573	CL13634Contig1
GO:0001917	photoreceptor inner segment	C	1	605	13	14674	0.0980562	0.154435	1.86573	CL3169Contig1
GO:0003727	single-stranded RNA binding	F	1	605	13	14674	0.0980562	0.154435	1.86573	CL13634Contig1
GO:0004889	acetylcholine-activated cation-selective channel activity	F	1	605	13	14674	0.0980562	0.154435	1.86573	CL51524Contig1
GO:0005164	tumor necrosis factor receptor binding	F	1	605	13	14674	0.0980562	0.154435	1.86573	CL56004Contig1
GO:0005319	lipid transporter activity	F	1	605	13	14674	0.0980562	0.154435	1.86573	CL47996Contig1
GO:0006662	glycerol ether metabolic process	P	1	605	13	14674	0.0980562	0.154435	1.86573	CL59308Contig1
GO:0007032	endosome organization	P	1	605	13	14674	0.0980562	0.154435	1.86573	CL14095Contig1
GO:0007281	germ cell development	P	1	605	13	14674	0.0980562	0.154435	1.86573	CL55941Contig1
GO:0008272	sulfate transport	P	1	605	13	14674	0.0980562	0.154435	1.86573	CL55371Contig1
GO:0009267	cellular response to starvation	P	1	605	13	14674	0.0980562	0.154435	1.86573	CL52970Contig1
GO:0009968	negative regulation of signal transduction	P	1	605	13	14674	0.0980562	0.154435	1.86573	CL13367Contig1
GO:0015293	symporter activity	F	1	605	13	14674	0.0980562	0.154435	1.86573	CL45141Contig1
GO:0016235	aggresome	C	1	605	13	14674	0.0980562	0.154435	1.86573	CL73740Contig1
GO:0016998	cell wall macromolecule catabolic process	P	1	605	13	14674	0.0980562	0.154435	1.86573	CL55298Contig1
GO:0021984	adenohypophysis development	P	1	605	13	14674	0.0980562	0.154435	1.86573	CL51349Contig1
GO:0030217	T cell differentiation	P	1	605	13	14674	0.0980562	0.154435	1.86573	CL327Contig1
GO:0030295	protein kinase activator activity	F	1	605	13	14674	0.0980562	0.154435	1.86573	CL55052Contig1
GO:0030506	ankyrin binding	F	1	605	13	14674	0.0980562	0.154435	1.86573	CL33624Contig1
GO:0031032	actomyosin structure organization	P	1	605	13	14674	0.0980562	0.154435	1.86573	CL56610Contig1
GO:0032924	activin receptor signaling pathway	P	1	605	13	14674	0.0980562	0.154435	1.86573	comp99963_c0_seq3
GO:0036092	phosphatidylinositol-3-phosphate biosynthetic process	P	1	605	13	14674	0.0980562	0.154435	1.86573	CL55052Contig1
GO:0042632	cholesterol homeostasis	P	1	605	13	14674	0.0980562	0.154435	1.86573	CL52281Contig1
GO:0045028	G-protein coupled purinergic nucleotide receptor activity	F	1	605	13	14674	0.0980562	0.154435	1.86573	CL58893Contig1
GO:0045176	apical protein localization	P	1	605	13	14674	0.0980562	0.154435	1.86573	CL7671Contig1
GO:0045931	positive regulation of mitotic cell cycle	P	1	605	13	14674	0.0980562	0.154435	1.86573	CL44822Contig1
GO:0048147	negative regulation of fibroblast proliferation	P	1	605	13	14674	0.0980562	0.154435	1.86573	CL52970Contig1
GO:0050732	negative regulation of peptidyl-tyrosine phosphorylation	P	1	605	13	14674	0.0980562	0.154435	1.86573	CL52970Contig1
GO:0050796	regulation of insulin secretion	P	1	605	13	14674	0.0980562	0.154435	1.86573	CL287Contig1
GO:0072332	intrinsic apoptotic signaling pathway by p53 class mediator	P	1	605	13	14674	0.0980562	0.154435	1.86573	CL2517Contig1
GO:0001558	regulation of cell growth	P	2	605	27	14674	0.0982066	0.154435	1.79663	CL52253Contig1;CL4549Contig1
GO:0004519	endonuclease activity	F	2	605	27	14674	0.0982066	0.154435	1.79663	comp8250_c0_seq1;CL72691Contig1
GO:0008217	regulation of blood pressure	P	2	605	27	14674	0.0982066	0.154435	1.79663	CL16855Contig1;CL5365Contig1
GO:0008542	visual learning	P	2	605	27	14674	0.0982066	0.154435	1.79663	CL54823Contig1;CL71697Contig1
GO:0016049	cell growth	P	2	605	27	14674	0.0982066	0.154435	1.79663	CL2400Contig1;CL57172Contig1
GO:0032496	response to lipopolysaccharide	P	2	605	27	14674	0.0982066	0.154435	1.79663	CL55941Contig1;CL59086Contig1
GO:0030176	integral component of endoplasmic reticulum membrane	C	3	605	43	14674	0.0999678	0.15705	1.69218	CL15079Contig1;CL15376Contig1;CL54204Contig1
GO:0004725	protein tyrosine phosphatase activity	F	8	605	134	14674	0.102284	0.160532	1.44803	CL52300Contig1;CL53834Contig1;CL54788Contig1;CL12585Contig1;CL2172Contig1;CL16128Contig1;CL56663Contig1;CL44198Contig1
GO:0045211	postsynaptic membrane	C	9	605	154	14674	0.104405	0.1637	1.41747	CL26807Contig1;CL2963Contig1;CL23639Contig1;CL72487Contig1;CL1102Contig1;CL55688Contig1;CL51524Contig1;CL52554Contig1;CL13523Contig1
GO:0006869	lipid transport	P	3	605	44	14674	0.10658	0.166948	1.65372	CL15735Contig1;CL51542Contig1;CL47996Contig1
GO:0016358	dendrite development	P	2	605	28	14674	0.106788	0.166948	1.73247	CL842Contig1;CL3169Contig1
GO:0034968	histone lysine methylation	P	2	605	28	14674	0.106788	0.166948	1.73247	CL54389Contig1;CL44267Contig1
GO:0000160	phosphorelay signal transduction system	P	1	605	14	14674	0.111387	0.170972	1.73247	CL5006Contig1
GO:0001540	beta-amyloid binding	F	1	605	14	14674	0.111387	0.170972	1.73247	CL49087Contig1
GO:0004012	phospholipid-translocating ATPase activity	F	1	605	14	14674	0.111387	0.170972	1.73247	CL15982Contig1
GO:0005496	steroid binding	F	1	605	14	14674	0.111387	0.170972	1.73247	CL51548Contig1
GO:0006939	smooth muscle contraction	P	1	605	14	14674	0.111387	0.170972	1.73247	CL51524Contig1
GO:0007157	heterophilic cell-cell adhesion via plasma membrane cell adhesion molecules	P	1	605	14	14674	0.111387	0.170972	1.73247	CL5149Contig1
GO:0008345	larval locomotory behavior	P	1	605	14	14674	0.111387	0.170972	1.73247	CL56296Contig1
GO:0010575	positive regulation vascular endothelial growth factor production	P	1	605	14	14674	0.111387	0.170972	1.73247	CL38822Contig1
GO:0016788	hydrolase activity, acting on ester bonds	F	1	605	14	14674	0.111387	0.170972	1.73247	CL37903Contig1
GO:0021794	thalamus development	P	1	605	14	14674	0.111387	0.170972	1.73247	CL55248Contig1
GO:0021986	habenula development	P	1	605	14	14674	0.111387	0.170972	1.73247	CL15079Contig1
GO:0031418	L-ascorbic acid binding	F	1	605	14	14674	0.111387	0.170972	1.73247	CL18223Contig1
GO:0045429	positive regulation of nitric oxide biosynthetic process	P	1	605	14	14674	0.111387	0.170972	1.73247	CL52583Contig1
GO:0045746	negative regulation of Notch signaling pathway	P	1	605	14	14674	0.111387	0.170972	1.73247	CL7671Contig1
GO:0048557	embryonic digestive tract morphogenesis	P	1	605	14	14674	0.111387	0.170972	1.73247	CL53372Contig1
GO:0060716	labyrinthine layer blood vessel development	P	1	605	14	14674	0.111387	0.170972	1.73247	CL54671Contig1
GO:0070373	negative regulation of ERK1 and ERK2 cascade	P	1	605	14	14674	0.111387	0.170972	1.73247	CL16373Contig1
GO:0071773	cellular response to BMP stimulus	P	1	605	14	14674	0.111387	0.170972	1.73247	CL52970Contig1
GO:0090103	cochlea morphogenesis	P	1	605	14	14674	0.111387	0.170972	1.73247	CL53372Contig1
GO:0030218	erythrocyte differentiation	P	3	605	45	14674	0.113385	0.173872	1.61697	comp99216_c0_seq1;CL16017Contig1;CL55591Contig1
GO:0005814	centriole	C	2	605	29	14674	0.11565	0.177006	1.67273	CL51891Contig1;CL44822Contig1
GO:0021987	cerebral cortex development	P	2	605	29	14674	0.11565	0.177006	1.67273	comp70295_c0_seq1;comp70300_c0_seq1
GO:0005783	endoplasmic reticulum	C	13	605	238	14674	0.115827	0.177109	1.32483	CL37666Contig1;CL59308Contig1;comp110218_c0_seq22;CL56067Contig1;CL890Contig1;CL2400Contig1;CL18223Contig1;CL47151Contig1;CL15982Contig1;CL71432Contig1;CL8700Contig1;CL16373Contig1;CL58979Contig1
GO:0030246	carbohydrate binding	F	7	605	119	14674	0.118441	0.180933	1.42674	CL59822Contig1;CL53825Contig1;CL55978Contig1;CL44945Contig1;CL55476Contig1;CL71735Contig1;CL35807Contig1
GO:0030054	cell junction	C	12	605	219	14674	0.120095	0.183286	1.32902	CL26807Contig1;CL60568Contig1;CL2963Contig1;CL23639Contig1;CL72487Contig1;CL1102Contig1;CL55688Contig1;CL51524Contig1;CL52554Contig1;CL13523Contig1;CL4198Contig1;CL1895Contig1
GO:0018022	peptidyl-lysine methylation	P	2	605	30	14674	0.124777	0.185533	1.61697	CL54389Contig1;CL44267Contig1
GO:0018024	histone-lysine N-methyltransferase activity	F	2	605	30	14674	0.124777	0.185533	1.61697	CL54389Contig1;CL44267Contig1
GO:0051897	positive regulation of protein kinase B signaling	P	2	605	30	14674	0.124777	0.185533	1.61697	CL19349Contig1;CL56191Contig1
GO:0001784	phosphotyrosine binding	F	1	605	15	14674	0.125154	0.185533	1.61697	comp66281_c0_seq1
GO:0001968	fibronectin binding	F	1	605	15	14674	0.125154	0.185533	1.61697	CL52047Contig1
GO:0002042	cell migration involved in sprouting angiogenesis	P	1	605	15	14674	0.125154	0.185533	1.61697	CL55941Contig1
GO:0002076	osteoblast development	P	1	605	15	14674	0.125154	0.185533	1.61697	CL53372Contig1
GO:0007163	establishment or maintenance of cell polarity	P	1	605	15	14674	0.125154	0.185533	1.61697	CL50754Contig1
GO:0007565	female pregnancy	P	1	605	15	14674	0.125154	0.185533	1.61697	CL58918Contig1
GO:0008093	cytoskeletal adaptor activity	F	1	605	15	14674	0.125154	0.185533	1.61697	CL53499Contig1
GO:0008236	serine-type peptidase activity	F	1	605	15	14674	0.125154	0.185533	1.61697	CL43817Contig1
GO:0010212	response to ionizing radiation	P	1	605	15	14674	0.125154	0.185533	1.61697	CL18595Contig1
GO:0016485	protein processing	P	1	605	15	14674	0.125154	0.185533	1.61697	CL22723Contig1
GO:0021508	floor plate formation	P	1	605	15	14674	0.125154	0.185533	1.61697	CL53372Contig1
GO:0030279	negative regulation of ossification	P	1	605	15	14674	0.125154	0.185533	1.61697	CL52970Contig1
GO:0030374	ligand-dependent nuclear receptor transcription coactivator activity	F	1	605	15	14674	0.125154	0.185533	1.61697	CL55298Contig1
GO:0043395	heparan sulfate proteoglycan binding	F	1	605	15	14674	0.125154	0.185533	1.61697	CL13429Contig1
GO:0043491	protein kinase B signaling	P	1	605	15	14674	0.125154	0.185533	1.61697	CL55089Contig1
GO:0045165	cell fate commitment	P	1	605	15	14674	0.125154	0.185533	1.61697	CL57605Contig1
GO:0045862	positive regulation of proteolysis	P	1	605	15	14674	0.125154	0.185533	1.61697	CL67774Contig1
GO:0046907	intracellular transport	P	1	605	15	14674	0.125154	0.185533	1.61697	CL39382Contig1
GO:0048265	response to pain	P	1	605	15	14674	0.125154	0.185533	1.61697	CL71697Contig1
GO:0048661	positive regulation of smooth muscle cell proliferation	P	1	605	15	14674	0.125154	0.185533	1.61697	CL56191Contig1
GO:0051209	release of sequestered calcium ion into cytosol	P	1	605	15	14674	0.125154	0.185533	1.61697	CL57605Contig1
GO:0060174	limb bud formation	P	1	605	15	14674	0.125154	0.185533	1.61697	CL5783Contig1
GO:0060215	primitive hemopoiesis	P	1	605	15	14674	0.125154	0.185533	1.61697	CL47089Contig1
GO:0060956	endocardial cell differentiation	P	1	605	15	14674	0.125154	0.185533	1.61697	CL53332Contig1
GO:0071277	cellular response to calcium ion	P	1	605	15	14674	0.125154	0.185533	1.61697	CL67774Contig1
GO:0072372	primary cilium	C	1	605	15	14674	0.125154	0.185533	1.61697	CL68252Contig1
GO:0086005	ventricular cardiac muscle cell action potential	P	1	605	15	14674	0.125154	0.185533	1.61697	CL15665Contig1
GO:0090303	positive regulation of wound healing	P	1	605	15	14674	0.125154	0.185533	1.61697	CL56191Contig1
GO:0008076	voltage-gated potassium channel complex	C	3	605	47	14674	0.127549	0.188561	1.54816	CL15142Contig1;CL55248Contig1;CL33624Contig1
GO:0009887	organ morphogenesis	P	3	605	47	14674	0.127549	0.188561	1.54816	CL55941Contig1;CL34434Contig1;CL39499Contig1
GO:0045766	positive regulation of angiogenesis	P	3	605	47	14674	0.127549	0.188561	1.54816	CL53494Contig1;CL38822Contig1;CL44822Contig1
GO:0051015	actin filament binding	F	4	605	65	14674	0.129523	0.191303	1.49259	CL3169Contig1;CL68962Contig1;CL7053Contig1;CL56933Contig1
GO:0035335	peptidyl-tyrosine dephosphorylation	P	8	605	142	14674	0.132608	0.195674	1.36645	CL52300Contig1;CL53834Contig1;CL54788Contig1;CL12585Contig1;CL2172Contig1;CL16128Contig1;CL56663Contig1;CL44198Contig1
GO:0001764	neuron migration	P	5	605	84	14674	0.132726	0.195674	1.44372	CL842Contig1;CL15924Contig1;comp70295_c0_seq1;comp70300_c0_seq1;CL55941Contig1
GO:0006633	fatty acid biosynthetic process	P	2	605	31	14674	0.134154	0.196874	1.56481	CL49906Contig1;CL56613Contig1
GO:0008092	cytoskeletal protein binding	F	2	605	31	14674	0.134154	0.196874	1.56481	comp96179_c1_seq3;CL49837Contig1
GO:0030155	regulation of cell adhesion	P	2	605	31	14674	0.134154	0.196874	1.56481	CL53522Contig1;CL14671Contig1
GO:0051781	positive regulation of cell division	P	2	605	31	14674	0.134154	0.196874	1.56481	CL57172Contig1;CL13429Contig1
GO:0070121	Kupffer's vesicle development	P	2	605	31	14674	0.134154	0.196874	1.56481	CL75180Contig1;CL52047Contig1
GO:0005096	GTPase activator activity	F	6	605	104	14674	0.137711	0.200928	1.3993	CL10939Contig1;CL67747Contig1;CL13997Contig1;CL53704Contig1;CL53499Contig1;CL51361Contig1
GO:0009055	electron carrier activity	F	5	605	85	14674	0.138172	0.200928	1.42674	CL59308Contig1;CL52073Contig1;CL67196Contig1;CL2971Contig1;CL15597Contig1
GO:0000145	exocyst	C	1	605	16	14674	0.139296	0.200928	1.51591	CL1367Contig1
GO:0000155	phosphorelay sensor kinase activity	F	1	605	16	14674	0.139296	0.200928	1.51591	CL5006Contig1
GO:0000775	chromosome, centromeric region	C	1	605	16	14674	0.139296	0.200928	1.51591	CL55109Contig1
GO:0001731	formation of translation preinitiation complex	P	1	605	16	14674	0.139296	0.200928	1.51591	CL58893Contig1
GO:0005267	potassium channel activity	F	1	605	16	14674	0.139296	0.200928	1.51591	CL49864Contig1
GO:0005977	glycogen metabolic process	P	1	605	16	14674	0.139296	0.200928	1.51591	CL51418Contig1
GO:0006986	response to unfolded protein	P	1	605	16	14674	0.139296	0.200928	1.51591	CL73602Contig1
GO:0008015	blood circulation	P	1	605	16	14674	0.139296	0.200928	1.51591	CL53372Contig1
GO:0019722	calcium-mediated signaling	P	1	605	16	14674	0.139296	0.200928	1.51591	CL18310Contig1
GO:0031072	heat shock protein binding	F	1	605	16	14674	0.139296	0.200928	1.51591	CL51618Contig1
GO:0033290	eukaryotic 48S preinitiation complex	C	1	605	16	14674	0.139296	0.200928	1.51591	CL58893Contig1
GO:0035176	social behavior	P	1	605	16	14674	0.139296	0.200928	1.51591	CL13523Contig1
GO:0043049	otic placode formation	P	1	605	16	14674	0.139296	0.200928	1.51591	CL75180Contig1
GO:0044297	cell body	C	1	605	16	14674	0.139296	0.200928	1.51591	CL69045Contig1
GO:0050918	positive chemotaxis	P	1	605	16	14674	0.139296	0.200928	1.51591	CL55941Contig1
GO:0051259	protein oligomerization	P	1	605	16	14674	0.139296	0.200928	1.51591	CL13523Contig1
GO:0071560	cellular response to transforming growth factor beta stimulus	P	1	605	16	14674	0.139296	0.200928	1.51591	CL52970Contig1
GO:0004714	transmembrane receptor protein tyrosine kinase activity	F	4	605	67	14674	0.142014	0.204663	1.44803	CL44463Contig1;CL29147Contig1;CL14945Contig1;CL27176Contig1
GO:0006334	nucleosome assembly	P	3	605	49	14674	0.142409	0.205049	1.48497	CL52165Contig1;CL4383Contig1;CL47996Contig1
GO:0042995	cell projection	C	2	605	32	14674	0.143766	0.206816	1.51591	CL4157Contig1;CL52970Contig1
GO:0008237	metallopeptidase activity	F	2	605	33	14674	0.153596	0.218453	1.46997	CL56572Contig1;CL42339Contig1
GO:0005852	eukaryotic translation initiation factor 3 complex	C	1	605	17	14674	0.153762	0.218453	1.42674	CL58893Contig1
GO:0006302	double-strand break repair	P	1	605	17	14674	0.153762	0.218453	1.42674	CL18595Contig1
GO:0007257	activation of JUN kinase activity	P	1	605	17	14674	0.153762	0.218453	1.42674	CL2033Contig1
GO:0009954	proximal/distal pattern formation	P	1	605	17	14674	0.153762	0.218453	1.42674	CL53372Contig1
GO:0021523	somatic motor neuron differentiation	P	1	605	17	14674	0.153762	0.218453	1.42674	CL53372Contig1
GO:0031674	I band	C	1	605	17	14674	0.153762	0.218453	1.42674	CL18996Contig1
GO:0032720	negative regulation of tumor necrosis factor production	P	1	605	17	14674	0.153762	0.218453	1.42674	CL16373Contig1
GO:0035115	embryonic forelimb morphogenesis	P	1	605	17	14674	0.153762	0.218453	1.42674	CL75351Contig1
GO:0043085	positive regulation of catalytic activity	P	1	605	17	14674	0.153762	0.218453	1.42674	CL46988Contig1
GO:0045648	positive regulation of erythrocyte differentiation	P	1	605	17	14674	0.153762	0.218453	1.42674	comp99963_c0_seq3
GO:0045880	positive regulation of smoothened signaling pathway	P	1	605	17	14674	0.153762	0.218453	1.42674	CL52970Contig1
GO:0051537	2 iron, 2 sulfur cluster binding	F	1	605	17	14674	0.153762	0.218453	1.42674	CL67196Contig1
GO:0060042	retina morphogenesis in camera-type eye	P	1	605	17	14674	0.153762	0.218453	1.42674	CL13367Contig1
GO:0006457	protein folding	P	5	605	88	14674	0.155117	0.219989	1.3781	CL73602Contig1;CL13592Contig1;CL52723Contig1;CL51618Contig1;CL44770Contig1
GO:0030018	Z disc	C	5	605	88	14674	0.155117	0.219989	1.3781	CL15665Contig1;CL68962Contig1;CL45317Contig1;CL67774Contig1;CL56933Contig1
GO:0051092	positive regulation of NF-kappaB transcription factor activity	P	3	605	51	14674	0.157914	0.223758	1.42674	CL20341Contig1;CL47336Contig1;CL67774Contig1
GO:0005759	mitochondrial matrix	C	2	605	34	14674	0.163631	0.23145	1.42674	CL73602Contig1;CL51474Contig1
GO:0007389	pattern specification process	P	2	605	34	14674	0.163631	0.23145	1.42674	CL75351Contig1;comp97737_c0_seq1
GO:0001541	ovarian follicle development	P	1	605	18	14674	0.168498	0.235019	1.34747	CL43817Contig1
GO:0001757	somite specification	P	1	605	18	14674	0.168498	0.235019	1.34747	CL53332Contig1
GO:0001964	startle response	P	1	605	18	14674	0.168498	0.235019	1.34747	CL1102Contig1
GO:0004143	diacylglycerol kinase activity	F	1	605	18	14674	0.168498	0.235019	1.34747	CL973Contig1
GO:0005248	voltage-gated sodium channel activity	F	1	605	18	14674	0.168498	0.235019	1.34747	CL49004Contig1
GO:0005637	nuclear inner membrane	C	1	605	18	14674	0.168498	0.235019	1.34747	CL54204Contig1
GO:0006338	chromatin remodeling	P	1	605	18	14674	0.168498	0.235019	1.34747	CL34434Contig1
GO:0006635	fatty acid beta-oxidation	P	1	605	18	14674	0.168498	0.235019	1.34747	CL16373Contig1
GO:0008630	intrinsic apoptotic signaling pathway in response to DNA damage	P	1	605	18	14674	0.168498	0.235019	1.34747	CL57901Contig1
GO:0010468	regulation of gene expression	P	1	605	18	14674	0.168498	0.235019	1.34747	CL49087Contig1
GO:0016282	eukaryotic 43S preinitiation complex	C	1	605	18	14674	0.168498	0.235019	1.34747	CL58893Contig1
GO:0030099	myeloid cell differentiation	P	1	605	18	14674	0.168498	0.235019	1.34747	CL47089Contig1
GO:0042692	muscle cell differentiation	P	1	605	18	14674	0.168498	0.235019	1.34747	CL1267Contig1
GO:0043523	regulation of neuron apoptotic process	P	1	605	18	14674	0.168498	0.235019	1.34747	CL47089Contig1
GO:0050680	negative regulation of epithelial cell proliferation	P	1	605	18	14674	0.168498	0.235019	1.34747	CL52970Contig1
GO:0060028	convergent extension involved in axis elongation	P	1	605	18	14674	0.168498	0.235019	1.34747	CL57605Contig1
GO:0006461	protein complex assembly	P	2	605	35	14674	0.173855	0.242068	1.38597	CL67774Contig1;CL5466Contig1
GO:0042393	histone binding	F	2	605	35	14674	0.173855	0.242068	1.38597	CL18595Contig1;CL6160Contig1
GO:0006811	ion transport	P	3	605	54	14674	0.182259	0.251943	1.34747	CL15990Contig1;CL51524Contig1;CL52554Contig1
GO:0007596	blood coagulation	P	4	605	73	14674	0.182363	0.251943	1.32902	CL2689Contig1;CL19349Contig1;CL32123Contig1;CL52409Contig1
GO:0006631	fatty acid metabolic process	P	1	605	19	14674	0.18346	0.251943	1.27656	CL52176Contig1
GO:0008408	3'-5' exonuclease activity	F	1	605	19	14674	0.18346	0.251943	1.27656	comp8250_c0_seq1
GO:0009948	anterior/posterior axis specification	P	1	605	19	14674	0.18346	0.251943	1.27656	CL75180Contig1
GO:0009950	dorsal/ventral axis specification	P	1	605	19	14674	0.18346	0.251943	1.27656	CL52970Contig1
GO:0015914	phospholipid transport	P	1	605	19	14674	0.18346	0.251943	1.27656	CL15982Contig1
GO:0032281	alpha-amino-3-hydroxy-5-methyl-4-isoxazolepropionic acid selective glutamate receptor complex	C	1	605	19	14674	0.18346	0.251943	1.27656	CL55688Contig1
GO:0043027	cysteine-type endopeptidase inhibitor activity involved in apoptotic process	F	1	605	19	14674	0.18346	0.251943	1.27656	CL44822Contig1
GO:0045600	positive regulation of fat cell differentiation	P	1	605	19	14674	0.18346	0.251943	1.27656	CL52970Contig1
GO:0045664	regulation of neuron differentiation	P	1	605	19	14674	0.18346	0.251943	1.27656	CL14945Contig1
GO:0045786	negative regulation of cell cycle	P	1	605	19	14674	0.18346	0.251943	1.27656	CL58918Contig1
GO:0048706	embryonic skeletal system development	P	1	605	19	14674	0.18346	0.251943	1.27656	comp99963_c0_seq3
GO:0050900	leukocyte migration	P	1	605	19	14674	0.18346	0.251943	1.27656	CL71697Contig1
GO:0060026	convergent extension	P	1	605	19	14674	0.18346	0.251943	1.27656	CL55064Contig1
GO:0097110	scaffold protein binding	F	1	605	19	14674	0.18346	0.251943	1.27656	CL13523Contig1
GO:0045087	innate immune response	P	8	605	154	14674	0.185786	0.254919	1.25998	CL2033Contig1;CL44463Contig1;CL22031Contig1;CL24273Contig1;CL1809Contig1;CL56004Contig1;CL13727Contig1;CL66Contig1
GO:0008138	protein tyrosine/serine/threonine phosphatase activity	F	2	605	37	14674	0.194808	0.26707	1.31106	CL53834Contig1;CL56663Contig1
GO:0030036	actin cytoskeleton organization	P	4	605	75	14674	0.196668	0.268827	1.29358	CL51873Contig1;CL16349Contig1;CL14542Contig1;CL45317Contig1
GO:0002062	chondrocyte differentiation	P	1	605	20	14674	0.198603	0.268827	1.21273	CL57605Contig1
GO:0006024	glycosaminoglycan biosynthetic process	P	1	605	20	14674	0.198603	0.268827	1.21273	CL15376Contig1
GO:0006885	regulation of pH	P	1	605	20	14674	0.198603	0.268827	1.21273	CL55371Contig1
GO:0007608	sensory perception of smell	P	1	605	20	14674	0.198603	0.268827	1.21273	CL18310Contig1
GO:0008603	cAMP-dependent protein kinase regulator activity	F	1	605	20	14674	0.198603	0.268827	1.21273	CL68252Contig1
GO:0009888	tissue development	P	1	605	20	14674	0.198603	0.268827	1.21273	comp97737_c0_seq1
GO:0016705	oxidoreductase activity, acting on paired donors, with incorporation or reduction of molecular oxygen	F	1	605	20	14674	0.198603	0.268827	1.21273	CL2971Contig1
GO:0016747	transferase activity, transferring acyl groups other than amino-acyl groups	F	1	605	20	14674	0.198603	0.268827	1.21273	CL4383Contig1
GO:0045599	negative regulation of fat cell differentiation	P	1	605	20	14674	0.198603	0.268827	1.21273	CL16373Contig1
GO:0045773	positive regulation of axon extension	P	1	605	20	14674	0.198603	0.268827	1.21273	CL41294Contig1
GO:0048264	determination of ventral identity	P	1	605	20	14674	0.198603	0.268827	1.21273	CL75180Contig1
GO:0048821	erythrocyte development	P	1	605	20	14674	0.198603	0.268827	1.21273	CL2517Contig1
GO:0050731	positive regulation of peptidyl-tyrosine phosphorylation	P	1	605	20	14674	0.198603	0.268827	1.21273	CL2033Contig1
GO:0051087	chaperone binding	F	1	605	20	14674	0.198603	0.268827	1.21273	CL73602Contig1
GO:0046872	metal ion binding	F	53	605	1165	14674	0.198831	0.268908	1.10343	CL54999Contig1;CL45726Contig1;comp42969_c0_seq1;CL15015Contig1;CL43249Contig1;CL37903Contig1;CL45937Contig1;CL66710Contig1;comp99963_c0_seq3;CL38354Contig1;CL56572Contig1;CL61982Contig1;CL15504Contig1;CL52332Contig1;CL44781Contig1;CL4659Contig1;CL3172Contig1;CL46776Contig1;CL12585Contig1;CL16855Contig1;CL1809Contig1;CL25028Contig1;CL18361Contig1;comp94537_c0_seq6;CL13727Contig1;CL2394Contig1;CL72…
GO:0007010	cytoskeleton organization	P	2	605	38	14674	0.205508	0.277237	1.27656	CL17362Contig1;CL54980Contig1
GO:0008305	integrin complex	C	2	605	38	14674	0.205508	0.277237	1.27656	CL53574Contig1;CL52047Contig1
GO:0023014	signal transduction by phosphorylation	P	2	605	38	14674	0.205508	0.277237	1.27656	comp99963_c0_seq3;CL5006Contig1
GO:0019013	viral nucleocapsid	C	3	605	57	14674	0.207739	0.280012	1.27656	comp112590_c1_seq4;CL17768Contig1;CL50686Contig1
GO:0007399	nervous system development	P	4	605	77	14674	0.211345	0.284474	1.25998	CL92Contig1;CL1520Contig1;CL59332Contig1;CL49087Contig1
GO:0001934	positive regulation of protein phosphorylation	P	1	605	21	14674	0.213887	0.284474	1.15498	CL38822Contig1
GO:0001975	response to amphetamine	P	1	605	21	14674	0.213887	0.284474	1.15498	CL71697Contig1
GO:0003950	NAD+ ADP-ribosyltransferase activity	F	1	605	21	14674	0.213887	0.284474	1.15498	CL53773Contig1
GO:0004716	receptor signaling protein tyrosine kinase activity	F	1	605	21	14674	0.213887	0.284474	1.15498	CL2033Contig1
GO:0005070	SH3/SH2 adaptor activity	F	1	605	21	14674	0.213887	0.284474	1.15498	CL59115Contig1
GO:0005689	U12-type spliceosomal complex	C	1	605	21	14674	0.213887	0.284474	1.15498	CL50686Contig1
GO:0007422	peripheral nervous system development	P	1	605	21	14674	0.213887	0.284474	1.15498	CL9484Contig1
GO:0008158	hedgehog receptor activity	F	1	605	21	14674	0.213887	0.284474	1.15498	CL1890Contig1
GO:0015035	protein disulfide oxidoreductase activity	F	1	605	21	14674	0.213887	0.284474	1.15498	CL59308Contig1
GO:0021915	neural tube development	P	1	605	21	14674	0.213887	0.284474	1.15498	CL5783Contig1
GO:0035690	cellular response to drug	P	1	605	21	14674	0.213887	0.284474	1.15498	CL16373Contig1
GO:0043588	skin development	P	1	605	21	14674	0.213887	0.284474	1.15498	CL22723Contig1
GO:0046854	phosphatidylinositol phosphorylation	P	1	605	21	14674	0.213887	0.284474	1.15498	CL55052Contig1
GO:0051090	regulation of sequence-specific DNA binding transcription factor activity	P	1	605	21	14674	0.213887	0.284474	1.15498	comp97737_c0_seq1
GO:0072661	protein targeting to plasma membrane	P	1	605	21	14674	0.213887	0.284474	1.15498	CL9484Contig1
GO:0005179	hormone activity	F	2	605	39	14674	0.216338	0.287019	1.24382	CL56067Contig1;CL16373Contig1
GO:0007224	smoothened signaling pathway	P	2	605	39	14674	0.216338	0.287019	1.24382	CL1890Contig1;CL54671Contig1
GO:0042787	protein ubiquitination involved in ubiquitin-dependent protein catabolic process	P	2	605	39	14674	0.216338	0.287019	1.24382	CL32272Contig1;CL3483Contig1
GO:0010951	negative regulation of endopeptidase activity	P	4	605	78	14674	0.218813	0.290062	1.24382	CL57952Contig1;CL55064Contig1;CL38822Contig1;CL9871Contig1
GO:0004872	receptor activity	F	6	605	119	14674	0.22022	0.291687	1.22292	CL5783Contig1;CL53574Contig1;CL15702Contig1;CL52047Contig1;CL5149Contig1;CL3295Contig1
GO:0016491	oxidoreductase activity	F	5	605	99	14674	0.224104	0.296587	1.22498	CL45726Contig1;CL8209Contig1;CL55935Contig1;CL57908Contig1;CL54932Contig1
GO:0006954	inflammatory response	P	3	605	59	14674	0.225262	0.297382	1.23328	CL44463Contig1;CL2400Contig1;CL59086Contig1
GO:0007179	transforming growth factor beta receptor signaling pathway	P	3	605	59	14674	0.225262	0.297382	1.23328	CL58918Contig1;CL44875Contig1;CL9299Contig1
GO:0030198	extracellular matrix organization	P	3	605	59	14674	0.225262	0.297382	1.23328	CL66710Contig1;CL16855Contig1;CL5365Contig1
GO:0001822	kidney development	P	2	605	40	14674	0.227284	0.298505	1.21273	CL35022Contig1;CL51095Contig1
GO:0016740	transferase activity	F	2	605	40	14674	0.227284	0.298505	1.21273	CL8849Contig1;CL15524Contig1
GO:0018108	peptidyl-tyrosine phosphorylation	P	2	605	40	14674	0.227284	0.298505	1.21273	CL2033Contig1;comp66281_c0_seq1
GO:0030175	filopodium	C	2	605	40	14674	0.227284	0.298505	1.21273	CL68962Contig1;CL56933Contig1
GO:0030659	cytoplasmic vesicle membrane	C	2	605	40	14674	0.227284	0.298505	1.21273	comp70295_c0_seq1;comp70300_c0_seq1
GO:0001657	ureteric bud development	P	1	605	22	14674	0.229275	0.298505	1.10248	CL52970Contig1
GO:0003684	damaged DNA binding	F	1	605	22	14674	0.229275	0.298505	1.10248	CL51600Contig1
GO:0005520	insulin-like growth factor binding	F	1	605	22	14674	0.229275	0.298505	1.10248	CL4549Contig1
GO:0006446	regulation of translational initiation	P	1	605	22	14674	0.229275	0.298505	1.10248	CL58893Contig1
GO:0007205	protein kinase C-activating G-protein coupled receptor signaling pathway	P	1	605	22	14674	0.229275	0.298505	1.10248	CL973Contig1
GO:0008406	gonad development	P	1	605	22	14674	0.229275	0.298505	1.10248	CL51317Contig1
GO:0022625	cytosolic large ribosomal subunit	C	1	605	22	14674	0.229275	0.298505	1.10248	CL69861Contig1
GO:0032947	protein complex scaffold	F	1	605	22	14674	0.229275	0.298505	1.10248	CL67774Contig1
GO:0043198	dendritic shaft	C	1	605	22	14674	0.229275	0.298505	1.10248	CL55688Contig1
GO:0048546	digestive tract morphogenesis	P	1	605	22	14674	0.229275	0.298505	1.10248	CL52970Contig1
GO:0048565	digestive tract development	P	1	605	22	14674	0.229275	0.298505	1.10248	CL4969Contig1
GO:0050728	negative regulation of inflammatory response	P	1	605	22	14674	0.229275	0.298505	1.10248	CL16373Contig1
GO:0016874	ligase activity	F	6	605	121	14674	0.232369	0.302286	1.2027	CL59013Contig1;CL68407Contig1;CL18595Contig1;CL65547Contig1;CL68929Contig1;CL32272Contig1
GO:0006821	chloride transport	P	3	605	60	14674	0.234162	0.304372	1.21273	CL54593Contig1;CL37666Contig1;CL55371Contig1
GO:0005102	receptor binding	F	5	605	101	14674	0.237617	0.308613	1.20072	CL20341Contig1;CL53522Contig1;CL47336Contig1;CL74442Contig1;CL14671Contig1
GO:0004386	helicase activity	F	2	605	41	14674	0.238332	0.308793	1.18315	CL51794Contig1;CL55109Contig1
GO:0006470	protein dephosphorylation	P	2	605	41	14674	0.238332	0.308793	1.18315	CL47151Contig1;CL71432Contig1
GO:0042626	ATPase activity, coupled to transmembrane movement of substances	F	2	605	41	14674	0.238332	0.308793	1.18315	CL3988Contig1;CL47996Contig1
GO:0007283	spermatogenesis	P	5	605	102	14674	0.244465	0.314041	1.18895	comp99963_c0_seq3;CL48013Contig1;CL55089Contig1;CL22723Contig1;CL43817Contig1
GO:0001702	gastrulation with mouth forming second	P	1	605	23	14674	0.244733	0.314041	1.05455	comp99963_c0_seq3
GO:0009612	response to mechanical stimulus	P	1	605	23	14674	0.244733	0.314041	1.05455	CL59086Contig1
GO:0010862	positive regulation of pathway-restricted SMAD protein phosphorylation	P	1	605	23	14674	0.244733	0.314041	1.05455	comp99963_c0_seq3
GO:0032355	response to estradiol	P	1	605	23	14674	0.244733	0.314041	1.05455	CL51548Contig1
GO:0035116	embryonic hindlimb morphogenesis	P	1	605	23	14674	0.244733	0.314041	1.05455	CL75351Contig1
GO:0035914	skeletal muscle cell differentiation	P	1	605	23	14674	0.244733	0.314041	1.05455	CL3483Contig1
GO:0038084	vascular endothelial growth factor signaling pathway	P	1	605	23	14674	0.244733	0.314041	1.05455	CL44463Contig1
GO:0043204	perikaryon	C	1	605	23	14674	0.244733	0.314041	1.05455	CL55248Contig1
GO:0048754	branching morphogenesis of an epithelial tube	P	1	605	23	14674	0.244733	0.314041	1.05455	CL53372Contig1
GO:0060037	pharyngeal system development	P	1	605	23	14674	0.244733	0.314041	1.05455	CL52638Contig1
GO:0071407	cellular response to organic cyclic compound	P	1	605	23	14674	0.244733	0.314041	1.05455	CL53372Contig1
GO:0016021	integral component of membrane	C	112	605	2579	14674	0.248597	0.318745	1.05332	CL26807Contig1;CL59013Contig1;CL60568Contig1;CL45726Contig1;CL21873Contig1;comp42969_c0_seq1;CL51934Contig1;CL55371Contig1;comp96179_c1_seq3;CL10814Contig1;CL8209Contig1;CL1618Contig1;CL56578Contig1;CL49344Contig1;comp99580_c0_seq1;CL52119Contig1;CL13483Contig1;CL1890Contig1;comp90693_c0_seq1;CL23639Contig1;comp99963_c0_seq3;CL56067Contig1;CL3908Contig1;CL2689Contig1;CL56572Contig1;CL92Contig1;CL…
GO:0001570	vasculogenesis	P	4	605	82	14674	0.249439	0.319098	1.18315	CL4969Contig1;CL55941Contig1;CL2517Contig1;CL44822Contig1
GO:0004715	non-membrane spanning protein tyrosine kinase activity	F	2	605	42	14674	0.249469	0.319098	1.15498	CL2033Contig1;comp66281_c0_seq1
GO:0030334	regulation of cell migration	P	2	605	42	14674	0.249469	0.319098	1.15498	CL53522Contig1;CL14671Contig1
GO:0003777	microtubule motor activity	F	5	605	103	14674	0.251369	0.321016	1.17741	CL57984Contig1;comp12586_c0_seq1;CL108Contig1;comp112602_c0_seq7;CL68159Contig1
GO:0007018	microtubule-based movement	P	5	605	103	14674	0.251369	0.321016	1.17741	CL57984Contig1;comp12586_c0_seq1;CL108Contig1;comp112602_c0_seq7;CL68159Contig1
GO:0042981	regulation of apoptotic process	P	3	605	62	14674	0.252204	0.321826	1.17361	CL75351Contig1;CL71697Contig1;CL1862Contig1
GO:0005578	proteinaceous extracellular matrix	C	6	605	125	14674	0.257302	0.327633	1.16422	CL53260Contig1;CL22723Contig1;CL52638Contig1;CL52970Contig1;CL57605Contig1;CL26915Contig1
GO:0001942	hair follicle development	P	1	605	24	14674	0.260227	0.327633	1.01061	CL54671Contig1
GO:0005158	insulin receptor binding	F	1	605	24	14674	0.260227	0.327633	1.01061	comp110565_c3_seq13
GO:0006914	autophagy	P	1	605	24	14674	0.260227	0.327633	1.01061	CL59013Contig1
GO:0007059	chromosome segregation	P	1	605	24	14674	0.260227	0.327633	1.01061	CL44822Contig1
GO:0008203	cholesterol metabolic process	P	1	605	24	14674	0.260227	0.327633	1.01061	CL54671Contig1
GO:0009749	response to glucose	P	1	605	24	14674	0.260227	0.327633	1.01061	CL16373Contig1
GO:0030141	secretory granule	C	1	605	24	14674	0.260227	0.327633	1.01061	CL20341Contig1
GO:0030553	cGMP binding	F	1	605	24	14674	0.260227	0.327633	1.01061	CL842Contig1
GO:0034707	chloride channel complex	C	1	605	24	14674	0.260227	0.327633	1.01061	CL37666Contig1
GO:0042813	Wnt-activated receptor activity	F	1	605	24	14674	0.260227	0.327633	1.01061	CL52970Contig1
GO:0045296	cadherin binding	F	1	605	24	14674	0.260227	0.327633	1.01061	CL1267Contig1
GO:0048589	developmental growth	P	1	605	24	14674	0.260227	0.327633	1.01061	CL53372Contig1
GO:0048752	semicircular canal morphogenesis	P	1	605	24	14674	0.260227	0.327633	1.01061	CL52638Contig1
GO:0050853	B cell receptor signaling pathway	P	1	605	24	14674	0.260227	0.327633	1.01061	CL2033Contig1
GO:0051225	spindle assembly	P	1	605	24	14674	0.260227	0.327633	1.01061	CL69045Contig1
GO:0055038	recycling endosome membrane	C	1	605	24	14674	0.260227	0.327633	1.01061	CL60568Contig1
GO:0005200	structural constituent of cytoskeleton	F	3	605	63	14674	0.261333	0.328509	1.15498	CL69045Contig1;CL1267Contig1;CL14086Contig1
GO:0005769	early endosome	C	3	605	63	14674	0.261333	0.328509	1.15498	CL14095Contig1;CL55248Contig1;CL26195Contig1
GO:0016787	hydrolase activity	F	8	605	169	14674	0.263025	0.330378	1.14814	CL45937Contig1;CL68808Contig1;CL54653Contig1;CL18361Contig1;CL2517Contig1;CL58595Contig1;comp191925_c0_seq1;CL54837Contig1
GO:0006281	DNA repair	P	5	605	105	14674	0.265338	0.333021	1.15498	CL59676Contig1;CL15875Contig1;CL64762Contig1;CL51600Contig1;comp112356_c0_seq15
GO:0003779	actin binding	F	13	605	280	14674	0.266788	0.33458	1.1261	CL50543Contig1;CL3289Contig1;CL38931Contig1;CL56592Contig1;CL17362Contig1;CL45317Contig1;CL54980Contig1;CL39382Contig1;CL74442Contig1;CL56610Contig1;CL14086Contig1;CL52395Contig1;CL52423Contig1
GO:0051056	regulation of small GTPase mediated signal transduction	P	3	605	64	14674	0.270523	0.339	1.13693	CL18593Contig1;CL327Contig1;CL1895Contig1
GO:0030514	negative regulation of BMP signaling pathway	P	2	605	44	14674	0.271958	0.340531	1.10248	CL75180Contig1;CL52970Contig1
GO:0005887	integral component of plasma membrane	C	14	605	304	14674	0.273624	0.340996	1.11699	CL22615Contig1;CL2963Contig1;CL2744Contig1;CL66710Contig1;CL44463Contig1;CL29147Contig1;CL17264Contig1;CL16855Contig1;CL75021Contig1;CL5006Contig1;CL54756Contig1;CL27176Contig1;CL5365Contig1;CL56191Contig1
GO:0000777	condensed chromosome kinetochore	C	1	605	25	14674	0.27573	0.340996	0.970182	CL44822Contig1
GO:0001944	vasculature development	P	1	605	25	14674	0.27573	0.340996	0.970182	CL52970Contig1
GO:0004843	ubiquitin-specific protease activity	F	1	605	25	14674	0.27573	0.340996	0.970182	CL14095Contig1
GO:0005876	spindle microtubule	C	1	605	25	14674	0.27573	0.340996	0.970182	CL44822Contig1
GO:0007269	neurotransmitter secretion	P	1	605	25	14674	0.27573	0.340996	0.970182	CL755Contig1
GO:0007286	spermatid development	P	1	605	25	14674	0.27573	0.340996	0.970182	CL58447Contig1
GO:0008584	male gonad development	P	1	605	25	14674	0.27573	0.340996	0.970182	CL52970Contig1
GO:0019838	growth factor binding	F	1	605	25	14674	0.27573	0.340996	0.970182	comp99963_c0_seq3
GO:0030902	hindbrain development	P	1	605	25	14674	0.27573	0.340996	0.970182	comp99963_c0_seq3
GO:0035050	embryonic heart tube development	P	1	605	25	14674	0.27573	0.340996	0.970182	CL53332Contig1
GO:0036342	post-anal tail morphogenesis	P	1	605	25	14674	0.27573	0.340996	0.970182	CL75180Contig1
GO:0040008	regulation of growth	P	1	605	25	14674	0.27573	0.340996	0.970182	CL13367Contig1
GO:0045860	positive regulation of protein kinase activity	P	1	605	25	14674	0.27573	0.340996	0.970182	CL55052Contig1
GO:0048169	regulation of long-term neuronal synaptic plasticity	P	1	605	25	14674	0.27573	0.340996	0.970182	CL43506Contig1
GO:0060059	embryonic retina morphogenesis in camera-type eye	P	1	605	25	14674	0.27573	0.340996	0.970182	CL7671Contig1
GO:0007160	cell-matrix adhesion	P	3	605	65	14674	0.279769	0.345724	1.11944	CL53574Contig1;CL52047Contig1;CL4780Contig1
GO:0042470	melanosome	C	2	605	45	14674	0.283284	0.349798	1.07798	comp70295_c0_seq1;comp70300_c0_seq1
GO:0000079	regulation of cyclin-dependent protein serine/threonine kinase activity	P	1	605	26	14674	0.291214	0.358212	0.932867	CL14322Contig1
GO:0001946	lymphangiogenesis	P	1	605	26	14674	0.291214	0.358212	0.932867	CL2033Contig1
GO:0004879	ligand-activated sequence-specific DNA binding RNA polymerase II transcription factor activity	F	1	605	26	14674	0.291214	0.358212	0.932867	CL51407Contig1
GO:0005080	protein kinase C binding	F	1	605	26	14674	0.291214	0.358212	0.932867	CL52423Contig1
GO:0005546	phosphatidylinositol-4,5-bisphosphate binding	F	1	605	26	14674	0.291214	0.358212	0.932867	CL3169Contig1
GO:0005178	integrin binding	F	2	605	46	14674	0.29465	0.361882	1.05455	CL2033Contig1;CL53332Contig1
GO:0005507	copper ion binding	F	2	605	46	14674	0.29465	0.361882	1.05455	CL55476Contig1;CL71697Contig1
GO:0051301	cell division	P	3	605	67	14674	0.2984	0.366208	1.08602	CL69045Contig1;CL14322Contig1;CL5466Contig1
GO:0006979	response to oxidative stress	P	2	605	47	14674	0.306043	0.373198	1.03211	CL57692Contig1;CL3624Contig1
GO:0003151	outflow tract morphogenesis	P	1	605	27	14674	0.306655	0.373198	0.898316	CL5783Contig1
GO:0005083	small GTPase regulator activity	F	1	605	27	14674	0.306655	0.373198	0.898316	CL17506Contig1
GO:0005643	nuclear pore	C	1	605	27	14674	0.306655	0.373198	0.898316	CL24273Contig1
GO:0007126	meiotic nuclear division	P	1	605	27	14674	0.306655	0.373198	0.898316	CL44267Contig1
GO:0017048	Rho GTPase binding	F	1	605	27	14674	0.306655	0.373198	0.898316	CL327Contig1
GO:0019829	cation-transporting ATPase activity	F	1	605	27	14674	0.306655	0.373198	0.898316	CL15982Contig1
GO:0030286	dynein complex	C	1	605	27	14674	0.306655	0.373198	0.898316	comp12586_c0_seq1
GO:0031902	late endosome membrane	C	1	605	27	14674	0.306655	0.373198	0.898316	CL45726Contig1
GO:0034446	substrate adhesion-dependent cell spreading	P	1	605	27	14674	0.306655	0.373198	0.898316	CL55089Contig1
GO:0045668	negative regulation of osteoblast differentiation	P	1	605	27	14674	0.306655	0.373198	0.898316	CL52970Contig1
GO:0008083	growth factor activity	F	4	605	90	14674	0.313415	0.381136	1.07798	CL57172Contig1;CL13429Contig1;CL51317Contig1;CL56191Contig1
GO:0003007	heart morphogenesis	P	2	605	48	14674	0.317453	0.384879	1.01061	CL53332Contig1;CL57294Contig1
GO:0005249	voltage-gated potassium channel activity	F	2	605	48	14674	0.317453	0.384879	1.01061	CL15142Contig1;CL5006Contig1
GO:0030182	neuron differentiation	P	2	605	48	14674	0.317453	0.384879	1.01061	CL57605Contig1;CL44822Contig1
GO:0045454	cell redox homeostasis	P	2	605	48	14674	0.317453	0.384879	1.01061	CL59308Contig1;comp86340_c1_seq1
GO:0001756	somitogenesis	P	4	605	91	14674	0.321583	0.387789	1.06613	CL5783Contig1;CL53372Contig1;CL75180Contig1;CL5006Contig1
GO:0001503	ossification	P	1	605	28	14674	0.322029	0.387789	0.866234	CL15376Contig1
GO:0004129	cytochrome-c oxidase activity	F	1	605	28	14674	0.322029	0.387789	0.866234	CL51660Contig1
GO:0004896	cytokine receptor activity	F	1	605	28	14674	0.322029	0.387789	0.866234	CL37449Contig1
GO:0005882	intermediate filament	C	1	605	28	14674	0.322029	0.387789	0.866234	CL58147Contig1
GO:0006919	activation of cysteine-type endopeptidase activity involved in apoptotic process	P	1	605	28	14674	0.322029	0.387789	0.866234	CL73602Contig1
GO:0030173	integral component of Golgi membrane	C	1	605	28	14674	0.322029	0.387789	0.866234	CL2400Contig1
GO:0035064	methylated histone binding	F	1	605	28	14674	0.322029	0.387789	0.866234	CL13634Contig1
GO:0060048	cardiac muscle contraction	P	1	605	28	14674	0.322029	0.387789	0.866234	CL15665Contig1
GO:0032403	protein complex binding	F	3	605	70	14674	0.326597	0.392995	1.03948	CL69045Contig1;comp70295_c0_seq1;comp70300_c0_seq1
GO:0000151	ubiquitin ligase complex	C	1	605	29	14674	0.337317	0.404679	0.836364	CL18595Contig1
GO:0006928	cellular component movement	P	1	605	29	14674	0.337317	0.404679	0.836364	CL69045Contig1
GO:0035019	somatic stem cell maintenance	P	1	605	29	14674	0.337317	0.404679	0.836364	CL52970Contig1
GO:0060271	cilium morphogenesis	P	1	605	29	14674	0.337317	0.404679	0.836364	CL54980Contig1
GO:0005057	receptor signaling protein activity	F	1	605	30	14674	0.352498	0.421317	0.808485	comp191925_c0_seq1
GO:0008144	drug binding	F	1	605	30	14674	0.352498	0.421317	0.808485	CL52970Contig1
GO:0022627	cytosolic small ribosomal subunit	C	1	605	30	14674	0.352498	0.421317	0.808485	CL2517Contig1
GO:0046847	filopodium assembly	P	1	605	30	14674	0.352498	0.421317	0.808485	CL53499Contig1
GO:0051287	NAD binding	F	1	605	30	14674	0.352498	0.421317	0.808485	CL67196Contig1
GO:0005516	calmodulin binding	F	4	605	95	14674	0.354455	0.423341	1.02124	CL13662Contig1;CL14560Contig1;CL56610Contig1;CL52423Contig1
GO:0006366	transcription from RNA polymerase II promoter	P	3	605	73	14674	0.354946	0.423612	0.996762	CL54999Contig1;comp94537_c0_seq6;CL51327Contig1
GO:0030336	negative regulation of cell migration	P	2	605	52	14674	0.363053	0.432643	0.932867	CL52970Contig1;CL26915Contig1
GO:0048793	pronephros development	P	2	605	52	14674	0.363053	0.432643	0.932867	CL75180Contig1;CL7671Contig1
GO:0007492	endoderm development	P	1	605	31	14674	0.367557	0.437035	0.782405	CL15376Contig1
GO:0042733	embryonic digit morphogenesis	P	1	605	31	14674	0.367557	0.437035	0.782405	CL53372Contig1
GO:0050679	positive regulation of epithelial cell proliferation	P	1	605	31	14674	0.367557	0.437035	0.782405	CL52970Contig1
GO:0004221	ubiquitin thiolesterase activity	F	2	605	53	14674	0.374396	0.444509	0.915266	CL14095Contig1;CL22148Contig1
GO:0042826	histone deacetylase binding	F	2	605	53	14674	0.374396	0.444509	0.915266	comp70295_c0_seq1;comp70300_c0_seq1
GO:0019904	protein domain specific binding	F	4	605	98	14674	0.379209	0.44989	0.989981	CL69045Contig1;comp70295_c0_seq1;comp70300_c0_seq1;CL9484Contig1
GO:0001843	neural tube closure	P	1	605	32	14674	0.382476	0.451097	0.757955	CL52970Contig1
GO:0007267	cell-cell signaling	P	1	605	32	14674	0.382476	0.451097	0.757955	CL51780Contig1
GO:0030318	melanocyte differentiation	P	1	605	32	14674	0.382476	0.451097	0.757955	CL43632Contig1
GO:0030501	positive regulation of bone mineralization	P	1	605	32	14674	0.382476	0.451097	0.757955	comp99963_c0_seq3
GO:0030903	notochord development	P	1	605	32	14674	0.382476	0.451097	0.757955	CL14671Contig1
GO:0032587	ruffle membrane	C	1	605	32	14674	0.382476	0.451097	0.757955	CL1895Contig1
GO:0042475	odontogenesis of dentin-containing tooth	P	1	605	32	14674	0.382476	0.451097	0.757955	CL53372Contig1
GO:0050852	T cell receptor signaling pathway	P	1	605	32	14674	0.382476	0.451097	0.757955	comp66281_c0_seq1
GO:0016323	basolateral plasma membrane	C	3	605	76	14674	0.383291	0.451725	0.957416	CL1267Contig1;CL16855Contig1;CL5365Contig1
GO:0035556	intracellular signal transduction	P	15	605	353	14674	0.384718	0.453075	1.03065	CL20341Contig1;CL47336Contig1;CL61982Contig1;CL13367Contig1;CL55688Contig1;CL15924Contig1;CL59115Contig1;comp66281_c0_seq1;CL5633Contig1;CL18691Contig1;CL47996Contig1;CL3483Contig1;CL973Contig1;CL66036Contig1;CL12619Contig1
GO:0016310	phosphorylation	P	6	605	146	14674	0.396852	0.465772	0.996762	CL67300Contig1;CL38354Contig1;CL2400Contig1;CL73602Contig1;CL5971Contig1;CL52423Contig1
GO:0004867	serine-type endopeptidase inhibitor activity	F	2	605	55	14674	0.396952	0.465772	0.881983	CL55064Contig1;CL9871Contig1
GO:0007517	muscle organ development	P	2	605	55	14674	0.396952	0.465772	0.881983	CL53372Contig1;CL54823Contig1
GO:0051726	regulation of cell cycle	P	2	605	55	14674	0.396952	0.465772	0.881983	CL24273Contig1;CL2517Contig1
GO:0007369	gastrulation	P	1	605	33	14674	0.397242	0.465772	0.734986	CL15376Contig1
GO:0017147	Wnt-protein binding	F	1	605	33	14674	0.397242	0.465772	0.734986	CL52970Contig1
GO:0016324	apical plasma membrane	C	5	605	124	14674	0.404208	0.473594	0.978006	CL55371Contig1;CL37903Contig1;CL5466Contig1;CL45141Contig1;CL3125Contig1
GO:0031290	retinal ganglion cell axon guidance	P	2	605	56	14674	0.408149	0.477862	0.866234	CL53372Contig1;CL55941Contig1
GO:0007155	cell adhesion	P	11	605	265	14674	0.411537	0.480084	1.00679	CL52238Contig1;CL53522Contig1;CL14542Contig1;CL55248Contig1;CL53825Contig1;CL9169Contig1;CL75021Contig1;CL13429Contig1;CL65018Contig1;CL14671Contig1;CL43632Contig1
GO:0005518	collagen binding	F	1	605	34	14674	0.411843	0.480084	0.713369	CL13429Contig1
GO:0005777	peroxisome	C	1	605	34	14674	0.411843	0.480084	0.713369	CL14199Contig1
GO:0007265	Ras protein signal transduction	P	1	605	34	14674	0.411843	0.480084	0.713369	CL14095Contig1
GO:0019083	viral transcription	P	1	605	34	14674	0.411843	0.480084	0.713369	CL2517Contig1
GO:0048015	phosphatidylinositol-mediated signaling	P	1	605	34	14674	0.411843	0.480084	0.713369	CL55052Contig1
GO:0001725	stress fiber	C	1	605	35	14674	0.426267	0.496177	0.692987	CL45317Contig1
GO:0031175	neuron projection development	P	1	605	35	14674	0.426267	0.496177	0.692987	CL55248Contig1
GO:0003824	catalytic activity	F	3	605	81	14674	0.430134	0.500316	0.898316	CL755Contig1;CL16711Contig1;CL53829Contig1
GO:0008233	peptidase activity	F	1	605	36	14674	0.440503	0.511634	0.673737	CL2689Contig1
GO:0048675	axon extension	P	1	605	36	14674	0.440503	0.511634	0.673737	CL15924Contig1
GO:0005085	guanyl-nucleotide exchange factor activity	F	2	605	59	14674	0.441333	0.512227	0.822188	CL18593Contig1;CL1895Contig1
GO:0050790	regulation of catalytic activity	P	6	605	153	14674	0.444307	0.515306	0.951159	CL54720Contig1;CL67774Contig1;CL67747Contig1;CL13997Contig1;CL39499Contig1;CL1895Contig1
GO:0004713	protein tyrosine kinase activity	F	2	605	60	14674	0.452237	0.523368	0.808485	CL55089Contig1;CL47996Contig1
GO:0006950	response to stress	P	2	605	60	14674	0.452237	0.523368	0.808485	CL53280Contig1;CL44770Contig1
GO:0045202	synapse	C	2	605	60	14674	0.452237	0.523368	0.808485	CL3169Contig1;CL1895Contig1
GO:0000785	chromatin	C	1	605	37	14674	0.454542	0.523393	0.655528	CL57901Contig1
GO:0008301	DNA binding, bending	F	1	605	37	14674	0.454542	0.523393	0.655528	comp97737_c0_seq1
GO:0010923	negative regulation of phosphatase activity	P	1	605	37	14674	0.454542	0.523393	0.655528	CL51567Contig1
GO:0030522	intracellular receptor signaling pathway	P	1	605	37	14674	0.454542	0.523393	0.655528	CL51407Contig1
GO:0030901	midbrain development	P	1	605	37	14674	0.454542	0.523393	0.655528	CL51349Contig1
GO:0050885	neuromuscular process controlling balance	P	1	605	37	14674	0.454542	0.523393	0.655528	CL13523Contig1
GO:0090263	positive regulation of canonical Wnt signaling pathway	P	1	605	37	14674	0.454542	0.523393	0.655528	CL52970Contig1
GO:0001666	response to hypoxia	P	3	605	84	14674	0.457797	0.526762	0.866234	CL4969Contig1;CL52253Contig1;CL58979Contig1
GO:0006897	endocytosis	P	2	605	61	14674	0.463052	0.532427	0.795231	CL53944Contig1;CL10260Contig1
GO:0001501	skeletal system development	P	1	605	38	14674	0.468378	0.536244	0.638278	CL53372Contig1
GO:0003333	amino acid transmembrane transport	P	1	605	38	14674	0.468378	0.536244	0.638278	CL17264Contig1
GO:0006415	translational termination	P	1	605	38	14674	0.468378	0.536244	0.638278	CL2517Contig1
GO:0035264	multicellular organism growth	P	1	605	38	14674	0.468378	0.536244	0.638278	CL49087Contig1
GO:0044281	small molecule metabolic process	P	1	605	38	14674	0.468378	0.536244	0.638278	CL53724Contig1
GO:0045494	photoreceptor cell maintenance	P	1	605	38	14674	0.468378	0.536244	0.638278	CL3169Contig1
GO:0001755	neural crest cell migration	P	2	605	62	14674	0.473773	0.541262	0.782405	CL5783Contig1;comp99963_c0_seq3
GO:0030324	lung development	P	2	605	62	14674	0.473773	0.541262	0.782405	CL53372Contig1;CL22723Contig1
GO:0032851	positive regulation of Rab GTPase activity	P	2	605	62	14674	0.473773	0.541262	0.782405	CL292Contig2;CL47996Contig1
GO:0006915	apoptotic process	P	7	605	182	14674	0.47789	0.545577	0.932867	CL53372Contig1;CL58386Contig1;CL51332Contig1;CL2400Contig1;CL54204Contig1;CL45141Contig1;CL26915Contig1
GO:0005543	phospholipid binding	F	16	605	399	14674	0.480142	0.547543	0.972613	CL61982Contig1;CL10939Contig1;CL57984Contig1;CL73978Contig1;comp110565_c3_seq13;CL67747Contig1;CL53704Contig1;CL18691Contig1;CL39499Contig1;CL53499Contig1;CL51361Contig1;CL14086Contig1;CL53944Contig1;comp191925_c0_seq1;CL10260Contig1;CL12619Contig1
GO:0005881	cytoplasmic microtubule	C	1	605	39	14674	0.482001	0.547543	0.621911	CL44822Contig1
GO:0030199	collagen fibril organization	P	1	605	39	14674	0.482001	0.547543	0.621911	CL22723Contig1
GO:0030307	positive regulation of cell growth	P	1	605	39	14674	0.482001	0.547543	0.621911	CL52970Contig1
GO:0038032	termination of G-protein coupled receptor signaling pathway	P	1	605	39	14674	0.482001	0.547543	0.621911	CL26195Contig1
GO:0042127	regulation of cell proliferation	P	1	605	39	14674	0.482001	0.547543	0.621911	CL71697Contig1
GO:0043197	dendritic spine	C	1	605	39	14674	0.482001	0.547543	0.621911	CL55688Contig1
GO:0008017	microtubule binding	F	5	605	135	14674	0.484801	0.550333	0.898316	CL57984Contig1;CL108Contig1;comp112602_c0_seq7;CL68159Contig1;CL44822Contig1
GO:0005097	Rab GTPase activator activity	F	2	605	64	14674	0.494913	0.559207	0.757955	CL292Contig2;CL47996Contig1
GO:0030165	PDZ domain binding	F	2	605	64	14674	0.494913	0.559207	0.757955	comp99963_c0_seq3;CL52970Contig1
GO:0008045	motor neuron axon guidance	P	1	605	40	14674	0.495408	0.559207	0.606364	CL53372Contig1
GO:0010008	endosome membrane	C	1	605	40	14674	0.495408	0.559207	0.606364	CL14095Contig1
GO:0016023	cytoplasmic membrane-bounded vesicle	C	1	605	40	14674	0.495408	0.559207	0.606364	CL74442Contig1
GO:0017137	Rab GTPase binding	F	1	605	40	14674	0.495408	0.559207	0.606364	CL5088Contig1
GO:0043154	negative regulation of cysteine-type endopeptidase activity involved in apoptotic process	P	1	605	40	14674	0.495408	0.559207	0.606364	CL44822Contig1
GO:0051258	protein polymerization	P	1	605	40	14674	0.495408	0.559207	0.606364	CL69045Contig1
GO:0008152	metabolic process	P	7	605	186	14674	0.502543	0.566862	0.912805	CL619Contig1;CL37903Contig1;CL8849Contig1;CL1809Contig1;CL13727Contig1;CL755Contig1;CL53829Contig1
GO:0003705	RNA polymerase II distal enhancer sequence-specific DNA binding transcription factor activity	F	1	605	41	14674	0.508591	0.571973	0.591574	comp97737_c0_seq1
GO:0005815	microtubule organizing center	C	1	605	41	14674	0.508591	0.571973	0.591574	CL52723Contig1
GO:0019902	phosphatase binding	F	1	605	41	14674	0.508591	0.571973	0.591574	CL14086Contig1
GO:0007507	heart development	P	4	605	114	14674	0.508632	0.571973	0.851037	CL53372Contig1;CL68962Contig1;CL56933Contig1;CL44822Contig1
GO:0006184	GTP catabolic process	P	10	605	260	14674	0.508857	0.571973	0.932867	CL69045Contig1;CL51818Contig1;CL56196Contig1;CL14542Contig1;CL22031Contig1;CL24273Contig1;CL59976Contig1;CL1862Contig1;CL10260Contig1;CL72452Contig1
GO:0005856	cytoskeleton	C	8	605	212	14674	0.512528	0.575697	0.915266	CL1420Contig1;CL50543Contig1;CL3289Contig1;CL39382Contig1;CL53704Contig1;CL32035Contig1;CL56610Contig1;CL4198Contig1
GO:0005622	intracellular	C	22	605	553	14674	0.513732	0.576645	0.964919	CL57763Contig1;comp99216_c0_seq1;CL13494Contig1;CL58021Contig1;CL18593Contig1;CL13367Contig1;CL50774Contig1;CL59115Contig1;CL5633Contig1;CL16017Contig1;CL57605Contig1;CL74680Contig1;CL55591Contig1;CL51217Contig1;CL9484Contig1;CL53499Contig1;CL15028Contig1;CL1862Contig1;CL5088Contig1;CL973Contig1;CL72452Contig1;CL66036Contig1
GO:0005923	tight junction	C	2	605	66	14674	0.515622	0.576748	0.734986	CL51686Contig1;CL5466Contig1
GO:0008289	lipid binding	F	2	605	66	14674	0.515622	0.576748	0.734986	CL15735Contig1;CL4157Contig1
GO:0016337	single organismal cell-cell adhesion	P	2	605	66	14674	0.515622	0.576748	0.734986	CL1267Contig1;CL53332Contig1
GO:0019048	modulation by virus of host morphology or physiology	P	2	605	66	14674	0.515622	0.576748	0.734986	comp70295_c0_seq1;comp70300_c0_seq1
GO:0070098	chemokine-mediated signaling pathway	P	2	605	66	14674	0.515622	0.576748	0.734986	CL55941Contig1;CL58279Contig1
GO:0007275	multicellular organismal development	P	6	605	164	14674	0.517302	0.578225	0.887361	CL53574Contig1;CL58447Contig1;CL15702Contig1;CL48013Contig1;CL51891Contig1;CL3295Contig1
GO:0009791	post-embryonic development	P	1	605	42	14674	0.521547	0.581349	0.577489	CL5783Contig1
GO:0035162	embryonic hemopoiesis	P	1	605	42	14674	0.521547	0.581349	0.577489	CL75180Contig1
GO:0042742	defense response to bacterium	P	1	605	42	14674	0.521547	0.581349	0.577489	CL2033Contig1
GO:0050660	flavin adenine dinucleotide binding	F	1	605	42	14674	0.521547	0.581349	0.577489	CL67196Contig1
GO:0000790	nuclear chromatin	C	1	605	43	14674	0.534272	0.592696	0.564059	CL13634Contig1
GO:0000902	cell morphogenesis	P	1	605	43	14674	0.534272	0.592696	0.564059	CL47996Contig1
GO:0001649	osteoblast differentiation	P	1	605	43	14674	0.534272	0.592696	0.564059	CL52970Contig1
GO:0033138	positive regulation of peptidyl-serine phosphorylation	P	1	605	43	14674	0.534272	0.592696	0.564059	CL55052Contig1
GO:0045666	positive regulation of neuron differentiation	P	1	605	43	14674	0.534272	0.592696	0.564059	CL53372Contig1
GO:0000287	magnesium ion binding	F	5	605	142	14674	0.534313	0.592696	0.854033	CL51818Contig1;CL53724Contig1;CL58447Contig1;CL15982Contig1;CL54204Contig1
GO:0034765	regulation of ion transmembrane transport	P	5	605	142	14674	0.534313	0.592696	0.854033	CL18996Contig1;CL15142Contig1;CL49004Contig1;CL33624Contig1;CL5006Contig1
GO:0007154	cell communication	P	2	605	68	14674	0.535867	0.594009	0.713369	CL14002Contig1;CL26195Contig1
GO:0042493	response to drug	P	3	605	93	14674	0.537609	0.595528	0.782405	CL16855Contig1;CL52970Contig1;CL5365Contig1
GO:0009897	external side of plasma membrane	C	2	605	69	14674	0.545808	0.603169	0.70303	CL13993Contig1;CL75021Contig1
GO:0000209	protein polyubiquitination	P	1	605	44	14674	0.546763	0.603169	0.55124	CL3483Contig1
GO:0005694	chromosome	C	1	605	44	14674	0.546763	0.603169	0.55124	CL44267Contig1
GO:0005741	mitochondrial outer membrane	C	1	605	44	14674	0.546763	0.603169	0.55124	CL59013Contig1
GO:0006614	SRP-dependent cotranslational protein targeting to membrane	P	1	605	44	14674	0.546763	0.603169	0.55124	CL2517Contig1
GO:0035091	phosphatidylinositol binding	F	1	605	44	14674	0.546763	0.603169	0.55124	CL26195Contig1
GO:0030496	midbody	C	2	605	70	14674	0.555623	0.611681	0.692987	CL14095Contig1;CL44822Contig1
GO:0042074	cell migration involved in gastrulation	P	2	605	70	14674	0.555623	0.611681	0.692987	CL52047Contig1;CL55941Contig1
GO:0043401	steroid hormone mediated signaling pathway	P	2	605	70	14674	0.555623	0.611681	0.692987	CL51548Contig1;CL51407Contig1
GO:0000910	cytokinesis	P	1	605	45	14674	0.559018	0.614575	0.53899	CL44822Contig1
GO:0045669	positive regulation of osteoblast differentiation	P	1	605	45	14674	0.559018	0.614575	0.53899	comp99963_c0_seq3
GO:0008565	protein transporter activity	F	1	605	46	14674	0.571035	0.627356	0.527273	CL53512Contig1
GO:0043005	neuron projection	C	2	605	72	14674	0.574868	0.631135	0.673737	CL43506Contig1;CL1895Contig1
GO:0051260	protein homooligomerization	P	3	605	98	14674	0.579302	0.635569	0.742486	CL15142Contig1;comp280541_c0_seq1;CL16373Contig1
GO:0008286	insulin receptor signaling pathway	P	1	605	47	14674	0.582812	0.638546	0.516054	CL34434Contig1
GO:0016605	PML body	C	1	605	47	14674	0.582812	0.638546	0.516054	CL92Contig1
GO:0016477	cell migration	P	2	605	73	14674	0.584293	0.639731	0.664508	CL44875Contig1;CL9299Contig1
GO:0042802	identical protein binding	F	8	605	225	14674	0.584869	0.639924	0.862384	CL29432Contig1;CL58386Contig1;CL68962Contig1;CL13523Contig1;CL56933Contig1;CL54204Contig1;CL52970Contig1;CL17768Contig1
GO:0006511	ubiquitin-dependent protein catabolic process	P	3	605	99	14674	0.58738	0.641797	0.734986	CL14095Contig1;CL22148Contig1;CL18595Contig1
GO:0007218	neuropeptide signaling pathway	P	3	605	99	14674	0.58738	0.641797	0.734986	CL16165Contig1;CL42148Contig1;CL184Contig1
GO:0006364	rRNA processing	P	1	605	48	14674	0.59435	0.647647	0.505303	CL69861Contig1
GO:0006874	cellular calcium ion homeostasis	P	1	605	48	14674	0.59435	0.647647	0.505303	CL18310Contig1
GO:0017111	nucleoside-triphosphatase activity	F	1	605	48	14674	0.59435	0.647647	0.505303	CL73740Contig1
GO:0048701	embryonic cranial skeleton morphogenesis	P	1	605	48	14674	0.59435	0.647647	0.505303	CL3407Contig1
GO:0007411	axon guidance	P	4	605	126	14674	0.598112	0.651304	0.769986	CL5783Contig1;CL15376Contig1;CL9484Contig1;CL51682Contig1
GO:0007268	synaptic transmission	P	3	605	101	14674	0.603261	0.65602	0.720432	CL56296Contig1;CL49087Contig1;CL184Contig1
GO:0043234	protein complex	C	3	605	101	14674	0.603261	0.65602	0.720432	CL67774Contig1;CL5466Contig1;CL7671Contig1
GO:0005509	calcium ion binding	F	32	605	828	14674	0.607246	0.659907	0.937374	CL10814Contig1;CL20341Contig1;CL1618Contig1;CL18996Contig1;CL4246Contig1;CL47336Contig1;CL4602Contig1;CL68720Contig1;CL13776Contig1;CL56592Contig1;CL13846Contig1;CL68962Contig1;CL54447Contig1;CL53437Contig1;CL50774Contig1;CL365Contig1;CL67774Contig1;CL19349Contig1;CL32123Contig1;CL56933Contig1;CL51036Contig1;CL4780Contig1;CL52638Contig1;CL7671Contig1;CL13429Contig1;CL53365Contig1;CL64242Contig1;C…
GO:0045892	negative regulation of transcription, DNA-templated	P	6	605	179	14674	0.610504	0.662999	0.813002	CL67774Contig1;comp280541_c0_seq1;CL52600Contig1;CL52970Contig1;CL16373Contig1;CL44822Contig1
GO:0030509	BMP signaling pathway	P	1	605	50	14674	0.616704	0.668825	0.485091	comp99963_c0_seq3
GO:0047485	protein N-terminus binding	F	1	605	50	14674	0.616704	0.668825	0.485091	CL34434Contig1
GO:0005938	cell cortex	C	2	605	77	14674	0.620638	0.672638	0.629988	CL5466Contig1;CL52423Contig1
GO:0000165	MAPK cascade	P	1	605	51	14674	0.627521	0.679179	0.475579	CL13523Contig1
GO:0003690	double-stranded DNA binding	F	1	605	51	14674	0.627521	0.679179	0.475579	comp97737_c0_seq1
GO:0048011	neurotrophin TRK receptor signaling pathway	P	2	605	78	14674	0.629379	0.680731	0.621911	comp70295_c0_seq1;comp70300_c0_seq1
GO:0044212	transcription regulatory region DNA binding	F	2	605	79	14674	0.637981	0.688307	0.614039	CL53372Contig1;CL51327Contig1
GO:0016311	dephosphorylation	P	1	605	52	14674	0.6381	0.688307	0.466434	CL49811Contig1
GO:0019221	cytokine-mediated signaling pathway	P	1	605	52	14674	0.6381	0.688307	0.466434	CL37449Contig1
GO:0030097	hemopoiesis	P	1	605	52	14674	0.6381	0.688307	0.466434	CL53437Contig1
GO:0006357	regulation of transcription from RNA polymerase II promoter	P	3	605	106	14674	0.6413	0.691294	0.686449	CL54999Contig1;CL51407Contig1;comp94537_c0_seq6
GO:0007420	brain development	P	4	605	133	14674	0.645851	0.695434	0.72946	CL15504Contig1;CL51332Contig1;CL7671Contig1;CL52970Contig1
GO:0030027	lamellipodium	C	2	605	80	14674	0.646441	0.695434	0.606364	CL1267Contig1;CL38931Contig1
GO:0030154	cell differentiation	P	2	605	80	14674	0.646441	0.695434	0.606364	CL48013Contig1;CL51891Contig1
GO:0016363	nuclear matrix	C	1	605	53	14674	0.648441	0.696651	0.457633	CL53930Contig1
GO:0030168	platelet activation	P	1	605	53	14674	0.648441	0.696651	0.457633	CL55089Contig1
GO:0009790	embryo development	P	4	605	134	14674	0.652373	0.700406	0.724016	CL54823Contig1;CL2517Contig1;comp97737_c0_seq1;CL44822Contig1
GO:0003924	GTPase activity	F	9	605	264	14674	0.65313	0.700749	0.82686	CL69045Contig1;CL56196Contig1;CL14542Contig1;CL22031Contig1;CL24273Contig1;CL59976Contig1;CL1862Contig1;CL10260Contig1;CL72452Contig1
GO:0005765	lysosomal membrane	C	1	605	54	14674	0.658547	0.704027	0.449158	CL45726Contig1
GO:0006812	cation transport	P	1	605	54	14674	0.658547	0.704027	0.449158	CL15982Contig1
GO:0007409	axonogenesis	P	1	605	54	14674	0.658547	0.704027	0.449158	CL1267Contig1
GO:0008380	RNA splicing	P	1	605	54	14674	0.658547	0.704027	0.449158	comp62502_c0_seq1
GO:0010976	positive regulation of neuron projection development	P	1	605	54	14674	0.658547	0.704027	0.449158	CL54980Contig1
GO:0006886	intracellular protein transport	P	4	605	135	14674	0.658818	0.704027	0.718653	CL4879Contig1;CL26195Contig1;comp112602_c0_seq7;CL5088Contig1
GO:0045893	positive regulation of transcription, DNA-templated	P	6	605	189	14674	0.666951	0.712244	0.769986	CL44781Contig1;CL67774Contig1;CL51349Contig1;CL59332Contig1;CL52970Contig1;comp97737_c0_seq1
GO:0042384	cilium assembly	P	1	605	55	14674	0.668418	0.713335	0.440992	CL7671Contig1
GO:0005198	structural molecule activity	F	3	605	110	14674	0.66996	0.714031	0.661488	CL15204Contig1;CL51686Contig1;CL58147Contig1
GO:0030425	dendrite	C	3	605	110	14674	0.66996	0.714031	0.661488	CL72487Contig1;CL55248Contig1;CL67747Contig1
GO:0006200	ATP catabolic process	P	9	605	268	14674	0.671516	0.715213	0.814518	CL66710Contig1;CL3988Contig1;CL46776Contig1;CL16855Contig1;CL15982Contig1;comp12586_c0_seq1;CL40433Contig1;CL5365Contig1;CL47996Contig1
GO:0030308	negative regulation of cell growth	P	1	605	56	14674	0.678058	0.721702	0.433117	CL52970Contig1
GO:0051216	cartilage development	P	2	605	84	14674	0.678871	0.722088	0.577489	comp99963_c0_seq3;CL52638Contig1
GO:0005891	voltage-gated calcium channel complex	C	1	605	57	14674	0.687468	0.730264	0.425518	CL18996Contig1
GO:0090090	negative regulation of canonical Wnt signaling pathway	P	1	605	57	14674	0.687468	0.730264	0.425518	CL51682Contig1
GO:0001947	heart looping	P	3	605	113	14674	0.690398	0.732891	0.643926	CL14002Contig1;CL75180Contig1;CL49004Contig1
GO:0032259	methylation	P	1	605	58	14674	0.696651	0.739039	0.418182	CL17Contig1
GO:0015031	protein transport	P	7	605	222	14674	0.700691	0.742834	0.764783	CL60568Contig1;CL51873Contig1;CL1618Contig1;CL57763Contig1;CL16242Contig1;CL50754Contig1;CL49087Contig1
GO:0070588	calcium ion transmembrane transport	P	4	605	143	14674	0.707561	0.749622	0.678449	CL52094Contig1;CL18996Contig1;CL68808Contig1;CL14002Contig1
GO:0005925	focal adhesion	C	2	605	88	14674	0.709045	0.750204	0.55124	CL68962Contig1;CL56933Contig1
GO:0016459	myosin complex	C	2	605	88	14674	0.709045	0.750204	0.55124	CL7053Contig1;CL52395Contig1
GO:0002040	sprouting angiogenesis	P	1	605	60	14674	0.714346	0.754319	0.404242	CL53896Contig1
GO:0004672	protein kinase activity	F	1	605	60	14674	0.714346	0.754319	0.404242	CL15168Contig1
GO:0007173	epidermal growth factor receptor signaling pathway	P	1	605	60	14674	0.714346	0.754319	0.404242	CL56191Contig1
GO:0006397	mRNA processing	P	2	605	89	14674	0.71624	0.75529	0.545046	comp62502_c0_seq1;CL54204Contig1
GO:0030424	axon	C	2	605	89	14674	0.71624	0.75529	0.545046	CL1267Contig1;CL56296Contig1
GO:0055085	transmembrane transport	P	8	605	252	14674	0.716678	0.75529	0.769986	CL3988Contig1;CL15990Contig1;CL2224Contig1;CL7702Contig1;CL47996Contig1;CL45141Contig1;CL40036Contig1;CL50111Contig1
GO:0005886	plasma membrane	C	40	605	1073	14674	0.719972	0.758264	0.904177	CL69045Contig1;CL60568Contig1;CL37666Contig1;CL51818Contig1;comp42969_c0_seq1;CL56578Contig1;CL842Contig1;CL1890Contig1;CL3169Contig1;CL56067Contig1;CL3908Contig1;CL14542Contig1;CL3988Contig1;CL55052Contig1;CL16165Contig1;CL2400Contig1;CL54447Contig1;CL41294Contig1;CL53494Contig1;CL51686Contig1;CL16242Contig1;CL4157Contig1;CL365Contig1;CL46776Contig1;CL33750Contig1;CL55941Contig1;CL42148Contig1;C…
GO:0000184	nuclear-transcribed mRNA catabolic process, nonsense-mediated decay	P	1	605	61	14674	0.722865	0.760764	0.397615	CL2517Contig1
GO:0019899	enzyme binding	F	2	605	90	14674	0.723295	0.760764	0.53899	CL55248Contig1;CL14489Contig1
GO:0004842	ubiquitin-protein transferase activity	F	6	605	201	14674	0.727656	0.764849	0.724016	CL68407Contig1;CL18595Contig1;CL47089Contig1;CL68929Contig1;CL32272Contig1;CL3483Contig1
GO:0005581	collagen trimer	C	2	605	91	14674	0.730214	0.767035	0.533067	CL56004Contig1;CL16373Contig1
GO:0014069	postsynaptic density	C	1	605	62	14674	0.731168	0.767535	0.391202	CL55688Contig1
GO:0046777	protein autophosphorylation	P	3	605	122	14674	0.74624	0.782765	0.596423	CL2033Contig1;comp66281_c0_seq1;CL54204Contig1
GO:0003743	translation initiation factor activity	F	1	605	64	14674	0.747141	0.782765	0.378977	CL58893Contig1
GO:0043524	negative regulation of neuron apoptotic process	P	1	605	64	14674	0.747141	0.782765	0.378977	CL44822Contig1
GO:0003774	motor activity	F	2	605	94	14674	0.750153	0.784896	0.516054	CL7053Contig1;CL52395Contig1
GO:0005215	transporter activity	F	2	605	94	14674	0.750153	0.784896	0.516054	CL2224Contig1;CL7702Contig1
GO:0016567	protein ubiquitination	P	5	605	179	14674	0.752529	0.786869	0.677501	CL59013Contig1;CL68407Contig1;CL13367Contig1;CL47089Contig1;CL68929Contig1
GO:0043066	negative regulation of apoptotic process	P	7	605	236	14674	0.762224	0.79604	0.719414	CL45005Contig1;CL58386Contig1;CL2400Contig1;CL29147Contig1;CL67774Contig1;CL13429Contig1;CL27176Contig1
GO:0003707	steroid hormone receptor activity	F	1	605	66	14674	0.762292	0.79604	0.367493	CL51407Contig1
GO:0008360	regulation of cell shape	P	1	605	67	14674	0.769569	0.803115	0.362008	CL74442Contig1
GO:0001525	angiogenesis	P	4	605	155	14674	0.771152	0.804245	0.625924	CL75206Contig1;CL2517Contig1;CL57605Contig1;CL44822Contig1
GO:0043547	positive regulation of GTPase activity	P	2	605	98	14674	0.774882	0.80761	0.494991	CL26195Contig1;CL53499Contig1
GO:0009952	anterior/posterior pattern specification	P	1	605	68	14674	0.776651	0.808402	0.356684	comp99963_c0_seq3
GO:0010628	positive regulation of gene expression	P	1	605	68	14674	0.776651	0.808402	0.356684	CL2400Contig1
GO:0005789	endoplasmic reticulum membrane	C	6	605	213	14674	0.780314	0.811688	0.683227	CL15504Contig1;CL22031Contig1;CL55688Contig1;CL2166Contig1;CL54823Contig1;CL42838Contig1
GO:0031965	nuclear membrane	C	1	605	70	14674	0.790245	0.821486	0.346494	CL51660Contig1
GO:0007050	cell cycle arrest	P	1	605	71	14674	0.796765	0.827191	0.341613	CL54204Contig1
GO:0071013	catalytic step 2 spliceosome	C	1	605	71	14674	0.796765	0.827191	0.341613	CL50686Contig1
GO:0008284	positive regulation of cell proliferation	P	4	605	161	14674	0.798735	0.828701	0.602597	CL54999Contig1;CL35022Contig1;CL54447Contig1;CL51095Contig1
GO:0046982	protein heterodimerization activity	F	6	605	219	14674	0.803642	0.833252	0.664508	CL15376Contig1;CL52047Contig1;comp70295_c0_seq1;comp70300_c0_seq1;CL59332Contig1;CL50754Contig1
GO:0007264	small GTPase mediated signal transduction	P	8	605	276	14674	0.808155	0.836922	0.70303	CL57763Contig1;CL14542Contig1;CL13494Contig1;CL18593Contig1;CL16242Contig1;CL327Contig1;CL15028Contig1;CL1895Contig1
GO:0005764	lysosome	C	1	605	73	14674	0.809268	0.836922	0.332254	CL20059Contig1
GO:0006260	DNA replication	P	1	605	73	14674	0.809268	0.836922	0.332254	comp8250_c0_seq1
GO:0060070	canonical Wnt signaling pathway	P	1	605	73	14674	0.809268	0.836922	0.332254	CL52970Contig1
GO:0003714	transcription corepressor activity	F	1	605	75	14674	0.821082	0.8475	0.323394	comp280541_c0_seq1
GO:0006414	translational elongation	P	1	605	75	14674	0.821082	0.8475	0.323394	CL2517Contig1
GO:0006935	chemotaxis	P	1	605	75	14674	0.821082	0.8475	0.323394	CL58279Contig1
GO:0007605	sensory perception of sound	P	1	605	76	14674	0.82674	0.852791	0.319139	CL2166Contig1
GO:0016607	nuclear speck	C	1	605	77	14674	0.832236	0.857358	0.314994	CL53372Contig1
GO:0043123	positive regulation of I-kappaB kinase/NF-kappaB signaling	P	1	605	77	14674	0.832236	0.857358	0.314994	CL16373Contig1
GO:0006413	translational initiation	P	1	605	82	14674	0.857422	0.882738	0.295787	CL2517Contig1
GO:0030335	positive regulation of cell migration	P	1	605	83	14674	0.862026	0.886908	0.292223	CL57605Contig1
GO:0000139	Golgi membrane	C	4	605	178	14674	0.862785	0.88712	0.545046	CL60568Contig1;CL52119Contig1;CL14542Contig1;CL15504Contig1
GO:0003682	chromatin binding	F	6	605	240	14674	0.870522	0.894243	0.606364	CL53372Contig1;CL18595Contig1;CL13634Contig1;CL34434Contig1;CL47116Contig1;CL31700Contig1
GO:0016887	ATPase activity	F	1	605	85	14674	0.870827	0.894243	0.285348	comp12586_c0_seq1
GO:0043025	neuronal cell body	C	3	605	151	14674	0.874474	0.897412	0.481878	CL72487Contig1;CL2166Contig1;CL56296Contig1
GO:0015629	actin cytoskeleton	C	1	605	87	14674	0.87911	0.901593	0.278788	CL1267Contig1
GO:0003700	sequence-specific DNA binding transcription factor activity	F	17	605	554	14674	0.880477	0.902419	0.744273	comp111663_c0_seq2;CL53372Contig1;CL51548Contig1;CL53437Contig1;CL44781Contig1;CL67791Contig1;CL75351Contig1;CL51349Contig1;CL59332Contig1;CL48123Contig1;CL3Contig4;comp112602_c0_seq7;comp103949_c0_seq2;comp113025_c0_seq13;CL19737Contig1;comp86340_c1_seq1;CL52865Contig1
GO:0000166	nucleotide binding	F	7	605	274	14674	0.882444	0.903857	0.619642	CL58218Contig1;CL8209Contig1;comp62502_c0_seq1;CL54389Contig1;comp8250_c0_seq1;CL53773Contig1;CL58893Contig1
GO:0001701	in utero embryonic development	P	2	605	122	14674	0.884089	0.904964	0.397615	CL53372Contig1;CL49087Contig1
GO:0008134	transcription factor binding	F	2	605	124	14674	0.890612	0.91106	0.391202	comp280541_c0_seq1;comp97737_c0_seq1
GO:0006810	transport	P	2	605	125	14674	0.893749	0.913494	0.388073	CL45726Contig1;CL42838Contig1
GO:0005829	cytosol	C	26	605	807	14674	0.894131	0.913494	0.781435	CL69045Contig1;CL51818Contig1;CL2033Contig1;CL1267Contig1;CL35022Contig1;CL53724Contig1;CL14095Contig1;CL890Contig1;CL56592Contig1;CL52176Contig1;CL22031Contig1;CL24273Contig1;CL67774Contig1;comp70295_c0_seq1;comp70300_c0_seq1;comp66281_c0_seq1;CL52510Contig1;CL52970Contig1;CL327Contig1;CL74442Contig1;CL66Contig1;CL44198Contig1;CL50686Contig1;CL44822Contig1;CL1895Contig1;CL51095Contig1
GO:0016192	vesicle-mediated transport	P	1	605	92	14674	0.897717	0.916574	0.263636	CL16242Contig1
GO:0006468	protein phosphorylation	P	18	605	601	14674	0.910112	0.928638	0.726426	CL842Contig1;CL44463Contig1;comp99963_c0_seq3;CL58447Contig1;CL51686Contig1;CL15168Contig1;CL29147Contig1;CL15924Contig1;CL17506Contig1;CL5006Contig1;CL55089Contig1;CL14945Contig1;CL27176Contig1;CL57294Contig1;CL47996Contig1;CL61104Contig1;CL44822Contig1;CL54857Contig1
GO:0007049	cell cycle	P	2	605	132	14674	0.913535	0.931538	0.367493	CL14322Contig1;CL5466Contig1
GO:0003677	DNA binding	F	26	605	826	14674	0.917053	0.934532	0.76346	CL53262Contig1;CL5261Contig1;CL52165Contig1;CL12583Contig1;CL51801Contig1;CL4383Contig1;CL44781Contig1;comp112590_c1_seq4;CL15708Contig1;CL14738Contig1;CL14035Contig1;CL25028Contig1;CL48106Contig1;comp8250_c0_seq1;CL44267Contig1;CL72691Contig1;CL17768Contig1;CL34434Contig1;CL57901Contig1;CL47996Contig1;comp103949_c0_seq2;CL66Contig1;CL31700Contig1;CL4517Contig1;CL55109Contig1;CL6160Contig1
GO:0005743	mitochondrial inner membrane	C	2	605	138	14674	0.927763	0.944845	0.351515	CL15830Contig1;comp106679_c0_seq15
GO:0008022	protein C-terminus binding	F	1	605	103	14674	0.929658	0.946174	0.235481	CL13523Contig1
GO:0008285	negative regulation of cell proliferation	P	3	605	174	14674	0.932067	0.948025	0.418182	CL52253Contig1;CL51327Contig1;CL26915Contig1
GO:0007067	mitotic nuclear division	P	1	605	105	14674	0.934345	0.94974	0.230996	CL44822Contig1
GO:0042803	protein homodimerization activity	F	7	605	303	14674	0.935882	0.950699	0.560336	comp96179_c1_seq3;CL13662Contig1;CL49837Contig1;CL15376Contig1;CL5149Contig1;CL16373Contig1;CL44822Contig1
GO:0006355	regulation of transcription, DNA-templated	P	22	605	738	14674	0.938855	0.953116	0.723035	comp111663_c0_seq2;CL57241Contig1;CL51548Contig1;CL3407Contig1;CL53437Contig1;CL4383Contig1;CL67791Contig1;CL75351Contig1;CL25028Contig1;CL54204Contig1;CL44267Contig1;CL48123Contig1;CL327Contig1;CL74680Contig1;CL3Contig4;comp112602_c0_seq7;comp103949_c0_seq2;comp113025_c0_seq13;CL19737Contig1;CL31700Contig1;comp86340_c1_seq1;CL52865Contig1
GO:0043565	sequence-specific DNA binding	F	11	605	426	14674	0.940082	0.953759	0.626291	CL53372Contig1;CL51548Contig1;CL51407Contig1;CL75351Contig1;CL51349Contig1;CL59332Contig1;comp97737_c0_seq1;CL48123Contig1;comp112602_c0_seq7;CL19737Contig1;CL52865Contig1
GO:0004871	signal transducer activity	F	3	605	180	14674	0.94251	0.955617	0.404242	CL53437Contig1;CL18691Contig1;comp112602_c0_seq7
GO:0019901	protein kinase binding	F	3	605	189	14674	0.955451	0.968126	0.384993	CL2033Contig1;CL14322Contig1;CL53574Contig1
GO:0005813	centrosome	C	2	605	157	14674	0.959814	0.971933	0.308975	CL13592Contig1;CL52423Contig1
GO:0005515	protein binding	F	17	605	624	14674	0.960628	0.972144	0.660781	CL51818Contig1;CL38354Contig1;CL92Contig1;CL54447Contig1;CL41294Contig1;CL58447Contig1;CL10939Contig1;CL55688Contig1;CL75021Contig1;CL5466Contig1;CL67747Contig1;CL58893Contig1;CL287Contig1;CL49087Contig1;CL51361Contig1;CL50686Contig1;CL31700Contig1
GO:0005667	transcription factor complex	C	2	605	160	14674	0.963447	0.974381	0.303182	CL59332Contig1;comp97737_c0_seq1
GO:0008283	cell proliferation	P	1	605	123	14674	0.965079	0.975417	0.197191	CL14095Contig1
GO:0003735	structural constituent of ribosome	F	2	605	165	14674	0.968824	0.978304	0.293994	CL2517Contig1;CL69861Contig1
GO:0007165	signal transduction	P	10	605	429	14674	0.969155	0.978304	0.565374	CL842Contig1;CL12997Contig1;CL68252Contig1;CL53437Contig1;CL51524Contig1;CL15227Contig1;CL52638Contig1;comp112602_c0_seq7;CL53499Contig1;comp191925_c0_seq1
GO:0004674	protein serine/threonine kinase activity	F	7	605	337	14674	0.970458	0.979003	0.503804	CL58447Contig1;CL51686Contig1;CL15924Contig1;CL17506Contig1;CL54204Contig1;CL61104Contig1;CL54857Contig1
GO:0006412	translation	P	1	605	136	14674	0.978092	0.985362	0.178342	CL69861Contig1
GO:0043065	positive regulation of apoptotic process	P	1	605	136	14674	0.978092	0.985362	0.178342	CL51327Contig1
GO:0000122	negative regulation of transcription from RNA polymerase II promoter	P	5	605	284	14674	0.978604	0.985362	0.427017	CL53372Contig1;CL13634Contig1;comp97737_c0_seq1;CL51327Contig1;CL4517Contig1
GO:0048471	perinuclear region of cytoplasm	C	5	605	287	14674	0.980255	0.986405	0.422553	CL22031Contig1;CL24273Contig1;CL58893Contig1;CL44198Contig1;CL51095Contig1
GO:0005524	ATP binding	F	51	605	1622	14674	0.981783	0.987323	0.762628	CL2033Contig1;CL53280Contig1;CL842Contig1;CL66710Contig1;CL44463Contig1;comp99963_c0_seq3;CL3988Contig1;CL55052Contig1;CL52176Contig1;CL73602Contig1;CL58447Contig1;CL51686Contig1;CL73519Contig1;CL15168Contig1;CL71471Contig1;CL29147Contig1;CL57984Contig1;CL15924Contig1;CL46776Contig1;CL13592Contig1;CL33624Contig1;CL16855Contig1;CL7053Contig1;CL17506Contig1;CL15982Contig1;comp66281_c0_seq1;CL55089C…
GO:0005654	nucleoplasm	C	2	605	197	14674	0.989084	0.99274	0.246239	CL57241Contig1;CL50686Contig1
GO:0007156	homophilic cell adhesion via plasma membrane adhesion molecules	P	2	605	197	14674	0.989084	0.99274	0.246239	CL365Contig1;CL5149Contig1
GO:0005794	Golgi apparatus	C	6	605	344	14674	0.989265	0.99274	0.423044	CL842Contig1;CL55248Contig1;CL15376Contig1;CL16242Contig1;CL60989Contig1;CL55827Contig1
GO:0005739	mitochondrion	C	11	605	510	14674	0.989645	0.99274	0.523137	comp12324_c0_seq1;comp70960_c0_seq1;CL52300Contig1;CL54788Contig1;CL14489Contig1;comp70295_c0_seq1;comp70831_c0_seq1;comp70300_c0_seq1;CL54204Contig1;CL327Contig1;CL14199Contig1
GO:0005737	cytoplasm	C	48	605	1610	14674	0.993058	0.99554	0.723117	comp96179_c1_seq3;CL37903Contig1;CL68407Contig1;CL52133Contig1;CL54907Contig1;comp99963_c0_seq3;CL53372Contig1;CL58918Contig1;CL3289Contig1;CL68252Contig1;CL58386Contig1;CL57904Contig1;CL13776Contig1;CL49837Contig1;CL54447Contig1;CL53930Contig1;CL44781Contig1;CL47089Contig1;CL48013Contig1;CL59252Contig1;CL17Contig1;CL25028Contig1;CL52253Contig1;CL13523Contig1;CL55089Contig1;CL56296Contig1;CL15227…
GO:0045944	positive regulation of transcription from RNA polymerase II promoter	P	5	605	365	14674	0.997877	0.999597	0.332254	CL20341Contig1;CL47336Contig1;CL53372Contig1;CL55298Contig1;CL34434Contig1
GO:0005634	nucleus	C	67	605	2234	14674	0.998381	0.999597	0.727419	CL54999Contig1;CL37666Contig1;CL15015Contig1;CL68407Contig1;comp111663_c0_seq2;comp110218_c0_seq22;CL14095Contig1;CL53262Contig1;CL54907Contig1;CL14322Contig1;CL51548Contig1;CL58918Contig1;CL52165Contig1;CL53834Contig1;CL2400Contig1;CL51801Contig1;CL45317Contig1;CL18595Contig1;CL54788Contig1;CL53437Contig1;CL4383Contig1;CL44781Contig1;CL51407Contig1;CL51600Contig1;CL67791Contig1;CL59252Contig1;CL…
GO:0005730	nucleolus	C	7	605	464	14674	0.998976	0.999597	0.365909	CL51873Contig1;CL51332Contig1;CL13592Contig1;CL45250Contig1;CL34434Contig1;CL57901Contig1;CL73740Contig1
GO:0006351	transcription, DNA-templated	P	15	605	777	14674	0.999597	0.999597	0.468234	CL57241Contig1;CL53372Contig1;CL51548Contig1;CL44781Contig1;CL51407Contig1;CL25028Contig1;CL51349Contig1;CL59332Contig1;CL54204Contig1;CL44267Contig1;CL55298Contig1;comp97737_c0_seq1;CL44822Contig1;CL31700Contig1;CL52865Contig1
